1 **The *in vivo* transcriptome of *Schistosoma mansoni* in two prominent vector species,**  
2 ***Biomphalaria pfeifferi* and *B. glabrata***

3 Sarah K. Buddenborg<sup>1</sup>, Bishoy Kamel<sup>1</sup>, Ben Hanelt<sup>1</sup>, Lijing Bu<sup>1</sup>, Si-Ming Zhang<sup>1</sup>, Gerald M.  
4 Mkoji<sup>2</sup>, Eric S. Loker<sup>1</sup>

5 <sup>1</sup> Department of Biology, Center for Evolutionary and Theoretical Immunology, University of New  
6 Mexico, Albuquerque NM USA

7 <sup>2</sup> Center for Biotechnology Research and Development, Kenya Medical Research Institute,  
8 Nairobi KEN

9

10 \*Corresponding author

11 Email: sbuddenb@unm.edu

12

13 **ABSTRACT**

14 **Background**

15 The full scope of the genes expressed by schistosomes during intramolluscan development  
16 has yet to be characterized. Understanding the gene products deployed by larval schistosomes  
17 in their snail hosts will provide insights into their establishment, maintenance, asexual  
18 reproduction, ability to castrate their hosts, and their prolific production of human-infective  
19 cercariae. Using the Illumina platform, the intramolluscan transcriptome of *Schistosoma*  
20 *mansoni* was investigated in field-derived specimens of the prominent vector species  
21 *Biomphalaria pfeifferi* at 1 and 3 days post infection (d) and from snails shedding cercariae.  
22 These *S. mansoni* samples were derived from the same snails used in our complementary *B.*  
23 *pfeifferi* transcriptomic study. We supplemented this view with microarray analyses of *S.*  
24 *mansoni* from *B. glabrata* at 2d, 4d, 8d, 16d, and 32d.

25 **Principal Findings**

26 Transcripts representing at least 7,740 (66%) of known *S. mansoni* genes were expressed  
27 during intramolluscan development, with the greatest number expressed in snails shedding  
28 cercariae. Many transcripts were constitutively expressed throughout development featuring  
29 membrane transporters, and metabolic enzymes involved in protein and nucleic acid synthesis  
30 and cell division. Several proteases and protease inhibitors were expressed at all stages,  
31 including some proteases usually associated with cercariae. Transcripts associated with G-  
32 protein coupled receptors, germ cell perpetuation, and stress responses and defense were well  
33 represented. We noted transcripts homologous to planarian anti-bacterial factors, several neural  
34 development or neuropeptide transcripts including neuropeptide Y, and receptors that may be

35 associated with schistosome germinal cell maintenance and that could also impact host  
36 reproduction. In at least one snail the presence of larvae of another digenean species (an  
37 amphistome) was associated with repressed *S. mansoni* transcriptional activity.

### 38 **Conclusions/Significance**

39 This *in vivo* study, particularly featuring field-derived snails and schistosomes, provides a  
40 distinct view from previous studies of development of cultured intramolluscan stages from lab-  
41 maintained organisms. We found many highly represented transcripts with suspected or  
42 unknown functions, with connection to intramolluscan development yet to be elucidated.

43

### 44 **AUTHOR SUMMARY**

45 *Schistosoma mansoni* is one of the most important schistosome species causing the  
46 neglected tropical disease human intestinal schistosomiasis. By focusing on *S. mansoni in vivo*  
47 with its broadly distributed sub-Saharan African snail intermediate host, *Biomphalaria pfeifferi*,  
48 we uncover new insights and basic knowledge of this host-parasite relationship that are critical  
49 for understanding schistosomiasis transmission. We show that *in vivo* studies, particularly using  
50 field-derived specimens, provides a distinct view from the uniformed transcriptional responses  
51 traditionally seen from *in vitro* studies on *S. mansoni* and *Biomphalaria* snails. With the growing  
52 consensus that we need to supplement chemotherapy with other control methods,  
53 understanding how *S. mansoni* interacts with its obligatory snail host becomes integral for future  
54 planning of control programs. The data provided within provides specific analysis on how the  
55 schistosomes successfully protect themselves from host defenses and the necessary  
56 transcriptional responses required for its amplifying asexual proliferation that result in human-  
57 infective cercariae.

58

### 59 **INTRODUCTION**

60 The vast majority of the estimated 18,000 species of digenetic trematodes depend on a  
61 molluscan host, usually a gastropod, in which to undertake the complex developmental program  
62 characterized by extensive asexual reproduction and production of numerous cercariae [1-3].  
63 The extent to which this large lineage of parasites has remained true to its dependence on  
64 molluscs, and the evident success achieved by digeneans - including by some species  
65 responsible for causing human disease - pose fundamental questions of interest for  
66 parasitologists, evolutionary biologists, ecologists, developmental biologists and comparative  
67 immunologists.

68 There is much about digenean-gastropod associations worthy of study: the host specificity  
69 often shown; the manner by which digeneans establish intimate infections without provoking  
70 destructive host responses; the ability of digeneans to affect and manipulate the energy and  
71 resource budgets of their hosts, including to achieve host castration; the intricate developmental  
72 program featuring multiple stages, asexual reproduction and the perpetuation of the germinal  
73 cell lineage; and finally the tendency for some infections to persist for long periods of time,  
74 implying protection of the snail-digenean unit that might involve contributions by the parasite to  
75 promote its perpetuation. These common and enduring relationships are also targeted and  
76 exploited by other organisms, including competing digenean species. One way forward to gain a  
77 deeper understanding of all these processes is to acquire a comprehensive overview of the  
78 genes expressed by host snails and larval digeneans during the course of infection. This in turn  
79 sets the stage for eventually learning more about these two sets of gene products interact (the  
80 interactome) to influence the outcome of this interaction.

81 Because *S. mansoni* causes intestinal schistosomiasis in an estimated 166 million people in  
82 the Neotropics, Africa and Southwest Asia, it has long been intensively studied, in part because  
83 it is relatively easily maintained in a laboratory setting [4,5]. Many molecular tools, including the  
84 current fifth version of an improving genome sequence and assembly are available for *S.*  
85 *mansoni* [6,7]. Additionally, *B. glabrata*, the most important host for *S. mansoni* in the  
86 Neotropics, has become a model gastropod host, including with a recently available genome  
87 sequence [8]. In Africa, several *Biomphalaria* species play an important role in transmission,  
88 with the most important being *B. pfeifferi*. The latter species occurs widely across sub-Saharan  
89 Africa, where >90% of the world's cases of schistosomiasis now occur. *B. pfeifferi* is probably  
90 responsible for transmitting more *S. mansoni* infections than any other snail species [9].

91 With respect to the intramolluscan development of *S. mansoni*, following penetration of  
92 miracidia usually into the tentacles or head-foot of the snail, there is a 24 hour period of  
93 transformation as miracidial ciliated epidermal plates, apical papilla, and sensory papillae are  
94 shed and a syncytial tegument is formed around the developing mother (or primary) sporocyst  
95 [10,11]. This early period can be thought of as one of parasite transition and establishment. The  
96 miracidium has carried into the snail a series of germinal cells that are destined to give rise to  
97 the daughter (or secondary) sporocysts [10]. Mitotic division of germinal cells begins as early as  
98 24 hours and germinal cells proliferate notably in an enlarging mother sporocyst [12]. By 6 days  
99 after infection, all mother sporocysts have germinal balls (daughter sporocyst embryos) which  
100 occupy nearly the entire body cavity [10,13,14]. The embryonic daughter sporocysts, of which  
101 there are an average of 23 produced per mother sporocyst [10], continue to grow and elongate.

102 Daughter sporocysts exit mother sporocysts at 12-14 days and start their migration to the  
103 digestive gland and ovotestis region of the snail [10,13,15]. Upon release of daughter  
104 sporocysts, mother sporocysts collapse and typically do not continue to produce daughter  
105 sporocysts, but they nonetheless persist in the head-foot of the snail. By 15-20 days, daughter  
106 sporocysts undergo a remarkable transformation, losing their definitive vermiform shape to  
107 become amorphous and are wedged between lobules of the digestive gland. Within them,  
108 cercarial embryos begin to develop, passing through 10 characteristic developmental stages  
109 culminating in the production of a muscular tail and a body dominated by gland cells that are  
110 filled with lytic enzymes [10,16]. Once again, a separate allotment of germinal cells is  
111 sequestered in the cercarial body and these are destined to become the gonads and  
112 reproductive cell lineages of adult worms. Around 32 days post-exposure, cercariae exit from  
113 daughter sporocysts, migrate through the snail's body and emerge into the water, usually  
114 through hemorrhages in the mantle. Daughter sporocysts occupy a significant proportion of the  
115 snail host's body; 65% of the snail's digestive gland can be occupied by daughter sporocysts in  
116 a patent, cercariae-producing infection [17].

117 The timing of these events is dependent on temperature but cercarial shedding can occur as  
118 early as 19 days post-miracidial penetration [18]. Also, in some situations, daughter sporocysts  
119 will produce granddaughter sporocysts in lieu of cercariae [19]. So, beginning with the  
120 penetration of a single miracidium and proceeding through at least two distinct phases of  
121 asexual reproduction, thousands of cercariae can ultimately be produced [20]. A typical  
122 consequence of infection is that snails are partially or totally castrated, the extent depending on  
123 whether they were infected before or after achieving maturity [15,21]. This interaction is  
124 remarkable in that some *Biomphalaria* snails can survive for over a year shedding cercariae  
125 daily [20], although there is considerable variability in the duration of survival of infected snails.  
126 The productivity of infections within snails has no doubt contributed greatly to the success of all  
127 digenetic trematodes, and in the case of human-infecting schistosomes, is a major factor  
128 complicating their control.

129 Despite the significant immunobiological, physiological, and reproductive changes inflicted  
130 upon infected *Biomphalaria* snails [22]. we still lack a comprehensive picture of what the  
131 parasite is producing to effect such changes. Verjovski-Almeida et al. [23] recovered 16,715  
132 ESTs from early-developing cercarial germ balls derived from snails with patent *S. mansoni*  
133 infections. These ESTs were distinctive from those noted for miracidia, cercariae,  
134 schistosomulae, eggs, and adults. A first-generation *S. mansoni* microarray containing 7,335  
135 features was used to monitor expression changes of miracidia and *in vitro*-cultured 4d mother

136 sporocysts [24]. Of the 7,335 features, 273 (6%) of these were expressed only in sporocysts.  
137 Gene products with antioxidant activity, oxidoreductases, and intermolecular binding activity  
138 were represented in mother sporocyst-specific genes. Proteomic analyses of products released  
139 *in vitro* by miracidia of *S. mansoni* transforming into mother sporocysts revealed 127 proteins  
140 produced, 99 of which could be identified [25]. Among these were proteases, protease  
141 inhibitors, heat shock proteins, redox/antioxidant enzymes, ion-binding proteins, and venom  
142 allergen-like (SmVAL) proteins. Wang et al. [26] also provided an analysis of proteins released  
143 by *S. mansoni* miracidia and noted several of the same features, and also provided a foundation  
144 for further study of neurohormones produced by *S. mansoni* larvae. Cultured mother sporocysts  
145 were a component of SAGE tag generation by Williams et al. [27]. Highlights of 6d and 20d  
146 cultured mother sporocysts transcript expression were an up-regulation of HSP 70, HSP 40, egg  
147 protein, and trypsinogen 1-like all exclusive to miracidia and sporocyst stages. LongSAGE was  
148 utilized by Taft et al. [29] to identify transcripts from miracidia, or 6d or 20d cultured mother  
149 sporocysts grown in medium conditioned by sporocysts or by products derived from the Bge (*B.*  
150 *glabrata* embryo) cell line. Amongst the groups studied, 432 transcripts were differentially  
151 expressed (DE), which was also dependent on whether or not the sporocysts had been  
152 conditioned in medium with Bge cell products. Wang et al. [12] in a functional study of germinal  
153 cells in intramolluscan stages of *S. mansoni*, noted similarities in molecular signatures with the  
154 neoblast stem cells produced by planarians.

155 Here, our primary focus is on presentation of RNA-Seq results for *S. mansoni* from the same  
156 field-derived Kenyan snails that comprised the *B. pfeifferi* transcriptomic study of Buddenberg et  
157 al. [22]. Briefly, field-derived snails found negative upon isolation and shedding were exposed  
158 experimentally to *S. mansoni* miracidia hatched from eggs from fecal samples from local  
159 schoolchildren. These exposed snails were harvested 1 or 3 days later. Additionally, field snails  
160 found to be naturally shedding *S. mansoni* cercariae were chosen for study. Our goal was to  
161 provide *in vivo* views of establishment of early mother sporocyst development and shedding  
162 stages for snails and parasites taken directly from natural transmission sites. We did not  
163 investigate longer exposure intervals following experimental exposures because we did not  
164 want these snails to lose their field characteristics. Additionally, we supplemented these  
165 observations with results from a set of independent microarray experiments of *S. mansoni* in *B.*  
166 *glabrata* acquired at 2, 4, 8, 16, and 32d. These time points cover some additional stages in  
167 development including production, release and migration of daughter sporocysts. Our approach  
168 is distinctive in its focus on *in vivo* life cycle stages, the inclusion of both snails naturally infected  
169 from an endemic area in western Kenya and of laboratory-maintained snails, and the use of two

170 transcriptome technologies for co-validation of expression data. We examined specific groups of  
171 transcripts to gain distinctive insights on intramolluscan development. The database we provide  
172 should also provide helpful information in eventually achieving a deeper understanding of the  
173 interactome that is the essence of this dynamic host-parasite interaction.

174

## 175 **METHODS**

### 176 **Ethics statement and sample collection**

177 Details of recruitment and participation of human subjects for procurement of *S. mansoni*  
178 eggs from fecal samples collection are described in Mutuku et al. [30] and Buddenberg et al.  
179 [22]. The Kenya Medical Research Institute (KEMRI) Ethics Review Committee (SSC No. 2373)  
180 and the University of New Mexico (UNM) Institution Review Board (IRB 821021-1) approved all  
181 aspects of this project involving human subjects. All children found positive for *S. mansoni* were  
182 treated with praziquantel following standard protocols. This project was undertaken with  
183 approval of Kenya's National Commission for Science, Technology, and Innovation (permit  
184 number NACOSTI/P/15/9609/4270), National Environment Management Authority  
185 (NEMA/AGR/46/2014) and an export permit has been granted by the Kenya Wildlife Service  
186 (0004754).

187 Snail exposures for RNA-Seq experiments are described in detail in Buddenberg et al. [22].  
188 Briefly, field-collected *B. pfeifferi* were simultaneously exposed to 20 miracidia each from pooled  
189 fecal samples (5 individuals) for 1d and 3d. Field-collected, cercariae-producing snails were  
190 used for the shedding sample group. Biological triplicates were sequenced for each sample  
191 group using Illumina HiSeq 2000 (Illumina, Carlsbad CA) at the National Center for Genome  
192 Resources (NCGR) in Santa Fe, NM. In addition, one naturally shedding *B. pfeifferi* snail was  
193 sequenced on a 454 sequencer (Roche, Basel Switzerland) to improve *S. mansoni* transcript  
194 assembly but these sequences were not used for quantification. See Buddenberg et al. [22] for  
195 RNA extraction, library preparation, sequencing procedures, and sequencing summaries.

196

### 197 ***S. mansoni* microarray experiments**

198 The M-line strain of *B. glabrata* infected with *S. mansoni* PR1 strain was used in the  
199 microarray experiments to monitor parasite transcriptional changes that occur during infection.  
200 Both snail and trematode were maintained at UNM as previously described [31]. Snails were  
201 exposed to 10 miracidia each of *S. mansoni* for 2d, 4d, 8d, 16d, or 32d (shedding snails), with  
202 biological triplicate replicates for each time point. An uninfected *B. glabrata* group was also used  
203 to account for cross-hybridization from mixed snail-trematode samples. Total RNA was

204 extracted as previously described [32] and treated with DNase I (Ambion UK) to remove gDNA  
205 contamination. RNA was quantified on a NanoDrop ND-1000 spectrophotometer and quality-  
206 assessed using an Agilent 2100 bioanalyzer. cDNA synthesis, amplification, labeling, and  
207 hybridization were performed as previously described [32].

208 A publicly available *S. mansoni* microarray (NCBI GEO accession GPL6936) representing  
209 19,244 unique *S. mansoni* contigs (38,460 total experimental probes) was used with the  
210 following modification: all array probes were duplicated to allow for an added level of  
211 replicability. The transcript probes contained on the array were designed to profile 15 different  
212 developmental stages. Thus, many of the molecules likely important to larval development are  
213 present as well. Microarray images were recovered from a GenePix 4100A (Axon Instrument  
214 Inc.) dual channel laser scanner.

215 Raw data was averaged from replicates in each experimental group (2d, 4d, 8d, 16d, 32d),  
216 and for replicates in the uninfected snail group (Bg-only). For each experimental group, the  
217 mean and standard deviation were calculated, and values falling below one standard deviation  
218 from the mean were removed from further analysis. Features that were non-reactive for any of  
219 the groups used in this study, amounting to 26,581 probes, were removed as well as those that  
220 were cross-reactive with the Bg-only group (787 probes). The average Bg-only value was  
221 subtracted from experimental groups for each probe. Calculated expression values less than 1  
222 were removed from the analysis and the remaining values were transformed by log base 2.

223 An updated annotation of array features was performed using BLASTn with the NCBI  
224 nucleotide database (sequence identity >70%, E-value <10<sup>-06</sup>), BLASTp with the NCBI non-  
225 redundant protein database (sequence identity >40%, E-value <10<sup>-06</sup>). Array features were  
226 matched to their homologous *S. mansoni* transcript by BLASTn against the assembled *S.*  
227 *mansoni* transcripts. These homologous transcripts were used for analyses comparing across  
228 Illumina and array samples.

229

### 230 ***S. mansoni* transcriptome assembly and annotation**

231 An overview of our analysis pipeline is shown in S1 Fig. After pre-processing all Illumina  
232 reads, those from Illumina and 454 sequencing that did not map back to the *B. pfeifferi*  
233 transcriptome or identified symbionts were assembled into contigs (assembled, overlapping  
234 reads). The separation of host, parasite, and symbiont reads is described in detail in  
235 Buddenborg et al. [22]. We employed Trinity v2.2 RNA-Seq *de novo* assembler [33,34] for *de*  
236 *nov*o and genome-guided transcriptome assembling using paired-end reads only. The *S.*  
237 *mansoni de novo* assembly consisted of reads that did not map to the *B. pfeifferi* transcriptome

238 or symbionts after alignment with Bowtie2 v2.2.9 [35]. The genome-guided transcriptome  
239 assembly was performed using STAR v.2.5 2-pass alignment [36] to the *S. mansoni* genome  
240 (GeneDB: *S. mansoni* v5.2).

241

242 *Schistosoma mansoni* genome-guided and *de novo* Trinity assemblies were concatenated  
243 and redundancy reduced using CD-Hit-EST at 95% similarity [37]. The resulting sequences  
244 were screened against *B. glabrata* (VectorBase: BglaB1) and *S. mansoni* genomes, peptides,  
245 and mRNAs using BLASTx and BLASTn (sequence identity >70%, E-value < 10<sup>-12</sup>). Sequences  
246 with blast results to *B. glabrata* were removed and remaining *S. mansoni*-specific sequences  
247 are henceforth referred to as transcripts.

248 All assembled transcripts were annotated based on their closest homologs and predicted  
249 functional domains in the following databases and tools: BLASTp with NCBI non-redundant  
250 protein database (sequence identity >40%, E-value <10<sup>-06</sup>), BLASTn with NCBI nucleotide  
251 database (sequence identity >70%, E-value < 10<sup>-06</sup>), BLASTn consensus of top 50 hits  
252 (sequence identity >70%, E-value < 10<sup>-06</sup>), Gene Ontology [38], KEGG [39], and InterProScan5  
253 [40].

254 *Schistosoma mansoni* transcript-level quantification was calculated with RSEM (RNA-Seq  
255 by expectation maximization) [41] and TPM (Transcripts Per kilobase Million) values were used  
256 for downstream analyses. TPM is calculated by normalizing for transcript length and then by  
257 sequencing depth ultimately allowing us to compare the proportion of reads that mapped to a  
258 specific transcript [42,43]. Full Blast2Go [44] annotations were performed on all assembled *S.*  
259 *mansoni* transcripts.

260

## 261 **RESULTS AND DISCUSSION**

### 262 **Illumina-derived *S. mansoni* transcriptomic characteristics**

263 Throughout this discussion, a “transcript” is defined as assembled *S. mansoni* contigs  
264 formed from overlapping reads with the understanding that this includes both full-length  
265 transcripts, partial transcripts, and isoforms. For our Illumina-based study, a total of 23,602  
266 transcripts made up our combined genome-guided and *de novo* assembled *S. mansoni*  
267 intramolluscan transcriptome. Microarray and Illumina expression data can be found in S1 File.  
268 *Schistosoma mansoni* assembly metrics are provided in S1 Table. When all raw reads from  
269 each infected snail were mapped to the *S. mansoni* transcripts, 1d, 3d, and shedding replicates’  
270 mapping percentages ranged from 4.01-5.46, 1.48-4.05, and 4.36-9.72, respectively (S2 Fig).  
271 The principal component analysis (PCA) plot (S3 Fig) shows that the percentage of *S. mansoni*



272 reads varies, and that 1d and 3d groups show more variation between replicates than do  
273 shedding replicates. It is not surprising that the transcriptional responses among early replicates  
274 at 1 and 3d are more variable in this natural system involving both genetically variable snails and  
275 schistosomes, especially as compared to shedding snails which have reached a steady state of  
276 continued cercarial production. Also, because the parasite stages at 1 and 3d are small relative  
277 to their hosts, uniform sampling of their contributions may be harder to achieve.

278

279 S1 Table. RNA-Seq statistics and *S. mansoni de novo* assembly metrics

---

|                                                                    |                    |
|--------------------------------------------------------------------|--------------------|
| <b>Filtered reads used in <i>S. mansoni de novo</i> assemblies</b> | <b>222,593,797</b> |
| <b><i>De novo</i> assembled contigs</b>                            |                    |
| Trinity <i>de novo</i> Illumina                                    | 18,860             |
| Genome-guided Trinity <i>de novo</i> Illumina                      | 26,993             |
| Genome-guided Trinity <i>de novo</i> 454                           | 5,767              |
| <b><i>S. mansoni</i> transcripts</b>                               | <b>23,602</b>      |
| % GC                                                               | 35.40%             |
| N <sub>50</sub>                                                    | 1,412              |
| Median transcript length                                           | 479                |
| Average transcript length                                          | 841.92             |
| Transcripts ≥500nt                                                 | 11,419 (48.4%)     |

---

280

### 281 Overall Illumina and microarray *S. mansoni* transcript expression

282 Transcripts with  $\geq 1$  Log<sub>2</sub> TPM in at least one replicate per group in Illumina samples and  
283 features with fluorescence  $\geq 1$  in microarrays were considered for expression analyses. Based  
284 on these cutoffs, over fifteen thousand different transcripts representing 7,252 *S. mansoni*  
285 genes were detected in 1d *S. mansoni* infections. Following a dip in 3d samples, even more *S.*  
286 *mansoni* transcripts were expressed in shedding snails (Fig 1A). The decline noted in the 3d  
287 Illumina samples may reflect that at least one replicate returned fewer *S. mansoni* reads in  
288 general or may simply reflect a sampling consideration due to the small size of the parasites  
289 relative to the snail at this time point. Sustained expression of a large number of transcripts with  
290 a general trend towards higher expression in shedding snails was also noted in the microarray  
291 data (Fig 1B). Particularly for the Illumina results, some of the transcripts enumerated represent  
292 different portions of the same original full-length mRNAs as well as different isoforms, so the  
293 actual number of expressed genes is approximately half as many as the number of recorded  
294 transcripts. Nonetheless, the variety produced is impressive and generally supported by our  
295 microarray results as well (at least 6,000 features expressed at all time points).

296

297 Fig 1. (A) *Schistosoma mansoni* transcripts with  $\geq 1$  Log<sub>2</sub> TPM in at least one replicate per group  
298 in Illumina samples. (B) Array features with fluorescence  $\geq 1$  in microarray analyses.

299

300 Our datasets generated by Illumina and microarray analyses might be expected to return  
301 different results for at least four different reasons: 1) the two methods are totally different in  
302 approach; 2) the host snail species and *S. mansoni* strains differed; 3) the time points sampled  
303 differed; and 4) the transcripts represented on the array are more limited than whole  
304 transcriptomic sequencing provided by Illumina. However, they also provide independent views  
305 of the same basic process, so some comparisons are warranted, especially so for shedding  
306 snails when the same developmental stage could be compared between techniques. S4 Fig  
307 shows for shedding snails the positive correlation of microarray fluorescence in averaged  
308 replicates with  $\geq 1$  fluorescence (then Log<sub>2</sub> transformed) and Illumina RNA-Seq taking the  
309 average of replicates with  $\geq 1$  Log<sub>2</sub> TPM. The positive correlation between the two platforms at  
310 32d is a likely indication of the steady state of transcription achieved by *S. mansoni* at the stage  
311 of ongoing cercarial production. The venn diagram (S4 Fig) serves as a reminder of the greater  
312 overall coverage that is achieved in the Illumina samples.

313

314 Particularly noteworthy in both Illumina and array samples was that a large number of  
315 transcripts was shared across all time points (Fig 2). Among Illumina groups, >15% of all  
316 transcripts are expressed constitutively and among all microarray groups, >34% of all probes  
317 were expressed constitutively. This is suggestive of a core transcriptome required of  
318 schistosomes living in snails (see below for more details as to what comprises this core  
319 transcriptome). When comparing both early time points (1-4d) and shedding time points from  
320 both Illumina and array methods, venn diagrams not surprisingly indicate that Illumina RNA-Seq  
321 detects more *S. mansoni* transcripts (S5 Fig). In addition, S5 Fig shows less overlap in  
322 expression profiles between Illumina and array methods at early time points than for shedding  
323 snails, again suggestive of more variation amongst the sampled early time points for reasons  
324 already stated above.

325

326 Fig 2. (A) Venn diagrams of *S. mansoni* replicates from Illumina sample groups. (B) Venn  
327 diagram of *S. mansoni* transcripts with  $\geq 1$  Log<sub>2</sub>(TPM) in at least one replicate per group. (C)  
328 Venn diagram of expressed unique *S. mansoni* probes with  $>1$  log<sub>2</sub> fluorescence in the  
329 microarray.

330

### 331 **The intra-molluscan metabolic landscape**

332 After successful penetration of the snail host, digeneans alter their metabolism to depend  
333 completely on the resources available in the molluscan host and shift their energy budget  
334 towards sporocyst and/or rediae development. One of the unique evolutionary innovations of the  
335 Neodermata is the syncytial tegument, a vital aspect of digenean biology providing both  
336 protection and a highly efficient route to acquire nutrients from the host species [45]. Through  
337 the tegument, schistosomes acquire most nutrients and other key molecules via facilitated or  
338 active transport using transmembrane transporters [46]. Glucose transporters are expressed in  
339 both adult and larval stages of *S. mansoni* [47,48]. While miracidia in water employ aerobic  
340 energy metabolism, after 24 hours of *in vitro* cultivation, sporocysts shift their metabolism  
341 towards lactate production [49]. Expression of glucose transporters is particularly important in  
342 initial establishment (1d) and in shedding snails (Fig 3). By the 3d day post infection, the  
343 parasite up-regulates metabolic processes that are part of the purine salvage pathway and  
344 nucleotide biosynthesis, highlighting its transition to reproduction processes and mitosis. This is  
345 concurrent with a down-regulation of phosphorylation and general mitochondrial metabolic  
346 activities. This highlights the transition to the less aerobic regime within the host, and the shift to  
347 a tightly regulated reproductive program rather than active migration within the host or the  
348 environment. It has also been observed that daughter sporocysts have fewer mitochondria  
349 [50,51]. This shift to anaerobic mode of energy production is reversed by the presence of fully-  
350 formed cercariae developing in the sporocysts of actively shedding snails and is corroborated by  
351 the fact that aerobic respiration is especially active in the tails of cercariae [52]. This is expected  
352 due to the fact that cercariae, once released from the snail, have an active lifestyle and must  
353 generate enough energy from a limited amount of stored glycogen. Oxidative phosphorylation,  
354 aided by the greater availability of oxygen in the aquatic environment, helps cercariae fulfill their  
355 demanding energy requirements.

356

357 Fig 3. Glucose, amino acid, and nucleoside transmembrane transporters present in  
358 intramolluscan *S. mansoni* stages.

359

360 While obtaining organic carbon from the host fulfills the energetic requirements of the  
361 parasite, any actual growth is nitrogen dependent. Acquiring amino acids and other important  
362 building-block molecules is thus paramount to the parasite's fitness. Tegumental amino acid  
363 transporters have not been previously reported in *S. mansoni* sporocysts [46] but here we

364 provide evidence of the expression of several amino acid transporters across all intramolluscan  
365 time points, some of which may be tegumental. A glutamate transporter was the highest  
366 expressed amino acid transporter across all replicates in the Illumina samples. This is  
367 concurrent with an increase of amino acid biosynthesis by 3d which continues, but to a lesser  
368 degree in shedding snails (e.g. Alanine transaminase EC: 2.6.1.2, Glutamate Synthase EC  
369 1.4.1.13). Nucleoside transporters were also abundantly expressed, especially in shedding  
370 snails, as noted both by Illumina and microarray results.

371 Components of receptor-mediated endocytosis are present in the transcriptome of free-living  
372 and adult stages of *S. mansoni* [23]. Transcripts necessary for clathrin-mediated endocytosis,  
373 including clathrin assembly proteins, low-density lipoproteins, and adapter complex Ap2 were  
374 present in our intramolluscan transcriptome. The regulator of endocytosis, dynamin, was also  
375 present. These transcripts may be used in endocytosis to bring in lipids needed to make  
376 membranes. Expression of transcripts involved in receptor-mediated endocytosis, and possibly  
377 also in exocytosis, was high immediately upon miracidial transformation in 1d *S. mansoni*  
378 mother sporocysts.

379 We identified additional putative transmembrane transporters using the Transporter  
380 Classification Database ([www.tcdb.org](http://www.tcdb.org)) [53]. For microarray samples at 16d and 32d, two  
381 transmembrane NADH oxidoreductases and two annexins were most highly expressed (Fig 4).  
382 For Illumina samples, the most abundantly expressed transporters at 1d were AAA-ATPase and  
383 protein kinase superfamilies whereas the nuclear pore complex, H<sup>+</sup> or translocating NADH  
384 dehydrogenase, and endoplasmic reticular retrotranslocon families were dominant in 3d and  
385 shedding groups. ABC transporters were present in all Illumina samples, with 27 ABC  
386 transporter transcripts expressed in shedding snails. Three transcripts, identified as an ATP-  
387 binding cassette sub-family F member 2-like isoform X1, isoform X2, and ATP-binding cassette  
388 sub-family E member 1-like were highly expressed in every Illumina replicate. It has been  
389 suggested that ABC transporters serve an excretory function for adult schistosomes, playing a  
390 role in the removal of xenobiotics and/or influencing interactions with the definitive host [54]. The  
391 high expression of ABC transporters in intramolluscan stages, particularly in shedding snails,  
392 suggests they have an important and as yet not fully appreciated role in development. Perhaps  
393 they play a role in elimination of wastes associated with production of cercariae or facilitate  
394 release of factors that modify the immediate environment of the daughter sporocysts to favor  
395 their continued productivity of cercariae.

396

397 Fig 4. Transmembrane families/superfamilies represented in microarray samples.

398

399 Protein kinases phosphorylate intracellular proteins in order to alter gene expression and  
400 are responsible for many basic cellular functions. In schistosomes, kinases are predicted to play  
401 a role in host invasion, sensory behavior, growth, and development [55]. Because of their  
402 importance, kinases have been used as potential pharmaceutical targets against *S. mansoni*  
403 [56]. A BLASTx homology search of kinases from Kinase SARfari  
404 (<https://www.ebi.ac.uk/chembl/sarfari/kinasesarfari>) confirmed the representation of 19 kinases  
405 from 4 different superfamilies on the microarray, and 154 kinases belonging to 7 different  
406 superfamilies expressed in Illumina 1d, 3d, and shedding samples (S6 Fig). The highest  
407 expressed protein kinases are members of the group CMGC which includes MAPK growth and  
408 stress response kinases, cell cycle cyclin dependent kinases, and kinases for splicing and  
409 metabolic control.

410

#### 411 **Protease and protease inhibitor transcripts expressed at different stages of parasite** 412 **development**

413 The protease-encoding genes of parasitic helminths have undergone gene duplication and  
414 divergence, and by enabling helminths to process diverse proteinaceous substrates are  
415 believed to be critical to establishment and perpetuation of infection [57,58]. Helminth proteases  
416 and protease inhibitors have proven useful as markers for diagnostics purposes, or as targets  
417 for drugs or vaccines [58-60]. In the snail host, larval schistosomes use proteases for nutrient  
418 acquisition, to create the space needed for their expansive growth, and for defense functions,  
419 potentially destroying or inhibiting lytic host proteases [61]. Miracidia release proteases to  
420 facilitate entry into the snail host, often into dense tissue of the head-foot [62]. *In vitro* studies of  
421 cultured mother sporocysts have revealed secretion of proteases facilitating degradation of snail  
422 hemolymph proteins such as hemoglobin [61].

423 We observed that intramolluscan *S. mansoni* devotes considerable effort to making  
424 proteases and protease inhibitors with 397 protease transcripts and 77 protease inhibitor  
425 transcripts represented in at least one time point (Fig 5). Replicates of each Illumina time point  
426 with the lowest percentage of *S. mansoni* reads (1d-R1, 3d-R2, shedding-R3) also had the least  
427 abundant number of transcripts identified as proteases and protease inhibitors. One-day  
428 infections (see 1d-R2 and 1d-R3) with higher read counts indicative of robust development  
429 show expression of a gamut of *S. mansoni* proteases that somewhat surprisingly resemble  
430 those produced by *S. mansoni* in shedding snails. Coincidentally, we noted the snail host up-

431 regulated expression of protease inhibitors especially during larval establishment at 1d and 3d  
432 [22].

433

434 Fig 5. Intramolluscan expression of *S. mansoni* proteases and protease inhibitors organized by  
435 catalytic binding site for the proteases or MEROPS database clan for the protease inhibitors.  
436 Individual protease inhibitor clans contain inhibitors that have arisen from a single evolutionary  
437 origin. See <https://www.ebi.ac.uk/merops/inhibitors/> for details.

438

439 At all time points more *S. mansoni* proteases were present than protease inhibitors and, in  
440 general, protease inhibitors and proteases increased in abundance and expression as infection  
441 progressed. For both Illumina and microarray samples, shedding snails had both the greatest  
442 number of proteases and protease inhibitors expressed relative to other time points, and the  
443 highest expression levels of proteases and protease inhibitors.

444 As expected, elastases, an expanded family of serine proteases in *S. mansoni* [63], were  
445 the most highly expressed proteases in *S. mansoni* from both *B. glabrata* and *B. pfeifferi*  
446 shedding snails (Fig 6). We identified 9 elastase transcripts including those previously  
447 designated as cercarial elastases 1a and 2b and found in daughter sporocysts and cercariae  
448 [63]. Although elastases are known to be used in definitive host skin penetration, active  
449 translation of SmCE2b into protein sequences is seen prior to exiting the snail and was  
450 postulated to be involved in facilitating egress from the snail [63].

451

452 Fig 6. Prominent proteases of interest include elastases (A), leishmanolysins (B), and  
453 cathepsins (C).

454

455 Our data not only corroborate the presence of SmCE2b in shedding snails, but also reveal  
456 this and other *S. mansoni* elastases to be present at all time points we examined, in contrast to  
457 microarray results previously reported with early stage sporocysts from *in vitro* cultures [29]. For  
458 example, even at 1d (see 1d-R2) we found high expression of six *S. mansoni* elastases, some  
459 of which are those noted prominently in cercariae [63]. Our microarray samples also show  
460 expression of several elastases at all time points. It is not unusual to think that early-stage larval  
461 *S. mansoni* would express protease activity as they too must implement host penetration. Wu et  
462 al. [25] noted a conspicuous absence of elastase proteins in *in vitro* larval transformation  
463 products but other proteases present suggested an obvious degree of overlap between cercarial  
464 versus larval protease repertoires.

465 Leishmanolysin (also called invadolysin), a metalloprotease, is the second most abundant  
466 type of secreted protease of cercariae after elastases [64]. Functional studies of leishmanolyin  
467 in larval *S. mansoni* suggested this protease is capable of interfering with the migration of *B.*  
468 *glabrata* hemocytes and may influence the establishment of infection [65]. Leishmanolysin has  
469 also been detected among the proteins accompanying transformation of miracidia to mother  
470 sporocysts [25]. We detected leishmanolysin transcripts at all time points, and they were most  
471 abundant in shedding snails, likely indicative of their representation in developing cercariae (Fig  
472 6B).

473 Cathepsins are papain-like cysteine proteases and have been identified in the *S. mansoni*  
474 miracidia proteome, transforming miracidia, and mother sporocysts [61,66] and are implicated in  
475 tissue penetration, digestion and immune evasion in the definitive host [58,67-70]. Cathepsins  
476 take the place of tissue-invasive elastases in the cercariae of avian schistosomes [71]. Of two  
477 cathepsin B transcripts we noted, we found one expressed in all replicates except from 1d-R1  
478 and 3d-R2, the early-stages replicates noted to have lower *S. mansoni* read counts (Fig 6C).  
479 *Schistosoma mansoni* expresses cathepsin B in the flame cells of cercariae where they are  
480 believed to play a role in osmoregulation and/or secretion [72]. Cathepsin C, involved in  
481 acquisition of oligopeptides and free amino acids by larval schistosomes [73], was also  
482 identified by Illumina at 1d, 3d, and in shedding snails, with the exception of replicate 3d-R2  
483 which had a pre-patent amphistome infection. Cathepsins L1 and L3 were highly expressed by  
484 mother sporocyst stages (2d, 3d, 4d, 8d samples) in the microarray samples. At 16d, when  
485 daughter sporocysts are migrating through host tissue and hemolymph to the digestive gland,  
486 the proteases produced most closely resemble those from 32d shedding infections, including  
487 cathepsin C.

488 In contrast to proteases, there is relatively little information about protease inhibitors and  
489 their roles in parasite development and survival (see [59] for a thorough review of schistosome  
490 protease inhibitors). One of the better-characterized groups is the serine protease inhibitors  
491 (serpins; MEROPS clan ID, family I4) that may play a role in both post-translational regulation of  
492 schistosome proteases and defense against host proteases [74]. Serpins were expressed in all  
493 the time points sampled but we observed the highest expression of serpins at 1d and in  
494 shedding snails. The most abundant protease inhibitors in the Illumina samples (1d, 3d,  
495 shedding) were those that belong to the JF clan which is interesting because it is by no means  
496 the most abundantly represented clan, comprised of only one family called cytotoxic T-  
497 lymphocyte antigen-2-alpha (CTLA-2 $\alpha$ ), known to induce apoptosis of T-lymphoma cells in  
498 schistosome-infected mice [75]. This gene homolog is not represented on the *S. mansoni*

499 microarray which accounts for its absence in those samples. The homologous CTLA-2 $\alpha$   
500 transcripts expressed in the intramolluscan stages of *S. mansoni* may play a similar role in  
501 apoptosis or immunomodulation in snails to facilitate maintenance of long-term infections.

502 Transcripts identified as the protease inhibitor aprotinin (IB clan), a trypsin inhibitor, were  
503 moderately expressed in Illumina 1d-R2 and R3 replicates and in all replicates of shedding  
504 snails. In the plasma of *Biomphalaria*, the phenoloxidase enzyme laccase, whose activity is  
505 enhanced by trypsin, induces a negative impact on late (7-9 week) *S. mansoni* infections [76].  
506 We noted an up-regulation of snail-produced trypsins in *B. pfeifferi* shedding *S. mansoni*  
507 cercariae [22] as compared to uninfected controls. By inhibiting snail-produced trypsins, *S.*  
508 *mansoni* daughter sporocysts and/or developing cercariae within may disable an important snail  
509 defense strategy.

510

### 511 **The *S. mansoni* venom allergen-like proteins (SmVALs)**

512 The provocatively named venom allergen-like proteins (SmVAL2, 3/23, 9, 15, 26/28, and 27)  
513 have been identified as secreted larval transformation proteins [25]. SmVAL proteins can be  
514 found throughout miracidia and sporocyst parenchymal cell vesicles and in germinal cells with  
515 evidence for involvement in larval tissue remodeling and development by regulating snail matrix  
516 metalloproteinases [77]. One and 3d Illumina samples showed variable expression of SmVALs  
517 1, 11, 14, and 22 (Fig 7). Replicates from shedding snails had more consistent SmVAL profiles,  
518 with 14 different SmVAL homologs found among Illumina replicates and 9 SmVAL homologs in  
519 the 32d microarray samples. SmVAL1 was ubiquitously expressed across 1d, 3d, and shedding  
520 Illumina samples. Chalmers et al. [78] also noted abundant SmVAL transcripts in the infective  
521 stages of *S. mansoni*, namely miracidia and cercariae. SmVALs 4 and 24 transcripts, localized  
522 to the preacetabular glands of developing cercariae [79] were also the highest expressed  
523 SmVAL transcripts we found in shedding *S. mansoni*. SmVAL16 was localized close to the  
524 neural ganglia of adult male worms [79]; we detected its expression at 1d, 3d, and shedding  
525 time points. The repertoire of SmVAL proteins secreted during transformation may differ from  
526 the SmVAL transcripts being produced and this may account for the differences in the SmVAL  
527 transcripts we report here versus previously published proteomic findings.

528

529 Fig 7. The venom allergen-like proteins of intramolluscan *S. mansoni*

530

### 531 ***S. mansoni* intramolluscan G-protein coupled receptors (GPCRs)**



532 G-protein coupled receptors or GPCRs are the largest superfamily of transmembrane  
533 proteins in eukaryotes responsible for facilitating signaling affecting various downstream  
534 functions like development, reproduction, neuronal control of musculature and more [80,81]. As  
535 receptors, GPCRs are involved in mediating a variety of processes critical to schistosome  
536 survival including mediating host-parasite interactions, reproduction, and mating [82] (Liang et  
537 al. 2016). Praziquantel has been identified as a GPCR ligand acting to modulate serotonergic  
538 signaling [83]. Several *in silico* studies identifying and characterizing the *S. mansoni*  
539 “GPCRome” [84,85] culminated in the classification of a broad range of phylogenetically distinct  
540 clades/classes of GPCRs [86]. *S. mansoni* microarray studies have reported diverse expression  
541 patterns of individual GPCRs, with the overall highest expression occurring in 3-7 week worms,  
542 indicating that they are associated with complex stage-specific roles [29,86].

543 In intramolluscan stages, we identified 78 GPCR transcripts from our Illumina samples, and  
544 26 probes from microarray samples (Fig 8). Many (38%) of the Illumina GPCR transcripts were  
545 A FLPR-like, a GPCR class containing receptors similar to FMRFamide GPCRs that invoke  
546 muscle fiber contractions in schistosomes by increasing calcium transport across voltage-gated  
547 calcium channels [87]. Shedding snails had the most diverse representation of GPCRs. One  
548 transcript, homologous to an identified *S. mansoni* GPCR (Smp\_193810) with unknown  
549 function, was expressed at all time points with markedly high expression in both Illumina and  
550 microarray samples from shedding snails. A GPCR sensing the biogenic amine 5HT  
551 (Smp\_126730) and known to be distributed throughout the adult worm’s nervous system [80],  
552 was expressed at 1d and shedding Illumina samples (no homologous probe was found on the  
553 microarray). Its presence in intramolluscan stages suggests that serotonin-stimulated movement  
554 is essential throughout the life cycle of schistosomes. At 1d and shedding, a type 1 serotonin  
555 receptor is down-regulated in *B. pfeifferi* and at 3d, kynurenine 3-monooxygenase (important for  
556 its ability to degrade tryptophan and limit concentrations of serotonin) is up-regulated [22].  
557 Serotonin is a molecule of relevance to both the snail and parasite, and interference with its  
558 levels may be relevant to castration of snails (see concluding comments).

559

560 Fig 8. G-protein coupled receptors expressed in Illumina and microarray *S. mansoni*  
561 intramolluscan time points.

562

### 563 **Neuropeptides and neural development**

564 Studies on neuropeptides (peptide hormones) in planarian flatworms and their homologs  
565 in *S. mansoni* have identified their influence in locomotion, feeding, host location,

566 regeneration, and development [88,89]. Lu et al. [90] reported the expression of putative  
567 neuropeptides and transcripts suspected to be involved in neural development from paired  
568 and unpaired female and male adult worms. Seventeen transcripts were identified as  
569 neuropeptide receptors from the Illumina transcriptome, all of which were GPCRs (Fig 9).  
570 Neuropeptides and their receptors were mostly absent at 1d and 3d but abundant in  
571 shedding-R1 and R2. In shedding-R3, the replicate with a muted *S. mansoni* response, only  
572 one neuropeptide receptor (neuropeptide Y receptor) was expressed. Shedding-R3 was  
573 curious in that protein 7b2 and NPP-1 (GFVRIamide) prepropeptide were highly expressed.  
574 Only one putative neuropeptide precursor (NPP-1 prepropeptide) was identified on the  
575 microarray with only ~1 Log<sub>2</sub> fluorescence at 32d and was not present in any other sample.  
576 In adult worms, GFVRIamide is localized to neurons that run along the cerebral commissure  
577 towards the oral sucker [89]. Allatostatin receptor, a GPCR with ovary-specific transcription in  
578 adult *S. mansoni* [86], is important for reproductive development in *Schistosoma japonicum*  
579 adult females [91]. Four transcripts homologous to allatostatin receptor were expressed  
580 primarily in shedding *S. mansoni* replicates. Our results indicate expanded roles for  
581 neuropeptides and neural development transcripts previously uncharacterized in  
582 intramolluscan stages of *S. mansoni*.

583 We identified 33 of the 39 genes found to be involved in neural development by Lu et al.  
584 [90] in our Illumina *S. mansoni* transcriptome (Fig 9). Cell polarity proteins were the highest  
585 expressed transcripts involved in neural development at 1d, 3d, 16d, and shedding snails. 2d  
586 array *S. mansoni* showed little activity of transcripts related to neural development. In 4d and  
587 8d samples, notch and septate junction transcripts were the most highly expressed neural  
588 development transcripts. Notch transcripts are highly expressed in eggs but not in cercariae  
589 and are thought to be mainly involved in *S. mansoni* oogenesis and embryogenesis within the  
590 vertebrate host [92] but have been implicated in neurogenesis [23]. Lu et al. [90] found SOX to  
591 be transcribed in the ovary of paired and unpaired females and its expression in germ balls  
592 has also been established [93]. Three transcripts homologous to the *S. mansoni* SOX  
593 transcription factor were present predominantly in 1d and shedding time points reinforcing  
594 the role of SOX transcription in embryonic and germinal cell development.

595

596 Fig 9. Transcripts involved in neural development

597

598 **Transcripts associated with germinal cells and asexual reproduction of schistosomes in**  
599 **snails**

600 A prominent feature of the complex developmental program of sporocysts in snails is the  
601 presence of germinal cells that give rise to embryos that come to contain both the somatic cells  
602 that eventually divide to comprise the bodies of either sporocysts or cercariae and more  
603 germinal cells. These germinal cells are then poised to give rise to the next generation. None of  
604 this asexual polyembryonic process involves the formation of gametes or evidence of  
605 fertilization. Germinal cells in *S. mansoni* sporocysts have been shown to share common  
606 molecular features with planarian neoblasts or stem cells, prompting the suggestion that the  
607 digenetic nature of the life cycle of schistosomes and other digenetic trematodes may have  
608 evolved because of the adaptation of a system of preservation of these stem cell-like germinal  
609 cells [12].

610 Consistent with Wang et al. [12] we observed expression of fibroblast growth factor  
611 receptors (*fgfr*), *vasa*, *argonaute2* (*ago2*), and *nanos* transcripts shown to be associated with  
612 long-term maintenance of neoblast stem cells (Fig 10A). Expression of *fgfr2*, *argonaut-2* and  
613 especially *vasa* are expressed in all samples, suggestive of their importance in intramolluscan  
614 development. The microarray had an additional *fgfr* feature (*fgfr4*) that was not detected in the  
615 Illumina transcriptome. Our results are in agreement with Wang et al. [12] that *nanos-1* is not  
616 expressed in sporocysts, consistent with their suggestion that *nanos-1* expression is exclusive  
617 in adult *S. mansoni* [66]. *Nanos-2* expression was observed in every replicate of every time  
618 point with the exception of the 2d microarray sample. It has been proposed that there are two  
619 populations of germinal cells, *nanos*<sup>+</sup> and *nanos*<sup>-</sup>, with the latter population proliferating much  
620 more rapidly [12]. *Vasa* is needed for proliferation of both *nanos*<sup>+</sup> and *nanos*<sup>-</sup> stem cell  
621 populations and *ago2* is required for proliferation of only *nanos*<sup>-</sup> cells. It is hypothesized that the  
622 two populations exist for different purposes: one a more undifferentiated stem cell-like  
623 population and the other a more differentiated one ready to enter embryogenesis [94].

624

625 Fig 10. Transcripts associated with maintenance of neoblast stem cells in platyhelminthes (A)  
626 and transcripts potentially involved in meiosis and/or homologous recombination in asexually  
627 reproducing *S. mansoni* (B).

628

629 The proliferation of sporocysts and then cercariae by digenetic trematodes in snails is now  
630 generally considered to be an asexual process, one that does not involve gamete formation or  
631 fertilization [95], and it is frequently assumed that the progeny produced from a single  
632 miracidium are genetically the same. However, there are also persistent claims that the process  
633 is best considered as apomictic parthenogenesis [96]. Some observations indicate that the *S.*

634 *mansoni* cercariae arising from a single miracidium are not genetically identical but exhibit some  
635 variation with respect to representation of repetitive elements that has been attributed to mitotic  
636 recombination [97,98]. Khalil and Cable [99] examined germinal development in rediae of  
637 *Philopthalmus megalurus* and concluded the process was diploid parthenogenesis. They  
638 observed the presence of cells interpreted to be oögonia entering meiotic prophase I up to the  
639 stage of diakinesis that was then followed by the cell returning to interphase rather than  
640 proceeding through meiosis. Such a process might also allow for some recombination among  
641 the progeny produced during intramolluscan development.

642 Although the preponderance of evidence is surely against the occurrence of meiosis,  
643 gamete formation or fertilization during intramolluscan development [95], there may be peculiar  
644 remnants of these processes represented, especially considering that most accounts of the  
645 evolution of digenetic trematodes favor the interpretation that the ancestral state was likely the  
646 sexually reproducing adult worm which was followed at a later time by the addition of asexual  
647 proliferative larval development in molluscs [100]. Might there then be peculiar remnant  
648 signatures of meiosis in intramolluscan larvae? We identified homologs to two known meiosis  
649 prophase-specific transcripts in our Illumina samples (Fig 10B), which were originally  
650 characterized in mice: meiosis express protein 1 (MEIG1) known to be involved in  
651 chromosome/chromatin binding in meiosis [101] and highly expressed during meiosis prophase  
652 1 [102], and meiosis-specific nuclear structural protein 1 (MNS1). Anderson et al. [103] identified  
653 a MEIG transcript expressed in adult male and female *S. mansoni* with a potential role in  
654 gamete production but no possible functional role was suggested to explain its high expression  
655 in eggs. MNS1 is specifically expressed in mice during the pachytene stage of prophase 1 of  
656 meiosis. Retinoic acid (RA) initiates meiosis and although retinoic acid is not implicated in  
657 development of *S. mansoni*, we did see expression of retinoic acid receptor RXR. Of the  
658 putative meiosis stage-specific homologs, only RXR was present as a feature on the *S. mansoni*  
659 microarray, and it showed increasing expression as intramolluscan development progressed.  
660 Further study is warranted to learn if the transcripts we observed from intramolluscan stages are  
661 perhaps indicative of some tendency for occasional formation of bivalents without associated  
662 gamete formation or fertilization, or of a general repurposing of these molecules for use in many  
663 kinds of cellular reproduction, including asexual reproduction.

664 Six recombinase transcripts were expressed in our Illumina samples: three RAD51  
665 homologs, two cassette chromosome recombinase b homologs, and one trad-d4 homolog.  
666 Recombinases like RAD51 are up-regulated in the testis and ovary of adult *S. mansoni* as  
667 compared to whole worm controls [104] and in female adult *S. japonicum* when compared to

668 males [105]. Recombinases can repair breaks in DNA as a result of DNA damage or that occur  
669 during homologous recombination during meiosis. At least one transcript of another  
670 recombinase, topoisomerase II, was expressed in every time point. Among other functions,  
671 topoisomerase II interacts with the meiosis-specific RecA-like protein Dmc1 or RAD51 to  
672 facilitate pairing of homologous chromosomes during chromosome strand exchange [106].

673

### 674 **Glycosyltransferase expression in intramolluscan stages**

675 Molecular mimicry has been an area of interest with respect to schistosome-snail  
676 interactions since the early 1960s with the hypothesis that parasites express host-like molecules  
677 to evade host immune responses [107]. Several studies have highlighted antigenic similarities  
678 between miracidia and mother sporocysts and *B. glabrata* hemolymph proteins [108,109], and  
679 the glycans on *S. mansoni* glycoproteins and glycolipids have been extensively studied,  
680 including for their potential role in mediating host mimicry [25,110-114]. Yoshino et al. [115]  
681 showed that antibodies to *S. mansoni* glycotopes bound more extensively to cell-free  
682 hemolymph (plasma) from snails susceptible to infection than plasma from resistant strains, and  
683 suggested host-mimicking glycotopes could be a determining factor in compatibility during early  
684 larval stages. Consequently, we were interested in examining *S. mansoni* glycosyltransferases  
685 because of the role they play in generation of glycan moieties on lipids and proteins. Among  
686 others, one group of glycosyltransferases we found to be prominent in *S. mansoni* intramolluscan  
687 stages were fucosyltransferases (FTRs). Several of the surface membrane glycoconjugates of  
688 *S. mansoni* that interact with *B. glabrata* are fucosylated [116] and are suspected to be involved  
689 in host mimicry [110]. We found 22 unique Illumina-assembled FTRs transcripts and 8 fucosyl-  
690 transferase-specific probes represented on the microarray (Fig 11).

691

692 Fig 11. Fucosyltransferases of intramolluscan *S. mansoni*

693

694 Fitzpatrick et al. [29] observed two major clades of FTRs expressed by *S. mansoni*, those  
695 expressed in miracidia and mother sporocyst stages (alpha 1,6 fucosyltransferases D and E)  
696 and those expressed primarily in sexually mature adults (alpha 1,3 fucosyltransferases B, L, F).  
697 We did not observe an obvious stage-specific demarcation in FTRs expression but rather  
698 observed a broad range of FTR transcripts, including those Fitzpatrick et al. [29] observed  
699 primarily in sexually mature adults. They were expressed at all time points with highest diversity  
700 being at 1d and in shedding snails. Alpha 1,6 fucosyltransferase H was expressed ubiquitously  
701 across all Illumina and microarray samples. We also saw expression of five O-

702 fucosyltransferase transcripts exclusively at 1d and in shedding snails. O-fucosyltransferases  
703 add a fucose residue to the oxygen on a side chain of either serine or threonine residues in a  
704 glycoprotein. Heavy expression in shedding snails was not surprising because cercariae  
705 possess a prominent fucose-rich glycocalyx [117].

706 A transcriptional regulatory protein, KRAB-A domain-containing protein and dolichyl-  
707 diphosphooligosaccharide--protein glycosyltransferase subunit DAD1 homolog that performs  
708 post-translational protein glycosylation, were among the most abundantly expressed  
709 transcripts across all Illumina samples.

710

### 711 **Sporocyst defense and stress responses**

712 It is reasonable to expect that *S. mansoni* intramolluscan stages are under some duress  
713 from host immune responses, and we noted that snail Cu,Zn superoxide dismutases (SOD)  
714 were upregulated at both 1d and 3di in the highly compatible snail *B. pfeifferi* from which the *S.*  
715 *mansoni* Illumina transcripts discussed here were also obtained [22]. The H<sub>2</sub>O<sub>2</sub> resulting from  
716 SOD activity is known to be toxic to *S. mansoni* sporocysts [46,118] and is a main factor  
717 responsible for killing early larval *S. mansoni* in some *B. glabrata* resistant strains [46,118].  
718 Organisms can remove harmful intracellular hydrogen peroxide with catalases, glutathione  
719 peroxidases, and peroxiredoxins. Schistosomes lack catalases [119,120] and have low levels of  
720 glutathione peroxidases with limited antioxidant abilities [121]. It is suggested that  
721 peroxiredoxins are the schistosome's main defense against damage from hydrogen peroxide  
722 [122]. In our data, thioredoxin peroxidases, peroxiredoxins that scavenge H<sub>2</sub>O<sub>2</sub> using thioredoxin  
723 [123], are consistently (and highly) expressed throughout all time points in array and Illumina  
724 samples (Fig 12). Thioredoxin peroxidases reduce hydroperoxides with thioredoxin as a  
725 hydrogen donor. *S. mansoni* also expresses SOD activity and *S. mansoni*-encoded Mn- and  
726 Cu/Zn-type SODs are expressed in every replicate of both Illumina and array-sequenced  
727 samples (Fig 12). Because the abundance of *S. mansoni* SOD transcripts was consistently  
728 modest, we suggest that their function is not to mount an anti-snail counter-offensive but rather  
729 to take care of the intracellular anti-oxidative needs of the parasite.

730

731 Fig 12. Sporocyst defense and stress factors

732

733 Cytochrome P450 proteins have been associated with stress responses and in detoxification  
734 reactions. *Schistosoma mansoni* has but a single cytochrome P450-encoding gene and the  
735 associated protein activity has been shown to be essential for survival in both adult worms and

736 eggs, although its underlying function in schistosomes remains unclear [124]. Cytochrome P450  
737 transcripts showed minimal expression at 1d, were absent at 3d, and had modest (~3 Log<sub>2</sub>  
738 TPM) in all shedding replicates.

739 Heat shock proteins (HSPs) are often produced under conditions of stress, but they are also  
740 constitutively expressed in actively synthetic cells to serve as chaperones and to facilitate  
741 protein folding [125]. *Schistosoma mansoni* sHSPs 16 and 20 and HSPs 70 and 90 were all  
742 found among proteins released during *in vitro* miracidium to mother sporocyst transformation  
743 [25]. We found sHSPs 16, 20, and 40 and HSPs 60 and 70 but not 90, to be expressed  
744 throughout intramolluscan stages with the highest expression seen in HSPs 20, 40, and 70 (Fig  
745 12C). sHSP 20 contributes up to 15% of the soluble proteins of miracidia [126] and is a  
746 prominent protein identified in miracidia by LC-MS/MS [26]. sHSP 40 has been identified as a  
747 soluble egg antigen responsible for eliciting immunopathological reactions in the definitive host  
748 that result in granuloma formations [127]. Ishida and Jolly [128] showed that in the absence of  
749 HSP 70, cercariae do not orient or penetrate normally, providing additional functional roles for  
750 HSP 70 beyond stress responses. We noted that *S. mansoni* HSP 70 was expressed at high  
751 levels in cercariae-producing shedding samples.

752 In addition to defending themselves from attack by host immune components, in long-lived  
753 host-parasite associations as represented by *S. mansoni* in *B. pfeifferi*, it might also be  
754 reasonable to expect digenean sporocysts to contribute to the stability and maintenance of the  
755 host-parasite unit as a whole. Rediae of some digenean species do this in the form of actively  
756 attacking newly-colonizing trematode infections [129]. In complex, natural transmission foci such  
757 as the one from which our samples originated, *S. mansoni*-infected *B. pfeifferi* snails are  
758 constantly exposed to a variety of viruses, bacteria, and infectious eukaryotes [22]. Therefore, it  
759 seems reasonable that while imposing considerable stresses on its hosts, possibly including  
760 immunosuppression, that larval schistosomes might also be expected to contribute to the well-  
761 being of the host-parasite unit by expressing transcripts that contribute to repression or  
762 elimination of additional parasites.

763 One way to gain insight into *S. mansoni* sporocyst capabilities in this regard was to review  
764 what is known for free-living flatworms, such as the planarian *Dugesia japonica*, that are  
765 regularly challenged by pathogenic and non-pathogenic bacteria in their habitats. Planarians are  
766 capable of phagocytosing and destroying pathogens like *Staphylococcus aureus* and  
767 *Mycobacterium tuberculosis* [130,131]. Conserved homologs to human genes, such as MORN2  
768 (membrane occupation and recognition nexus-2 protein) are present and known to play a role in  
769 LC3-associated phagocytosis (LAP) elimination of bacterial pathogens in human macrophages

770 and in flatworms. Homologs of 34 transcripts of putative flatworm anti-bacterial factors [131]  
771 were expressed in *S. mansoni* intramolluscan stages (Fig 12D). Homologs to dual specificity  
772 phosphatases were the most prominent group of anti-bacterial factors. They were expressed at  
773 all time points, with a general increase in expression with development time. Homologs of  
774 MORN2 (membrane occupation and recognition nexus-2 protein) were also present throughout  
775 intramolluscan development. MORN2 plays a role elimination of bacterial pathogens in human  
776 macrophages as well as in flatworms. MORN2 is present in all replicates in 1d, 3d, and  
777 shedding *S. mansoni* samples. Shedding *S. mansoni* samples in both Illumina and microarray  
778 contain the most flatworm bacterial defense homologs. How these putative schistosome  
779 defense factors may be deployed in sporocysts that lack a gut and that do not engage in  
780 phagocytosis as far as we know, remains to be seen.

781 Among possible *S. mansoni* anti-immune factors we noted to be highly expressed in our  
782 samples was calreticulin, previously shown to be present in the excretory/secretory products of  
783 *S. mansoni* sporocysts (Fig 13). Because of its calcium-binding capability, Guillou et al. [132]  
784 suggested calreticulin may interfere with hemocyte spreading and interfere with their ability to  
785 initiate encapsulation responses.

786

787 Fig 13. Expression of calreticulin in *S. mansoni*

788

### 789 **Evidence of amphistome-mediated suppression of *S. mansoni* sporocyst development**

790 As noted in Buddenberg et al. [22], Illumina replicate 3d-R2 harbored a pre-patent infection  
791 of an amphistome species, presumptive *Paramphistomum sukari*, known to be common in *B.*  
792 *pfeifferi* in Kenya, including from the habitat from which these snails were obtained [133]. The  
793 presence of an amphistome infection is of interest because previous studies indicate that  
794 amphistomes and schistosomes interact in distinctive ways in the intramolluscan environment,  
795 with amphistomes having a permissive effect in enabling development of a schistosome that  
796 might not have otherwise developed in a particular snail species (e.g. [134]). In our context, the  
797 effect of the amphistome appears to be the opposite, based both on field results which suggest  
798 that amphistome infections supplant *S. mansoni* infections (Laidemitt, personal communication),  
799 and on our transcriptional results. In general, overall *S. mansoni* transcription in the 3d replicate  
800 with the amphistome was dampened relative to 3d replicates lacking the amphistome. This  
801 dampening took the form of both fewer numbers of *S. mansoni* transcripts expressed, and for  
802 those that were expressed, representation at lower copy numbers. It did not appear that specific  
803 highly expressed *S. mansoni* transcripts were targeted in any selected way by the presence of



804 the amphistome. In fact, the *S. mansoni* transcriptome in the amphistome-containing replicate  
805 most closely resembles that seen for *S. mansoni* in 1d infections (1d-R1), suggestive of an  
806 amphistome-imposed delay in development.

807

### 808 **Known unknowns and unknown unknowns**

809 Although many of the highly expressed transcripts found in our Illumina samples at 1d,  
810 3d, and shedding time points fell into one (or more) known functional categories, there  
811 remained several that either had an annotation and were not in one of our functional  
812 categories of interest or had no annotation and remain unknown. One of the advantages of a  
813 systematic sequencing approach is the discovery of transcripts for which we have no *a priori*  
814 knowledge yet that may play a key role in *S. mansoni* intramolluscan development.  
815 Transcripts with unknown characteristics are important to point out and briefly discuss  
816 because they may provide brand new insights into molecular functions not yet characterized  
817 but that may prove to be important for development and maintenance of infection in the snail  
818 host.

819 The transcripts we highlight in this section function in cytoskeletal maintenance, iron  
820 sequestration, oxidation-reduction, and transcription/protein regulation and modification.  
821 Cytoskeletal proteins tektin and tubulin beta chain were abundantly expressed in all Illumina  
822 *S. mansoni* samples. The tegument of the schistosome changes in shape and size and has  
823 to closely interact with its hosts, requiring cytoskeletal molecules to be continually recycled  
824 and renewed [40]. A gene, *nifu*, with homology to nitrogen fixation genes in bacteria, was  
825 highly expressed in all Illumina samples and it likely functions in the *de novo* synthesis of  
826 iron-sulfur clusters in mitochondria regulating cellular iron homeostasis [135]. Iron is  
827 sequestered by *S. mansoni* from its hosts and is known to be essential to several metabolic  
828 processes for adult development and reproduction [136]. Disrupting iron homeostasis has  
829 been an area of interest for therapeutics against schistosomes [137]. Two enzymes involved  
830 in the oxidation-reduction process were noted to be highly up-regulated in all samples:  
831 NADH-plastoquinone oxidoreductase and NADH ubiquinone oxidoreductase chain 3. A  
832 transcript identified as a putative stress associated endoplasmic reticulum protein was also  
833 highly expressed in all samples and is linked to the stabilization of membrane proteins during  
834 stress and facilitates subsequent glycosylation [138]. Lastly, an endothelial differentiation-  
835 related factor 1 transcript was constitutively expressed. It is also expressed preferentially in  
836 adult male *Schistosoma japonicum* worms [139].

837 The SmSPO-1 gene, first identified in late stage sporocysts [140], is present in all replicates  
838 and time points with increasing expression from mother sporocyst to cercariae production.  
839 SmSPO-1 is secreted as a lipid bilayer-binding protein that binds to host cell surfaces and  
840 induces apoptosis and has been well-characterized in cercariae during skin penetration [141]. In  
841 addition to penetrating host tissue, intramolluscan stages of *S. mansoni* must also expand into  
842 dense host tissue as they grow and must migrate from the head-foot to the digestive gland, all  
843 activities for which SmSPO-1 activity may be critical.

844 We also see several egg CP391B-like and egg CP391S-like transcripts expressed at 1d, 3d,  
845 and shedding *S. mansoni* samples. Egg proteins have been reported as differentially expressed  
846 in mother sporocyst stages when compared to free-living miracidia [27].

847 With respect to “unknown unknowns,” a *de novo* assembled transcript  
848 (TRINITY\_DN6450\_c0\_g1\_i1\_len=386\_path=[654]) had no annotation in any database and a  
849 targeted annotation revealed only that the transcript coded for a protein with a distinctive  
850 cytoplasmic, transmembrane helix, non-cytoplasmic, and another transmembrane helix. This  
851 transcript may be a novel and unique *B. pfeifferi* transmembrane protein.

852 Because the transcripts mentioned above are abundant in every replicate across all  
853 Illumina samples, they represent potential novel targets for eliminating or moderating *S.*  
854 *mansoni* parasite development within *Biomphalaria* snails.

855

## 856 **CONCLUDING COMMENTS**

857 As a miracidium penetrates a snail, it rapidly enters a radically different milieu from what it  
858 has previously experienced, and a number of pre-made proteins are released into its new  
859 surroundings to effect transition to the mother sporocyst stage adapted for intramolluscan  
860 existence [25,26,46]. Our 1d Illumina samples include many transcripts distinctive from the  
861 proteins associated with transformation, indicative of the switch to the needs of existence as  
862 sporocysts. As examples, we found representation of different SmVALs, heat shock proteins,  
863 protease transcripts (elastases), neural development proteins or neurohormones among 1d  
864 Illumina samples than seen as proteins in miracidial transformation products.

865 From our earliest Illumina samples, it is evident that *S. mansoni* orchestrates a complex  
866 transcriptional program within its snail hosts, with a significant percentage of its genetic  
867 repertoire (an estimated 66% of the *S. mansoni* genome) engaged (see also [23] who reports  
868 that 50-60% genes are expressed in each *S. mansoni* stage). This is particularly evident at the  
869 stage of production of cercariae, when large amounts of parasite tissue are present and  
870 production and differentiation of the relatively complex cercarial bodies are underway. Also

871 noteworthy is that a core transcriptome required of life in a snail host can be identified which  
872 includes transcripts involved in a central glycolysis pathway and the TCA cycle, and for  
873 transmembrane transporters for monosaccharides, amino acids, steroids, purines and  
874 pyrimidines, indicative of the dependence of sporocysts on their hosts for key molecular building  
875 blocks. Several of these like the amino acid transporters are noted for the first time in  
876 schistosome sporocysts. Metabolically, early stage schistosomes focus primarily on acquisition  
877 of molecular building blocks and nutrients with a distinct switch from storage to expending these  
878 components towards cercariae production in patent stage shedding *S. mansoni*. A role for  
879 receptor-mediated endocytosis in sporocyst nutrition should also not be excluded [142].  
880 Transcripts for enzymes required for macromolecular synthesis and cell proliferation, the latter a  
881 prominent and perpetual part of intramolluscan development and cercarial production, were also  
882 part of the core transcriptome. Oxidoreductase activity and cell redox homeostasis are among  
883 the most abundant functions across all larval stages of *S. mansoni*.

884 With respect to particular *S. mansoni* transcripts that may be key to successful  
885 intramolluscan development and/or that comprise parts of the “interactome” with snail  
886 transcripts, we highlight several findings below. First, by virtue of using both field-derived *B.*  
887 *pfeifferi* and *S. mansoni* from infected children, our Illumina study allows for a broader range of  
888 outcomes particularly as measured in the early stages of infection, and the variability that results  
889 can provide distinctive insights. For instance, cases where early sporocysts seem to be thriving  
890 with respect to read count are accompanied by production of larger quantities of factors  
891 associated with infectivity like proteases, fucosyltransferases, SmVALs, and GPCRs. Also, poor  
892 transcriptomic productivity for *S. mansoni* sporocysts has been associated with presence of  
893 other digenean species, unknown to us to be present at the time of exposure to *S. mansoni*, but  
894 that interfere with *S. mansoni* development [134] (Laidemitt, personal communication).

895 One of the surprising things about the genome of *S. mansoni* and of other parasitic  
896 helminths is the dearth of genes such as cytochrome P450s involved in degradation of  
897 xenobiotics (*S. mansoni* has but one such gene with unknown function), potentially including  
898 harmful-snail produced factors as well. The ABC transporters we have noted to be highly  
899 expressed in sporocysts may function to compensate [54].

900 Of particular interest was the expression of a diverse array of proteases and protease  
901 inhibitors at all intramolluscan stages, including some proteases like elastases characteristic of  
902 cercariae that were also produced by early sporocyst stages. The up-regulation by the snail host  
903 of protease inhibitors during the larval establishment period at 1d and 3d [22] seems a likely  
904 response to prevent parasite establishment. Also of note was expression of *S. mansoni*

905 protease inhibitors that might inhibit the action of snail trypsin-like proteases up-regulated late in  
906 infection [22]. These protease inhibitors may prevent the activation of the phenoloxidase  
907 enzyme laccase, whose activity induces a negative impact on late (7-9 week) *S. mansoni*  
908 infections [76].

909 G-coupled protein receptors (GPCRs) were also well represented in *S. mansoni*  
910 intramolluscan stages and are likely to play several important roles in schistosome  
911 development. One such GPCR is expressed at 1d and in shedding snails and is known to bind  
912 serotonin [143]. We noted at the same time points that *B. pfeifferi* down-regulated production of  
913 a type 1 serotonin receptor and additionally, at 3d kynurenine 3-monooxygenase which  
914 degrades tryptophan and can limit concentrations of serotonin is up-regulated [22]. It seems  
915 reasonable to continue to suspect serotonin of playing a role in parasitic castration. It stimulates  
916 egg production when given to castrated snails [144]. By expressing the appropriate serotonin  
917 GPCR, and possibly down-regulating the host receptor, *S. mansoni* sporocysts may limit  
918 availability of serotonin to the snail.

919 Other factors also worthy of additional consideration with respect to parasitic castration are  
920 *S. mansoni* neuropeptides Y and F and their receptors which were expressed particularly in  
921 shedding snails. In snails, neuropeptide Y has been associated with decreased egg production  
922 [145] and neuropeptide Y receptor was up-regulated at 1 day and in shedding *B. pfeifferi* snails  
923 [22]. Whether these neurotransmitters produced by *S. mansoni* might directly affect snail  
924 reproduction is not known. Ovipostatins which have a suppressive effect on egg laying in the  
925 snail *Lymnaea stagnalis* were found to be up-regulated in shedding *B. pfeifferi* so it is possible  
926 their expression may be targeted by *S. mansoni* in some manner as well. We did not see  
927 obvious changes in some snail neuroendocrine factors associated with reproduction like  
928 calfluxin or schistosomin [22]. Wang et al. [91] in a proteomic study of neuropeptides from *B.*  
929 *glabrata*, including snails with 12 day infections with *S. mansoni*, found lower levels of many  
930 snail reproductive neuropeptides. The extent to which *S. mansoni* and other digenetic  
931 trematodes might effect snail reproduction through interference with their neuroendocrine  
932 systems as proposed by de Jong-Brink [145] remains a topic worthy of more study. As noted by  
933 Humphries [21], it is also possible that castration is more a consequence of depletion of  
934 nutrients and alterations of metabolism imposed by metabolically demanding larval  
935 schistosomes.

936 Insights provided by the study of planarians were important to our interpretation of our  
937 results in two ways. The first was to confirm in intramolluscan *S. mansoni* samples the common  
938 expression of genes associated with maintenance of stem cell-like germinal cells, including

939 fibroblast growth factor receptors (*fgfr*), *vasa*, *argonaute2* (*ago2*), and *nanos-2* [12]. The second  
940 was to examine sporocysts for evidence of homologs of transcripts known to be involved in  
941 antibacterial responses in *Dugesia japonica* [131], for which 34 were found. Whether these  
942 factors are actually deployed in anti-bacterial or other defense responses remains to be seen.  
943 Their presence is somewhat peculiar because sporocysts lack phagocytic activity, unlike the gut  
944 cells of planarians. However, perhaps anti-bacterial proteins are deployed along sporocyst  
945 membranes, or sporocysts may engage in limited forms of endocytosis [142] that might result in  
946 engulfment of bacteria or their products. Possible anti-snail hemocyte factors like calreticulin  
947 [132] were also expressed by sporocysts. The possibility that sporocysts contribute to  
948 discouraging or preventing growth of third party symbionts that could compromise the snail-  
949 schistosome functional unit, especially in light of the need of schistosome sporocysts to  
950 compromise components of host immunity is also a topic worthy of additional study.

951 One advantage of next gen sequencing is its potential to provide unexpected insights. We  
952 were surprised to see two transcripts (MEIG1 and MNS1) associated specifically with prophase  
953 I of meiosis and discuss possible interpretations based on previous cytological studies of  
954 germinal cell development [99], observations that might help to explain differences among *S.*  
955 *mansoni* cercariae in genetic content [97]. The expression of recombinases in sporocysts might  
956 be consistent with a partial entry into meiosis up to diakinesis, or with mitotic recombination, the  
957 latter suggested by Grevelding [97] to account for genetic differences among cercariae derived  
958 from the same miracidium.

959 Finally, we note that many more highly represented transcripts were found, including those  
960 encoding both genes with suspected or unknown functions whose connection with  
961 intramolluscan development remain to be elucidated. With ever more complete transcriptional  
962 profiles becoming available for schistosomes in their snail hosts, the stage is set for further  
963 studies employing the best tools available for gene knockout to address the functional roles of  
964 these and the many other transcripts we and others have noted. Of particular interest will be to  
965 determine if ingenious use of this information can be made to specifically target and prevent the  
966 development of sporocysts and their production of human-infective cercariae, thereby opening a  
967 much-needed additional front in the effort to control and eliminate human schistosomiasis.

968

## 969 **ACKNOWLEDGMENTS**

970 We thank Joseph Kinuthia, Ibrahim Mwangi, and Martin Mutuku for assistance with  
971 collection of field samples. This paper was published with the approval of the Director of KEMRI.

972

973 S1 File. *Schistosoma mansoni* microarray and Illumina RNASeq expression data and annotation

974

975 S1 Fig. Overall assembly and differential expression pipeline for *S. mansoni* reads in dual RNA-  
976 Seq.

977

978 S2 Fig. (A) Read mapping statistics for each replicate of our *S. mansoni* transcriptome.

979 Percentage of all reads mapped are graphed on the left y-axis in dark bars and overall number

980 of reads graphed on the right y-axis in light bars. (B) Number of transcripts expressed above  $\geq 1$

981  $\text{Log}_2$  (TPM) in each Illumina sample replicate.

982

983 S3 Fig. PCA plot of all transcripts expressed in replicates from 1d, 3d, and shedding Illumina

984 groups.

985

986 S4 Fig. (A) Linear regression of 32d array probes measured in  $\text{log}_2$  fluorescence and shedding

987 Illumina expression results measured in  $\text{log}_2$  TPM. Only homologous probes and transcripts

988 were included in the scatterplot. (B) Venn diagram of shared and unique features expressed

989 between microarray and Illumina time points (32d).

990

991 S5 Fig. Venn diagram comparing expression results of early *S. mansoni* development

992

993 S6 Fig. *Schistosoma mansoni* kinases identified at 1d, 3d, and shedding time points, organized

994 by kinase family.

995 TK: phosphorylate tyrosine residues; TKL: "tyrosine kinase-like" serine-threonine protein kinases; STE: mostly protein

996 kinases involved in MAP (mitogen-activated protein) kinase cascades; CK1: casein kinases; AGC: cyclic-nucleotide-

997 dependent family (PKA, PKG), PKC, and relatives; CAMK: calcium/calmodulin modulation activity; CMGC: cyclin-

998 dependent kinases, MAP kinases, glycogen synthase kinases, and CDK-like kinases. The figure was generated using

999 KinomeRender.

1000

## 1001 REFERENCES

1002

1003 [1] Erasmus DA. The biology of trematodes. London: Crane, Russak; 1972.

1004

1005 [2] Basch PF. Schistosomes- development, reproduction and host relations. New York:  
1006 Oxford University Press, Inc.; 1991.

1007

1008 [3] Olson PD. Phylogeny and classification of the digenea (Platyhelminthes: Trematoda).

1009 Int. J. Parasitol. 2003;33: 733–755.

1010

- 1011 [4] Lee C-L, Lewert RM. The maintenance of *Schistosoma mansoni* in the laboratory. The  
1012 Journal of Infectious Diseases. 1956;99: 15-20.  
1013
- 1014 [5] Lewis FA, Stirewalt MA, Souza CP, Gazzinelli G. Large-scale laboratory maintenance of  
1015 *Schistosoma mansoni*, with observations on three schistosome/snail host combinations.  
1016 J Parasitol. 1986;72(6):813–29.  
1017
- 1018 [6] Berriman M, Haas BJ, LoVerde PT, Wilson RA, Dillon GP, Cerquerra GC, et al. The  
1019 genome of the blood fluke *Schistosoma mansoni*. Nature. 2009;460: 352-358. doi:  
1020 10.1038/nature08160  
1021
- 1022 [7] Protasio AV, Tsai IJ, Babbage A, Nichol S, Hunt M, et al. A systematically improved high  
1023 quality genome and transcriptome of the human blood fluke *Schistosoma mansoni*.  
1024 PLoS Negl Trop Dis. 2012;6: e1455. doi: 10.1371/journal.pntd.0001455  
1025
- 1026 [8] Adema CM, Hillier LW, Jones CS, Loker ES, Knight M, et al. Whole genome analysis of  
1027 a schistosomiasis-transmitting freshwater snail. Nature Communications. 2017;8: 1–11.  
1028 doi: 10.1038/ncomms15451  
1029
- 1030 [9] Brown DS. Freshwater Snails of Africa and their Medical Importance, 2nd. ed., London:  
1031 Taylor & Francis Ltd; 1994.  
1032
- 1033 [10] Schutte CHJ. Studies on the South African strain of *Schistosoma mansoni*-Part 2: the  
1034 intramolluscan larval stages. South African Journal of Science. 1974;70: 327-346.  
1035
- 1036 [11] Pan CT. *Schistosoma mansoni*: the ultrastructure of larval morphogenesis in  
1037 *Biomphalaria glabrata* and of associated host-parasite interactions. Japanese Journal of  
1038 Medical Science and Biology. 1996;49: 129–149.  
1039
- 1040 [12] Wang B, Collins JJ, Newmark PA. Functional genomic characterization of neoblast-like  
1041 stem cells in larval *Schistosoma mansoni*. eLife. 2013;2: e00768. doi:  
1042 10.7554/eLife.00768  
1043
- 1044 [13] Maldonado JF, Acosta-Matienzo J. Development of *Schistosoma mansoni* in the snail  
1045 intermediate host *Australorbis glabrata*. Puerto Rico Journal of Public Health and  
1046 Tropical Medicine. 1947;22: 331-373.  
1047
- 1048 [14] Wajdi N. Penetration by the miracidia of *S. mansoni* into the snail host. Journal of  
1049 Helminthology. 1966;40: 235-244.
- 1050 [15] Pan CT. Studies on the host-parasite relationship between *Schistosoma mansoni* and  
1051 the snail *Australorbis glabratus*. American Journal of Tropical Medicine and Hygiene.  
1052 1964;14: 931-976.  
1053
- 1054 [16] Cheng T, Bier J. Studies on molluscan schistosomiasis: An analysis of the development  
1055 of the cercaria of *Schistosoma mansoni*. Parasitology. 1972;64: 129-141.  
1056 doi:10.1017/S003118200004470X  
1057
- 1058 [17] Gérard C, Moné H, Théron A. *Schistosoma mansoni*-*Biomphalaria glabrata*: dynamics of  
1059 the sporocyst population in relation to the miracidial dose and the host size. Canadian  
1060 Journal of Zoology. 1993;71: 1880-1885. doi: 10.1139/z93-268  
1061

- 1062 [18] Frandsen F. Studies of the relationship between *Schistosoma* and their intermediate  
1063 hosts. III. The genus *Biomphalaria* and *Schistosoma mansoni* from Egypt, Kenya,  
1064 Sudan, Uganda, West Indies (St. Lucia) and Zaire (two different strains: Katanga and  
1065 Kinshasa). *Journal of Helminthology*. 1979;53: 321-348.  
1066
- 1067 [19] Jourdane J, Théron A, Combes C. Demonstration of several sporocysts generations as  
1068 a normal pattern of reproduction of *Schistosoma mansoni*. *Acta Tropica*. 1980;37: 177-  
1069 182.  
1070
- 1071 [20] Colley DG, Bustinduy AL, Secor WE, King CH. Human schistosomiasis. *The Lancet*.  
1072 2014;383: 2253-2264. doi: 10.1016/S0140-6736(13)61949-2  
1073
- 1074 [21] Humphries J. Effects of Larval Schistosomes on *Biomphalaria* Snails. In: Toledo R.,  
1075 Fried B. (eds) *Biomphalaria* snails and larval trematodes. New York: Springer; 2011  
1076 [https://doi.org/10.1007/978-1-4419-7028-2\\_5](https://doi.org/10.1007/978-1-4419-7028-2_5)  
1077
- 1078 [22] Buddenborg SK, Bu L, Zhang S-M, Schilkey FD, Mkoji GM, Loker ES. Transcriptomic  
1079 responses of *Biomphalaria pfeifferi* to *Schistosoma mansoni*: investigation of a neglected  
1080 African snail that supports more *S. mansoni* transmission than any other snail species.  
1081 *PLoS Neglected Tropical Diseases*. 2017;11: e0005984 doi:  
1082 10.1371/journal.pntd.0005984  
1083
- 1084 [23] Verjovski-Almeida S, DeMarco R, Martina EAL, Guimarães PEM, Ojopi EPB, Paquola  
1085 ACM, et al. Transcriptome analysis of the acoelomate human parasite *Schistosoma*  
1086 *mansoni*. *Nature genetics*. 2003;35: 148-157. doi: 10.1038/ng1237  
1087
- 1088 [24] Vermeire JJ, Taft AS, Hoffman KF, Fitzpatrick JM, Yoshino, TP. *Schistosoma mansoni*:  
1089 DNA microarray gene expression profiling during the miracidium-to-mother sporocyst  
1090 transformation. *Molecular and Biochemical Parasitology*. 2006;147:39-47. doi:  
1091 10.10016/j.molbiopara.2006.01.006  
1092
- 1093 [25] Wu X-J, Sabat G, Brown JF, Zhang M, Taft A, Peterson N, et al. Proteomic analysis of  
1094 *Schistosoma mansoni* proteins released during *in vitro* miracidium-to-sporocyst  
1095 transformation. *Molecular & Biochemical Parasitology*. 2009;164: 32–44. doi:  
1096 10.1016/j.molbiopara.2008.11.005  
1097
- 1098 [26] Wang T, Zhao M, Rotgans BA, Strong A, Liang D, Ni G, et al. Proteomic analysis of the  
1099 *Schistosoma mansoni* miracidium. *PLoS One*. 2016;11: e0147247.  
1100 doi:10.1371/journal.pone.0147247
- 1101 [27] Williams DL, Sayed AA, Bernier J, Birkeland SR, Cipriano MJ, Papa AR, et al.  
1102 Profiling *Schistosoma mansoni* development using Serial Analysis of Gene Expression  
1103 (SAGE). *Experimental Parasitology*. 2007;117:246-258. doi:  
1104 10.1016/j.exppara.2007.05.001  
1105
- 1106 [28] Taft AS, Vermeire JJ, Bernier J, Birkeland SR, Cipriano MJ, Papa AR, et al.  
1107 Transcriptome analysis of *Schistosoma mansoni* larval development using serial  
1108 analysis of gene expression (SAGE). *Parasitology*. 2009;136: 469-485. doi:  
1109 10.1017/S0031182009005733  
1110



- 1111 [29] Fitzpatrick JM, Peak E, Perally S, Chalmers IW, Barrett J, Yoshino TP, et al. Anti-  
1112 schistosomal Intervention Targets Identified by Lifecycle Transcriptomic Analyses. PLoS  
1113 Negl Trop Dis. 2009;3: e543–19. doi: 10.1371/journal.pntd.0000543  
1114
- 1115 [30] Mutuku MW, Dweni CK, Mwangi M, Kinuthia JM, Mwangi IN, Maina G, et al. Field-  
1116 derived *Schistosoma mansoni* and *Biomphalaria pfeifferi* in Kenya: A compatible  
1117 association characterized by lack of strong local adaptation, and presence of some  
1118 snails able to persistently produce cercariae for over a year. Parasites & Vectors.  
1119 2014;7: 485–13. doi: 10.1186/s13071-014-0533-3  
1120
- 1121 [31] Stibbs HH, Owczarzak A, Bayne CJ, DeWan P, DeWan P. Schistosome sporocyst-killing  
1122 Amoebae isolated from *Biomphalaria glabrata*. Journal of Invertebrate Pathology.  
1123 1979;33: 159–170.  
1124
- 1125 [32] Hines-Kay J, Cupit PM, Sanchez MC, Rosenberg GH, Hanelt B, Cunningham C.  
1126 Transcriptional analysis of *Schistosoma mansoni* treated with praziquantel in vitro.  
1127 Molecular and Biochemical Parasitology. 2012;186: 87-94. doi:  
1128 10.1016/j.molbiopara.2012.09.006  
1129
- 1130 [33] Grabherr MG, Haas BJ, Yassour M, Levin JZ, Thompson DA, Amit I, et al. Full-length  
1131 transcriptome assembly from RNA-Seq data without a reference genome. Nat  
1132 Biotechnol. 2011;29: 644–652. doi: 10.1038/nbt.1883  
1133
- 1134 [34] Haas BJ, Papanicolaou A, Yassour M, Grabherr M, Blood PD, Bowden J, et al. *De novo*  
1135 transcript sequence reconstruction from RNA-seq using the Trinity platform for reference  
1136 generation and analysis. Nature Protocols. 2013;8: 1494–1512. doi:  
1137 10.1038/nprot.2013.084  
1138
- 1139 [35] Langmead B, Salzberg SL. Fast gapped-read alignment with Bowtie 2. Nat Meth.  
1140 2012;9: 357–359. doi: 10.1038/nmeth.1923  
1141
- 1142 [36] Dobin A, Davis CA, Schlesinger F, Drenkow J, Zaleski C, Jha S, et al. STAR: ultrafast  
1143 universal RNA-seq aligner. Bioinformatics. 2012;29: 15–21. doi:  
1144 10.1093/bioinformatics/bts635  
1145
- 1146 [37] Fu L, Niu B, Zhu Z, Wu S, Li W. CD-HIT: accelerated for clustering the next generation  
1147 sequencing data. Bioinformatics. 2012;28:3150-3152. doi:  
1148 10.1093/bioinformatics/bts565.  
1149
- 1150 [38] Ashburner M, Ball CA, Blake JA, Botstein D, Butler H, Cherry JM, et al. Gene Ontology:  
1151 tool for the unification of biology. Nat Genet. 2000;25: 25–29. doi: 10.1038/75556  
1152 [39] Kanehisa M, Sato Y, Kawashima M. KEGG as a reference resource for gene and protein  
1153 annotation. Nucleic acids. 2015;28: 27-30  
1154
- 1155 [40] Jones MK, Gobert GN, Zhang L, Sunderland P, McManus DP. The cytoskeleton and  
1156 motor proteins of human schistosomes and their roles in surface maintenance and host-  
1157 parasite interactions. Bioessays. 2004;26: 752–765. doi: 10.1002/bies.20058  
1158
- 1159 [41] Li B, Dewey CN. RSEM: accurate transcript quantification from RNA-Seq data with or  
1160 without a reference genome. BMC Bioinformatics. 2011;12: 323–323. doi: 10.1186/1471-  
1161 2105-12-323

- 1162  
1163 [42] Li B, Ruotti V, Stewart RM, Thomson JA, Dewey CN. RNA-Seq gene expression  
1164 estimation with read mapping uncertainty. *Bioinformatics*. 2010;26: 493-500. doi:  
1165 10.1093/bioinformatics/btp692  
1166
- 1167 [43] Shalek AK, Satija R, Adiconis X, Gertner RS, Gaublomme JT, Raychowdhury R, et al.  
1168 Single-cell transcriptomics reveals bimodality in expression and splicing in immune cells.  
1169 *Nature*. 2013; 498: 236-240. doi: 10.1038/nature12172  
1170
- 1171 [44] Götz S, García-Gómez JM, Terol J, Williams TD, Nagaraj SH, Nueda MJ, et al. High-  
1172 throughput functional annotation and data mining with the Blast2GO suite. *Nucleic Acids*  
1173 *Research*. 2008;36: 3420-3435. doi: 10.1093/nar/gkn176  
1174
- 1175 [45] Laumer CE, Hejnal A, Giribet G. Nuclear genomic signals of the 'microturbellarian' roots  
1176 of platyhelminth evolutionary innovation. *eLife*. 2015;4: e05503.  
1177 doi: 10.7554/eLife.05503  
1178
- 1179 [46] Yoshino TP, Gourbal B, Théron A. *Schistosoma* Sporocysts. In: Jamieson BGM, editor.  
1180 *Schistosoma: Biology, Pathology, and Control*. CRC Press; 2017. pp. 118-148.  
1181
- 1182 [47] Zhong C, Skelly PJ, Leaffer D, Cohn RG, Caulfield JP, Shoemaker CB.  
1183 Immunolocalization of a *Schistosoma mansoni* facilitated diffusion glucose transporter to  
1184 the basal, but not the apical, membranes of the surface syncytium. *Parasitology*  
1185 1995;110(Pt 4):383-94.  
1186
- 1187 [48] Boyle JP, Wu X-J, Shoemaker CB, Yoshino TP. Using RNA interference to manipulate  
1188 endogenous gene expression in *Schistosoma mansoni* sporocysts. *Molecular &*  
1189 *Biochemical Parasitology*. 2003;128: 205-215  
1190
- 1191 [49] Tielens AG1, Horemans AM, Dunnewijk R, van der Meer P, van den Bergh SG. The  
1192 facultative anaerobic energy metabolism of *Schistosoma mansoni* sporocysts. *Mol*  
1193 *Biochem Parasitol*. 1992;56: 49-57.  
1194
- 1195 [50] Basch P, DiConza J. The miracidium-sporocyst transition in *Schistosoma mansoni*:  
1196 Surface changes *in vitro* with ultrastructural correlation. *The Journal of Parasitology*.  
1197 1974;60: 935-941. doi: 10.2307/3278518  
1198
- 1199 [51] Smith J, Chernin E. Ultrastructure of young mother and daughter sporocysts of  
1200 *Schistosoma mansoni*. *The Journal of Parasitology*. 1974;60: 85-89. doi:  
1201 10.2307/3278683
- 1202 [52] Skelly PJ, Shoemaker CB. A molecular genetic study of the variations in metabolic  
1203 function during schistosome development. *Memórias do Instituto Oswaldo Cruz*.  
1204 1995;90: 281-284. doi: 10.1590/S0074-02761995000200027  
1205
- 1206 [53] Saier MH, Reddy VS, Tsu BV, Ahmed MS, Li C, Moreno-Hagelsieb G. The Transporter  
1207 Classification Database (TCDB): recent advances. *Nucleic Acids Res*. 2016; 44: D372-9  
1208
- 1209 [54] Kusel JR, McVeigh P, Thornhill JA. The schistosome excretory system: a key to  
1210 regulation of metabolism, drug excretion and host interaction. *Trends in Parasitology*.  
1211 2009;25:353-8.  
1212

- 1213 [55] Walker AJ, Ressurreição M, Rothermel R. Exploring the function of protein kinases in  
1214 schistosomes: perspectives from the laboratory and from comparative genomics.  
1215 *Frontiers in Genetics*. 2014;5: 229. doi: 10.3389/fgene.2014.00229  
1216
- 1217 [56] Dissous C, Ahier A, Khayath N. Protein tyrosine kinases as new potential targets against  
1218 human schistosomiasis. *Bioessays*. 2007;29:1281-8. doi: 10.1002/bies.20662  
1219
- 1220 [57] Tort J, Brindley PJ, Knox D, Wolfe KH, Dalton JP. Proteinases and associated genes of  
1221 parasitic helminths. *Advances in Parasitology*. 1999;43: 161-266. doi: 10.1016/S0065-  
1222 308X(08)60243-2  
1223
- 1224 [58] Dalton JP, Caffrey CR, Sajid M, Stack C, Donnelly S, Loukas A, et al. Proteases in  
1225 trematode biology. In: Maule AG, Marks NJ, editors. *Parasitic Flatworms: Molecular  
1226 Biology, Biochemistry, Immunology and Physiology*. CAB International; 2006. pp 348-  
1227 368.  
1228
- 1229 [59] Ranasinghe SL, McManus DP. Protease inhibitors of parasitic flukes: emerging roles in  
1230 parasite survival and immune defence. *Trends in Parasitology*. 2017;33: 400-413. doi:  
1231 10.1016/j.pt.2016.12.013  
1232
- 1233 [60] Tandon V, Das B, Kumar S. Proteases of Parasitic Helminths: Their Metabolic Role in  
1234 Establishment of Infection in the Host. In: Chakraborti S, Chakraborti T, Dhalla N,  
1235 editors. *Proteases in Human Diseases*. Springer, Singapore; 2017.  
1236
- 1237 [61] Yoshino TP, Lodes MJ, Rege AA, Chappell CL. Proteinase activity in miracidia,  
1238 transformation excretory-secretory products, and primary sporocysts of *Schistosoma  
1239 mansoni*. *Journal of Parasitology*. 1993;79: 23-31.  
1240
- 1241 [62] Grevelding CG. Transgenic Flatworms. In: Maule AG, Marks NJ, editors. *Parasitic  
1242 Flatworms: Molecular Biology, Biochemistry, Immunology and Physiology*. CAB  
1243 International; 2006.  
1244
- 1245 [63] Ingram JR, Rafi SB, Eroy-Reveles AA, Ray M, Lambeth L, Hsieh I et al. Investigation of  
1246 the proteolytic functions of an expanded cercarial elastase gene family  
1247 in *Schistosoma mansoni*. *PLoS Negl Trop Dis*. 2012;6: e1589. doi:  
1248 10.1371/journal.pntd.0001589.  
1249
- 1250 [64] Curwen RS, Ashton PD, Sundaralingam S, Wilson RA. Identification of novel proteases  
1251 and immunomodulators in the secretions of schistosome cercariae that facilitate host  
1252 entry. *Molecular and Cellular Proteomics*. 2006;5: 835-844. doi: 10.1074/mcp.M500313-  
1253 MCP200  
1254
- 1255 [65] Kabore AL. Characterization of the roles of leishmanolysin and venom-allergen-like  
1256 proteins during the infection of *Biomphalaria glabrata* by *Schistosoma mansoni*. M.Sc.  
1257 Thesis, University of Alberta. 2016. Available from  
1258 <https://era.library.ualberta.ca/files/c6h440s76x#.WoTa1JM-cWo>  
1259
- 1260 [66] Wang J, Collins JJ III. Identification of new markers for the *Schistosoma mansoni*  
1261 vitelline lineage. *International Journal for Parasitology*. 2016;46: 405-410. doi:  
1262 10.1016/j.ijpara.2016.03.004  
1263

- 1264 [67] Sajid M, McKerrow JH. Cysteine proteases of parasitic organisms. *Mol Biochem*  
1265 *Parasitol.* 2002;120: 1-21.  
1266
- 1267 [68] Caffrey CR, Salter JP, Lucas KD, Khiem D, Hsieh I, Lim KC, et al. SmCB2, a novel  
1268 tegumental cathepsin B from adult *Schistosoma mansoni*. *Mol Biochem*  
1269 *Parasitol.* 2002;121: 49-61.  
1270
- 1271 [69] Delcroix M, Sajid M, Caffrey CR, Lim K-C, Dvořák J, Hsieh I, et al. A multienzyme  
1272 network functions in intestinal protein digestion by a platyhelminth parasite. *Journal of*  
1273 *Biological Chemistry.* 2006;281: 39316-39329. doi: 10.1074/jbc.M607128200  
1274
- 1275 [70] Kašný M, Mikeš L, Hampel V, Dvořák J, Caffrey CR, Dalton JP, Horák P. Peptidases of  
1276 trematodes. *Advances in Parasitology.* 2009;69: 205-297. doi: 10.1016/S0065-  
1277 308X(09)69004-7  
1278
- 1279 [71] Dolečková K, Albrecht T, Mikeš L, Horák P. Cathepsins B1 and B2 in the  
1280 neuropathogenic schistosome *Trichobilharzia regenti*: distinct gene expression profiles  
1281 and presumptive roles throughout the life cycle. *Parasitol Res.* 2010;107: 751-755. doi:  
1282 10.1007/s00436-010-1943-6  
1283
- 1284 [72] Caffrey CR, Ruppel A. Cathepsin B-like activity predominates over cathepsin L-like  
1285 activity in adult *Schistosoma mansoni* and *S. japonicum*. *Parasitol Res.* 1997;83: 632-  
1286 635.  
1287
- 1288 [73] Skelly PJ, Shoemaker CB. *Schistosoma mansoni* proteases Sm31 (cathepsin B) and  
1289 Sm32 (legumain) are expressed in the cecum and protonephridia of cercariae. *Journal of*  
1290 *Parasitology.* 2001;87: 1218-1221. doi: 10.1645/0022-  
1291 3395(2001)087[1218:SMPSCB]2.0.CO;2  
1292
- 1293 [74] Quezada LAL, McKerrow JH. Schistosome serine protease inhibitors: parasite defense  
1294 or homeostasis? *Annals of the Brazilian Academy of Sciences.* 2011;83: 663-672. Doi:  
1295 10.1590/S0001-37652011000200025  
1296
- 1297 [75] Zhang L, Yun H, Murray F, Lu R, Wang L, Hook V, Insel PA. Cytotoxic T lymphocyte  
1298 antigen-2 alpha induces apoptosis of murine T-lymphoma cells and cardiac fibroblasts  
1299 and is regulated by cAMP/PKA. *Cellular Signaling.* 2011;23: 1611-1616. doi:  
1300 10.1016/j.cellsig.2011.05.014  
1301
- 1302 [76] Le Clec'h W, Anderson TJC, Chevalier FD. Characterization of hemolymph  
1303 phenoloxidase activity in two *Biomphalaria* snail species and impact of *Schistosoma*  
1304 *mansoni* infection. *Parasit Vectors.* 2016;9:32. doi: 10.1186/s13071-016-1319-6  
1305
- 1306 [77] Yoshino TP, Brown M, Wu X-J, Jackson CJ, Ocadiz-Ruiz R, Chalmers IW, et al.  
1307 Excreted/secreted *Schistosoma mansoni* venom allergen-like 9 (SmVAL9) modulates  
1308 host extracellular matrix remodeling gene expression. *International Journal for*  
1309 *Parasitology.* 2014;44: 551-563. doi: 10.1016/j.ijpara.2014.04.002.  
1310
- 1311 [78] Chalmers IW, McArdle AJ, Coulson RM, Wagner MA, Schmid R, Hirai H, Hoffmann KF.  
1312 Developmentally regulated expression, alternative splicing and distinct sub-groupings in  
1313 members of the *Schistosoma mansoni* venom allergen-like (SmVAL) gene family. *BMC*  
1314 *Genomics.* 2008;9, 89. doi: 10.1186/1471-2164-9-89

- 1315  
1316 [79] Fernandes RS, Barbosa TC, Barbosa MMF, Miyasato PA, Nakano E, Leite LCC, et al.  
1317 Stage and tissue expression patterns of *Schistosoma mansoni* venom allergen-like  
1318 proteins SmVAL 4, 13, 16 and 24. *Parasites & Vectors*. 2017;10: 223.  
1319  
1320 [80] Patocka N, Sharma N, Ribeiro P. Serotonin signaling in *Schistosoma mansoni*: A  
1321 serotonin-activated G protein-coupled receptor controls parasite movement. *PLoS*  
1322 *Pathogens*. 2014;10: e1003878. doi: 10.1371/journal.ppat.1003878  
1323  
1324 [81] Farran B. An update on the physiological and therapeutic relevance of GPCR oligomers.  
1325 *Pharmacological Research*. 2017;117: 303-327. doi: 10.1016/j.phrs.2017.01.008  
1326  
1327 [82] Liang D, Zhao M, Wang T, McManus DP, Cummins SF. GPCR and IR genes in  
1328 *Schistosoma mansoni* miracidia. *Parasites & Vectors*. *Parasites & Vectors*; 2016;9: 1–  
1329 12. doi: 10.1186/s13071-016-1837-2  
1330  
1331 [83] Chan JD, Cupid PM, Gunaratne GS, McCorvy JD, Yang Y, Stoltz K, et al. The  
1332 anthelmintic praziquantel is a human serotoninergic G-protein-coupled receptor ligand.  
1333 *Nature Communications*. 2017;8. doi: 10.1038/s41467-017-02084-0  
1334  
1335 [84] Zamanian M, Kimber MJ, McVeigh P, Carlson SA, Maule AG, Day TA. The repertoire of  
1336 G protein-coupled receptors in the human parasite *Schistosoma mansoni* and the model  
1337 organism *Schmidtea mediterranea*. *BMC Genomics*. 2011;12: 1–21. doi: 10.1186/1471-  
1338 2164-12-596  
1339  
1340 [85] Campos TDL, Young ND, Korhonen PK, Hall RS, Mangiola S, Lonie A, et al.  
1341 Identification of G protein-coupled receptors in *Schistosoma haematobium* and *S.*  
1342 *mansoni* by comparative genomics. *Parasites & Vectors*. 2014;7: 242–11. doi:  
1343 10.1186/1756-3305-7-242  
1344  
1345 [86] Hahnel S, Wheeler N, Lu Z, Wangwiwatsin A, McVeigh P, Maule A, et al. Tissue-specific  
1346 transcriptome analyses provide new insights into GPCR signalling in adult *Schistosoma*  
1347 *mansoni*. *PLoS Pathog*. 2018;14: e1006718–13. doi: 10.1371/journal.ppat.1006718  
1348  
1349 [87] Novozhilova E, Kimber MJ, Qian H, McVeigh P, Robertson AP, Zamanian M, Maule AG,  
1350 Day TA. FMRFamide-Like Peptides (FLPs) Enhance Voltage-Gated Calcium Currents to  
1351 Elicit Muscle Contraction in the Human Parasite *Schistosoma mansoni*. *PLoS NTD*.  
1352 2010;4: e790. doi: 10.1371/journal.pntd.0000790  
1353  
1354 [88] Collins JJ III, Hou X, Romanova EV, Lambrus BG, Miller CM, Saberi A, et al. Genome-  
1355 wide analyses reveal a role for peptide hormones in planarian germline development.  
1356 *PLoS Biology*. 2010;8(10): e1000509. <https://doi.org/10.1371/journal.pbio.1000509>  
1357  
1358 [89] McVeigh P, Mair GR, Atkinson L, Ladurner P, Zamanian M, Novozhilova E, et al.  
1359 Discovery of multiple neuropeptide families in the phylum Platyhelminthes. *Int J*  
1360 *Parasitol*. 2009;39: 1243-52. doi: 10.1016/j.ijpara.2009.03.005.  
1361  
1362 [90] Lu Z, Sessler F, Holroyd N, Hahnel S, Quack T, Berriman M, et al. Schistosome sex  
1363 matters: a deep view into gonad-specific and pairing-dependent transcriptomes reveals  
1364 a complex gender interplay. *Scientific Reports*. 2016;6: 1–14. doi: 10.1038/srep31150  
1365

- 1366 [91] Wang J, Yu Y, Shen H, Qing T, Zheng Y, Li Q, et al. Dynamic transcriptomes identify  
1367 biogenic amines and insect-like hormonal regulation for mediating reproduction  
1368 in *Schistosoma japonicum*. Nat Commun. 2017;8: 14693. pmid:28287085  
1369
- 1370 [92] Magalhães LG, Morais ER, Machado CB, Gomes MS, Cabral FJ, Souza JM, et al.  
1371 Uncovering Notch pathway in the parasitic flatworm *Schistosoma mansoni*. Parasitol  
1372 Res. Parasitology Research; 2016;115: 3951–3961. doi: 10.1007/s00436-016-5161-8  
1373
- 1374 [93] Parker-Manuel SJ, Ivens AC, Dillon GP, Wilson RA. Gene expression patterns in larval  
1375 *Schistosoma mansoni* associated with infection of the mammalian host. PLoS Negl Trop  
1376 Dis. 2011;5: e1274–19. doi: 10.1371/journal.pntd.0001274  
1377
- 1378 [94] Wendt GR, Collins JJ III. Schistosomiasis as a disease of stem cells. Current Opinion in  
1379 Genetics & Development. 2016;40:9 5–102. doi: 10.1016/j.gde.2016.06.010  
1380
- 1381 [95] Whitfield PJ, Evans NA. Parthenogenesis and asexual multiplication among parasitic  
1382 platyhelminths. Parasitology. 1983;86:121-160. doi: 10.1017/S0031182000050873  
1383
- 1384 [96] Galaktinov KV, Dombrovskij A. The Biology and Evolution of Trematodes. 1st ed.  
1385 Springer Science and Business Media; 2013.  
1386
- 1387 [97] Grevelding CG. Genomic instability in *Schistosoma mansoni*. Molecular and Biochemical  
1388 Parasitology. 1999;101: 207-216. doi: 10.1016/S0166-6851(99)00078-X  
1389
- 1390 [98] Bayne CJ, Grevelding CG. Cloning of *Schistosoma mansoni* sporocysts in vitro and  
1391 detection of genetic heterogeneity among individuals within clones. Journal of  
1392 Parasitology. 2003;89:1056-1060. doi: 10.1645/GE-3186RN  
1393
- 1394 [99] Khalil GM, Cable RM. Germinal development in *Philophthalmus megalurus* (CORT,  
1395 1914) (Trematoda: Digenea). Z. Parasitenk. 1968;31: 211-231.  
1396
- 1397 [100] Cribb TH, Bray RA, Olson PD, Littlewood DTJ. Life cycle evolution in the digenea: a new  
1398 perspective from phylogeny. In: Littlewood DTJ, Baker JR, Muller R, Rollinson D, editors.  
1399 Advances in Parasitology: The Evolution of Parasitism- a Phylogenetic Perspective  
1400 Volume 54. Amsterdam: Elsevier Academic Press; 2003. pp. 198-254.  
1401
- 1402 [101] Zhang Z, Kostetskii I, Moss SB, Jones BH, Ho C, Wang H, et al. Haploinsufficiency for  
1403 the murine orthologue of Chlamydomonas PF20 disrupts spermatogenesis. Proc Natl  
1404 Acad Sci. 2004;101: 12946-51. doi: 10.1073/pnas.0404280101  
1405
- 1406 [102] Steiner R, Ever L, Don J. MEIG1 localizes to the nucleus and binds to meiotic  
1407 chromosomes of spermatocytes as they initiate meiosis. J. Dev. Biol. 1999;216: 635-  
1408 645. doi: 10.1006/dbio.1999.9520  
1409
- 1410 [103] Anderson L, Amaral MS, Beckedorff F, Silva LF, Dazzani B, Oliviera KC, et al.  
1411 *Schistosoma mansoni* egg, adult male and female comparative gene expression  
1412 analysis and identification of novel genes by RNA-Seq. PLoS Negl Trop Dis. 2015;9:  
1413 e0004334. doi: 10.1371/journal.pntd.0004334  
1414

- 1415 [104] Nawaratna SS, McManus DP, Moertel L, Gobert GN, Jones MK. Gene atlas of  
1416 digestive and reproductive tissues in *Schistosoma mansoni*. PLoS Negl Trop Dis.  
1417 2011;5: e1043. doi: 10.1371/journal.pntd.0001043  
1418
- 1419 [105] Cai P, Liu S, Piao X, Hou N, Gobert GN, McManus DP, Chen Q. Comprehensive  
1420 transcriptome analysis of sex-biased expressed genes reveals discrete biological and  
1421 physiological features of male and female *Schistosoma japonicum*. 2016;10: e0004684.  
1422 doi: 10.1371/journal.pntd.0004684  
1423
- 1424 [106] Iwabata K, Koshiyama A, Yamaguchi T, Sugawara H, Hamada FN, Namekawa SH, et  
1425 al. DNA topoisomerase II interacts with Lim15/Dmc1 in meiosis. Nucleic Acids Research.  
1426 2005;33: 5809–5818. doi: 10.1093/nar/gki883  
1427
- 1428 [107] Damien RT. Molecular mimicry: antigen sharing by parasite and host and its  
1429 consequences. The American Naturalist. 1964;900: 129-149.  
1430
- 1431 [108] Yoshino TP, Bayne CJ. Mimicry of snail host antigens by miracidia and primary  
1432 sporocysts of *Schistosoma mansoni*. Parasite Immunol. 1983;5: 317-328.  
1433
- 1434 [109] Yoshino, TP, Boswell, CA. Antigen sharing between larval trematodes and their snail  
1435 hosts: how real a phenomenon in immune evasion? In: Lackie, AM., editor. Immune  
1436 Mechanisms in Invertebrate Vectors. Clarendon Press; Oxford: 1986. p. 221-238.  
1437
- 1438 [110] Nyame AK, Yoshino TP, Cummings RD. Differential expression of LacdiNAc,  
1439 fucosylated LacdiNAc, and Lewis x glycan antigens in intramolluscan stages  
1440 of *Schistosoma mansoni*. J Parasitol. 2002;88: 890–897.  
1441
- 1442 [111] Lehr T, Geyer H, Maass K, Doenhoff MJ, Geyer R. Structural characterization of N-  
1443 glycans from the freshwater snail *Biomphalaria glabrata* cross-reacting with *Schistosoma*  
1444 *mansoni* glycoconjugates. Glycobiology. 2007;17: 82–103.  
1445
- 1446 [112] Lehr T, Beuerlein K, Doenhoff MJ, Grevelding CG, Geyer R. Localization of  
1447 carbohydrates common to *Biomphalaria glabrata* as well as to sporocysts and miracidia  
1448 of *Schistosoma mansoni*. Parasitology. 2008;135: 931–942.  
1449
- 1450 [113] Peterson NA, Hokke CH, Deelder AM, Yoshino TP. Glycotope analysis in miracidia and  
1451 primary sporocysts of *Schistosoma mansoni*: differential expression during the  
1452 miracidium-to-sporocyst transformation. Int J Parasitol. 2009;39: 1331–1344.  
1453
- 1454 [114] Johnston LA, Yoshino TP. Larval *Schistosoma mansoni* excretory-secretory  
1455 glycoproteins (ESPs) bind to hemocytes of *Biomphalaria glabrata* (Gastropoda) via  
1456 surface carbohydrate binding receptors. Journal of Parasitology. 2001;87: 786-793. doi:  
1457 10.1645/0022-3395(2001)087[0786:LSMESG]2.0.CO;2  
1458
- 1459 [115] Yoshino TP, Wu X-J, Liu H, Gonzalez LA, Deelder AM, Hokke CH. Glycotope sharing  
1460 between snail hemolymph and larval schistosomes: larval transformation products alter  
1461 shared glycan patterns of plasma proteins. PLoS Negl Trop Dis 2012;6: e1569. 2012.  
1462 doi: 10.1371/journal.pntd.0001569  
1463
- 1464 [116] Castillo MG, Wu X-J, Dinguirard N, Nyame AK, Cummings RD, Yoshino P. Surface  
1465 membrane proteins of *Biomphalaria glabrata* embryonic cells bind fucosyl determinants

- 1466 on the tegumental surface of *Schistosoma mansoni* primary sporocysts. The Journal of  
1467 Parasitology. 2007;93: 832-840. doi: 10.1645/GE-954R.1  
1468
- 1469 [117] Řimnáčová J, Mikeš L, Turjanicová L, Bulantová J, Horák P. Changes in surface  
1470 glycosylation and glycocalyx shedding in *Trichobilharzia regenti* (Schistosomatidae)  
1471 during the transformation of cercaria to schistosomulum. PLoS One. 2017;12: e0173217.  
1472 doi: 10.1371/journal.pone.0173217  
1473
- 1474 [118] Hahn UK, Bender RC, Bayne CJ. Killing of *Schistosoma mansoni* sporocysts by  
1475 hemocytes from resistant *Biomphalaria glabrata*: Role of reactive oxygen species.  
1476 Journal of Parasitology. 2001;87: 292-299. doi: 10.1645/0022-  
1477 3395(2001)087[0292:KOSMSB]2.0.CO;2  
1478
- 1479 [119] Mkoji GM, Smith JM, Prichard RK. Antioxidant systems in *Schistosoma mansoni*:  
1480 correlation between susceptibility to oxidant killing and the levels of scavengers of  
1481 hydrogen peroxide and oxygen free radicals. Int J Parasitol. 1988;18: 661-666. doi:  
1482 10.1016/0020-7519(88)90101-4  
1483
- 1484 [120] Sayed AA, Cook SK, Williams DL. Redox balance mechanisms in *Schistosoma mansoni*  
1485 rely on peroxiredoxins and albumin and implicate peroxiredoxins as novel drug targets. J  
1486 Biol Chem. 2006;281: 17001-17010. doi: 10.1074/jbc.M512601200  
1487
- 1488 [121] Mei H, LoVerde PT. *Schistosoma mansoni*: The developmental regulation and  
1489 immunolocalization of antioxidant enzymes. Experimental Parasitology. 1997;86: 69-78.  
1490 doi: 10.1006/expr.1997.4150  
1491
- 1492 [122] Kwatia MA, Botkin D J, Williams DL. Molecular and enzymatic characterization of  
1493 *Schistosoma mansoni* thioredoxin peroxidase. Journal of Parasitology. 2000;86: 908–  
1494 915. doi: 10.1645/0022-3395(2000)086[0908:MAECOS]2.0.CO;2  
1495
- 1496 [123] Lu J, Holmgren A. The thioredoxin antioxidant system. Free Radical Biology and  
1497 Medicine. 2014;66: 75-87. doi: 10.1016/j.freeradbiomed.2013.07.036  
1498
- 1499 [124] Ziniel PD, Karumudi B, Barnard AH, Fisher EMS, Thatcher GRJ, Podust LM, et al. The  
1500 *Schistosoma mansoni* cytochrome P450 (CYP3050A1) is essential for worm survival  
1501 and egg development. PLoS Negl Trop Dis. 2015;9: e0004279–21. doi:  
1502 10.1371/journal.pntd.0004279  
1503
- 1504 [125] Sun Y, MacRae TH. Small heat shock proteins: molecular structure and chaperone  
1505 function. Cell Mol Life Sci. 2005;62: 2460-2476. doi: 10.1007/s00018-005-5190-4  
1506
- 1507 [126] Mathieson W, Wilson RA. A comparative proteomic study of the undeveloped and  
1508 developed *Schistosoma mansoni* egg and its contents: The miracidium, hatch fluid and  
1509 secretions. International Journal for Parasitology. 2010;40: 617–628. doi:  
1510 10.1016/j.ijpara.2009.10.014  
1511
- 1512 [127] Hernandez HJ, Stadecker MJ. Elucidation and role of critical residues of  
1513 immunodominant peptide associated with T cell-mediated parasitic disease. The Journal  
1514 of Immunology. 1999;163: 3877–3882.  
1515



- 1516 [128] Ishida K, Jolly ER. Hsp70 may be a molecular regulator of schistosome host invasion.  
1517 PLoS Negl Trop Dis. 2016;10:e0004896. doi: 10.1371/journal.pntd.0004986  
1518
- 1519 [129] Lim H-K, Heyneman D. Intramolluscan inter-trematode antagonism: a review of factors  
1520 influencing the host-parasite system and its possible role in biological control. *Advances*  
1521 *in Parasitology*. 1972;10: 191-268.  
1522
- 1523 [130] Morita M. Phagocytic response of planarian reticular cells to heat-killed bacteria.  
1524 *Hydrobiologia*. 1991;227: 193-199. doi: 10.1007/BF00027602  
1525
- 1526 [131] Abnave P, Mottola G, Gimenez G, Boucherit N, Trouplin V, Torre C, et al. Screening in  
1527 planarians identifies MORN2 as a key component in LC3-associated phagocytosis and  
1528 resistance to bacterial infection. *Cell Host and Microbe*2014;16: 338–350. doi:  
1529 10.1016/j.chom.2014.08.002  
1530
- 1531 [132] Guillou F, Mitta G, Galinier R. Identification and expression of gene transcripts  
1532 generated during an anti-parasitic response in *Biomphalaria glabrata*. *Dev Comp*  
1533 *Immunol*. 2007; 31:657–671. doi: 10.1016/j.dci.2006.10.001  
1534
- 1535 [133] Laidemitt MR, Zawadzki ET, Brant SV, Mutuku MW, Mkoji GM, Loker ES. Loads of  
1536 trematodes: discovering hidden diversity of paramphistomoids in Kenyan ruminants.  
1537 *Parasitology*. 2017;144: 131-147. doi: 10.1017/S0031182016001827  
1538
- 1539 [134] Southgate VR, Brown DS, Warlow A, Knowles RJ, Jones A. The influence of  
1540 *Calicophoron microbothrium* on the susceptibility of *Bulinus tropicus* to *Schistosoma*  
1541 *bovis*. *Parasitology Research*. 1989;75: 381–391.  
1542
- 1543 [135] Stehling O, Lill R. The role of mitochondria in cellular iron-sulfur protein biogenesis:  
1544 Mechanisms, connected processes, and diseases. *Cold Spring Harbor Perspectives in*  
1545 *Biology*. 2013;5: a011312. doi: 10.1101/cshperspect.a011312  
1546
- 1547 [136] Glanfield A, McManus DP, Anderson GJ, Jones MK. Pumping iron: a potential target for  
1548 novel therapeutics against schistosomes. *Trends in Parasitology*. 2007;23: 583-588. doi:  
1549 10.1016/j.pt.2007.08.018  
1550
- 1551 [137] McManus DP. Prospects for developing of a transmission blocking vaccine against  
1552 *Schistosoma japonicum*. *Parasite Immunol*. 2005;27: 297-308. doi: 10.1111/j.1365-  
1553 3024.2005.00784.x  
1554
- 1555 [138] Yamaguchi A, Hori O, Stern DM, Hartmann E, Ogawa S, Tohyama M. Stress-associated  
1556 endoplasmic reticulum protein 1 (Serp1)/ribosome-associated membrane protein  
1557 (Ramp4) stabilizes membrane proteins during stress and facilitates subsequent  
1558 glycosylation. *Journal of Cell Biology*. 1999;217: 1195. doi: 10.1083/jcb.147.6.1195  
1559
- 1560 [139] Cheng G-F, Lin J-J, Feng X-G, Fu Z-Q, Jin Y-M, Yuan C-X, et al. Proteomic analysis of  
1561 differentially expressed proteins between the male and female worm of *Schistosoma*  
1562 *japonicum* after pairing. *Proteomics*. 2005;5: 511-521. doi: 10.1002/pmic.200400953  
1563 [140] Ram D, Lantner F, Ziv E, Lardans V, Schechter I. Cloning of the SmSPO-1 gene  
1564 preferentially expressed in sporocyst during the life cycle of the parasitic helminth  
1565 *Schistosoma mansoni*. *Biochim Biophys Acta*. 1999;30: 412-416. doi: 10.1016/S0925-  
1566 4439(99)00012-5

- 1567  
1568 [141] Holmfeldt P, Brännström K, Sellin ME, Segerman B, Carlsson SR, Gullberg M.  
1569 The *Schistosoma mansoni* protein Sm16/SmSLP/SmSPO-1 is a membrane-binding  
1570 protein that lacks the proposed microtubule-regulatory activity. *Molecular and*  
1571 *Biochemical Parasitology*. 2007;156: 225-234. doi: 10.1016/j.molbiopara.2007.08.006  
1572  
1573 [142] Wilson RA. The cell biology of schistosomes: a window on the evolution of the early  
1574 metazoa. *Protoplasma*. 2012;249: 503-518: doi: 10.1007/s00709-011-0326-x  
1575  
1576 [143] El-Shehabi F, Vermiere JJ, Yoshino TP, Ribeiro P. Developmental expression analysis  
1577 and immunolocalization of a biogenic amine receptor in *Schistosoma mansoni*.  
1578 *Experimental Parasitology*. 2009;122: 17-27. doi: 10.1016/j.exppara.2009.01.001  
1579  
1580 [144] Manger P, Li J, Christensen BM, Yoshino TP. Biogenic monoamines in the freshwater  
1581 snail, *Biomphalaria glabrata*: influence of infection by the human blood fluke,  
1582 *Schistosoma mansoni*. *Comparative Biochemistry and Physiology Part A: Physiology*.  
1583 1996;114: 227–234. doi:10.1016/0300-9629(95)02131-0  
1584  
1585 [145] de Jong-Brink M, ter Maat A, Tensen CP. NPY in invertebrates: molecular answers to  
1586 altered functions during evolution. *Peptides*. 2001;22: 309–315. doi: 10.1016/S0196-  
1587 9781(01)00332-1

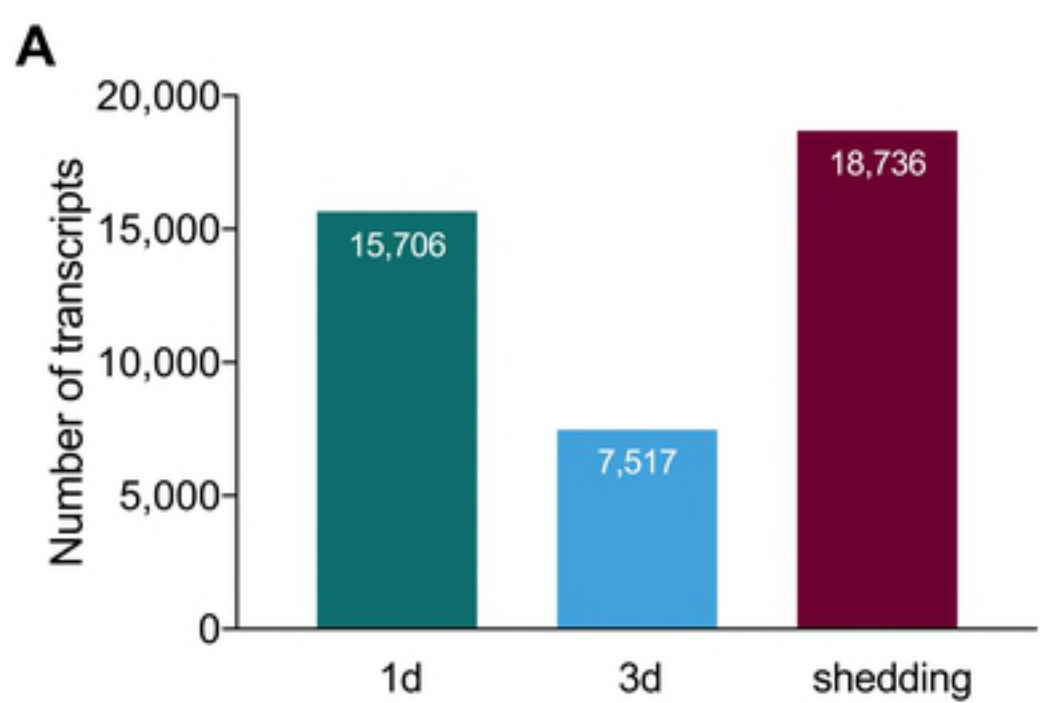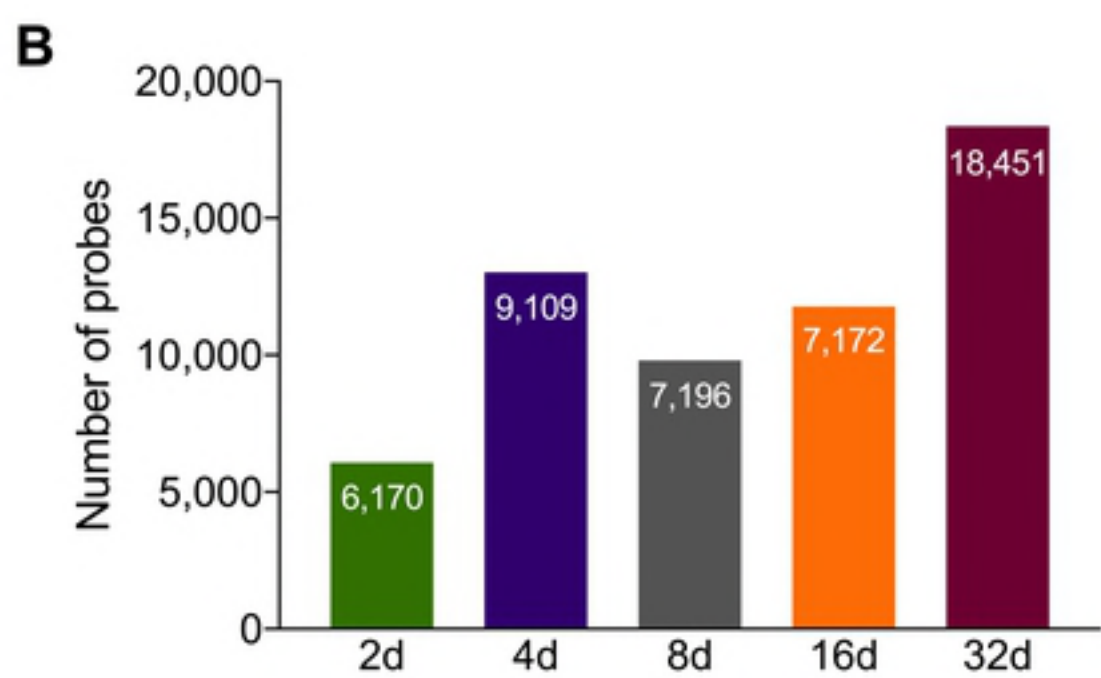

Fig 1

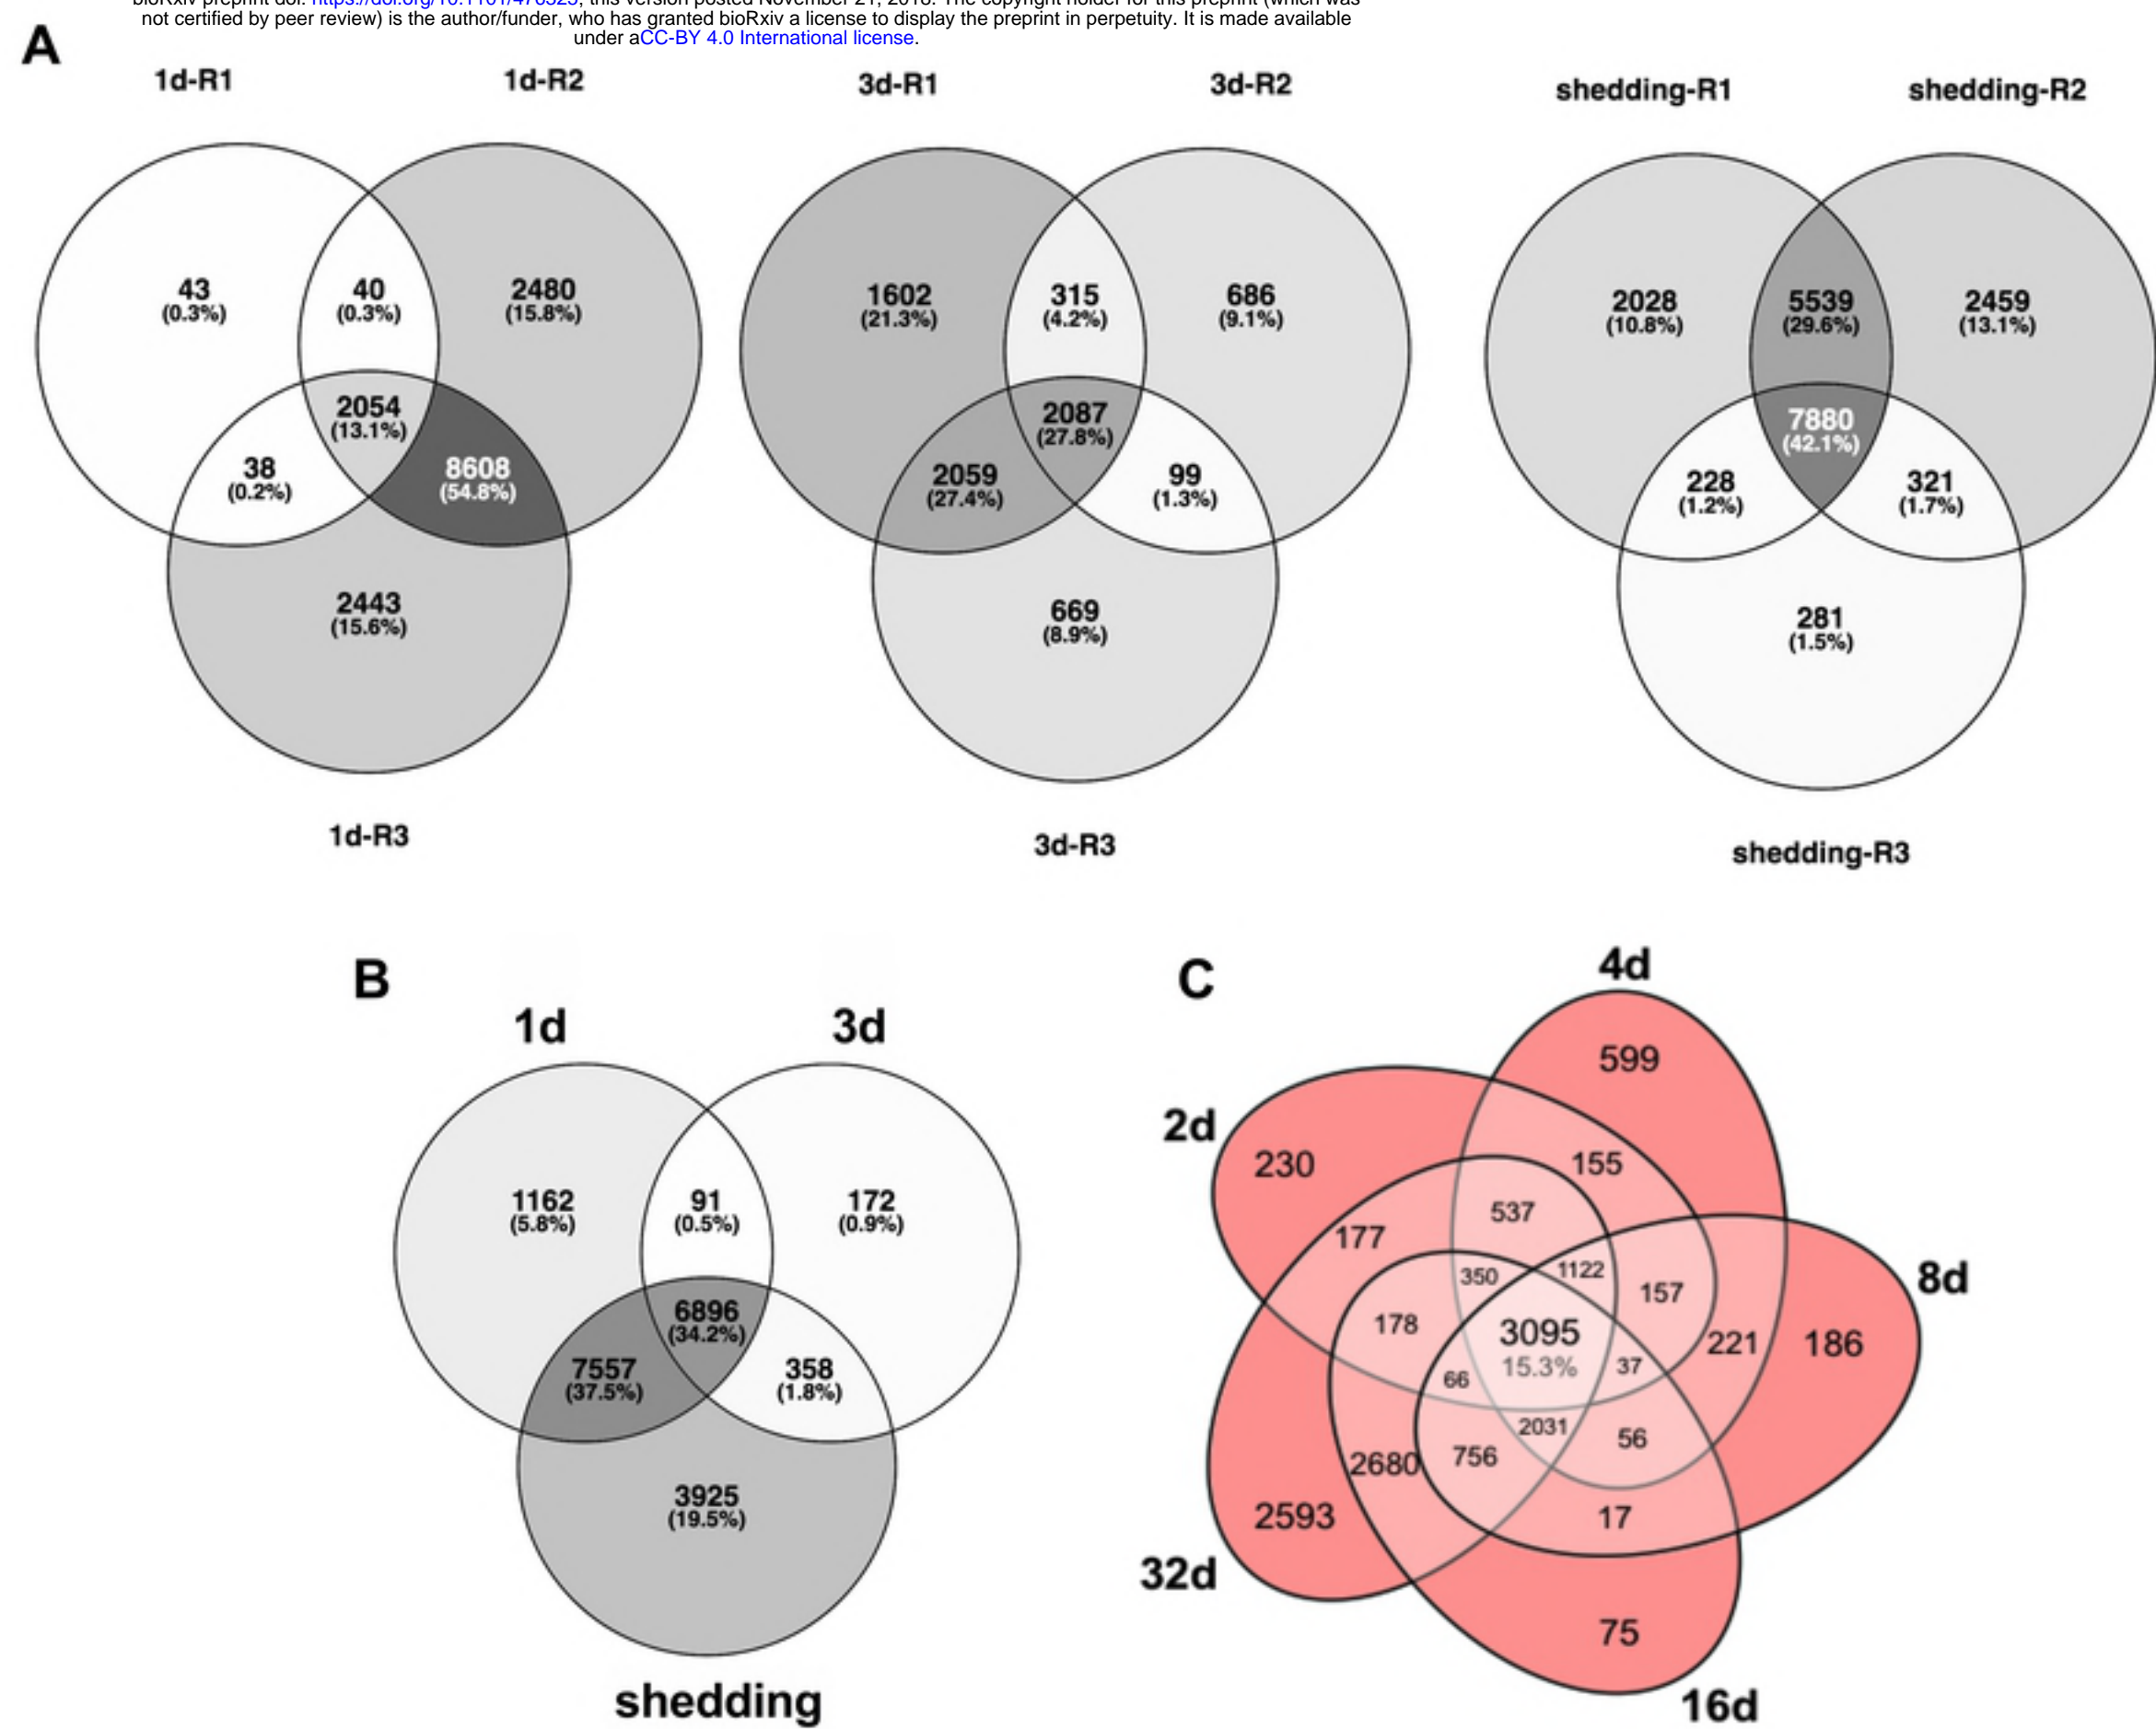

Fig 2

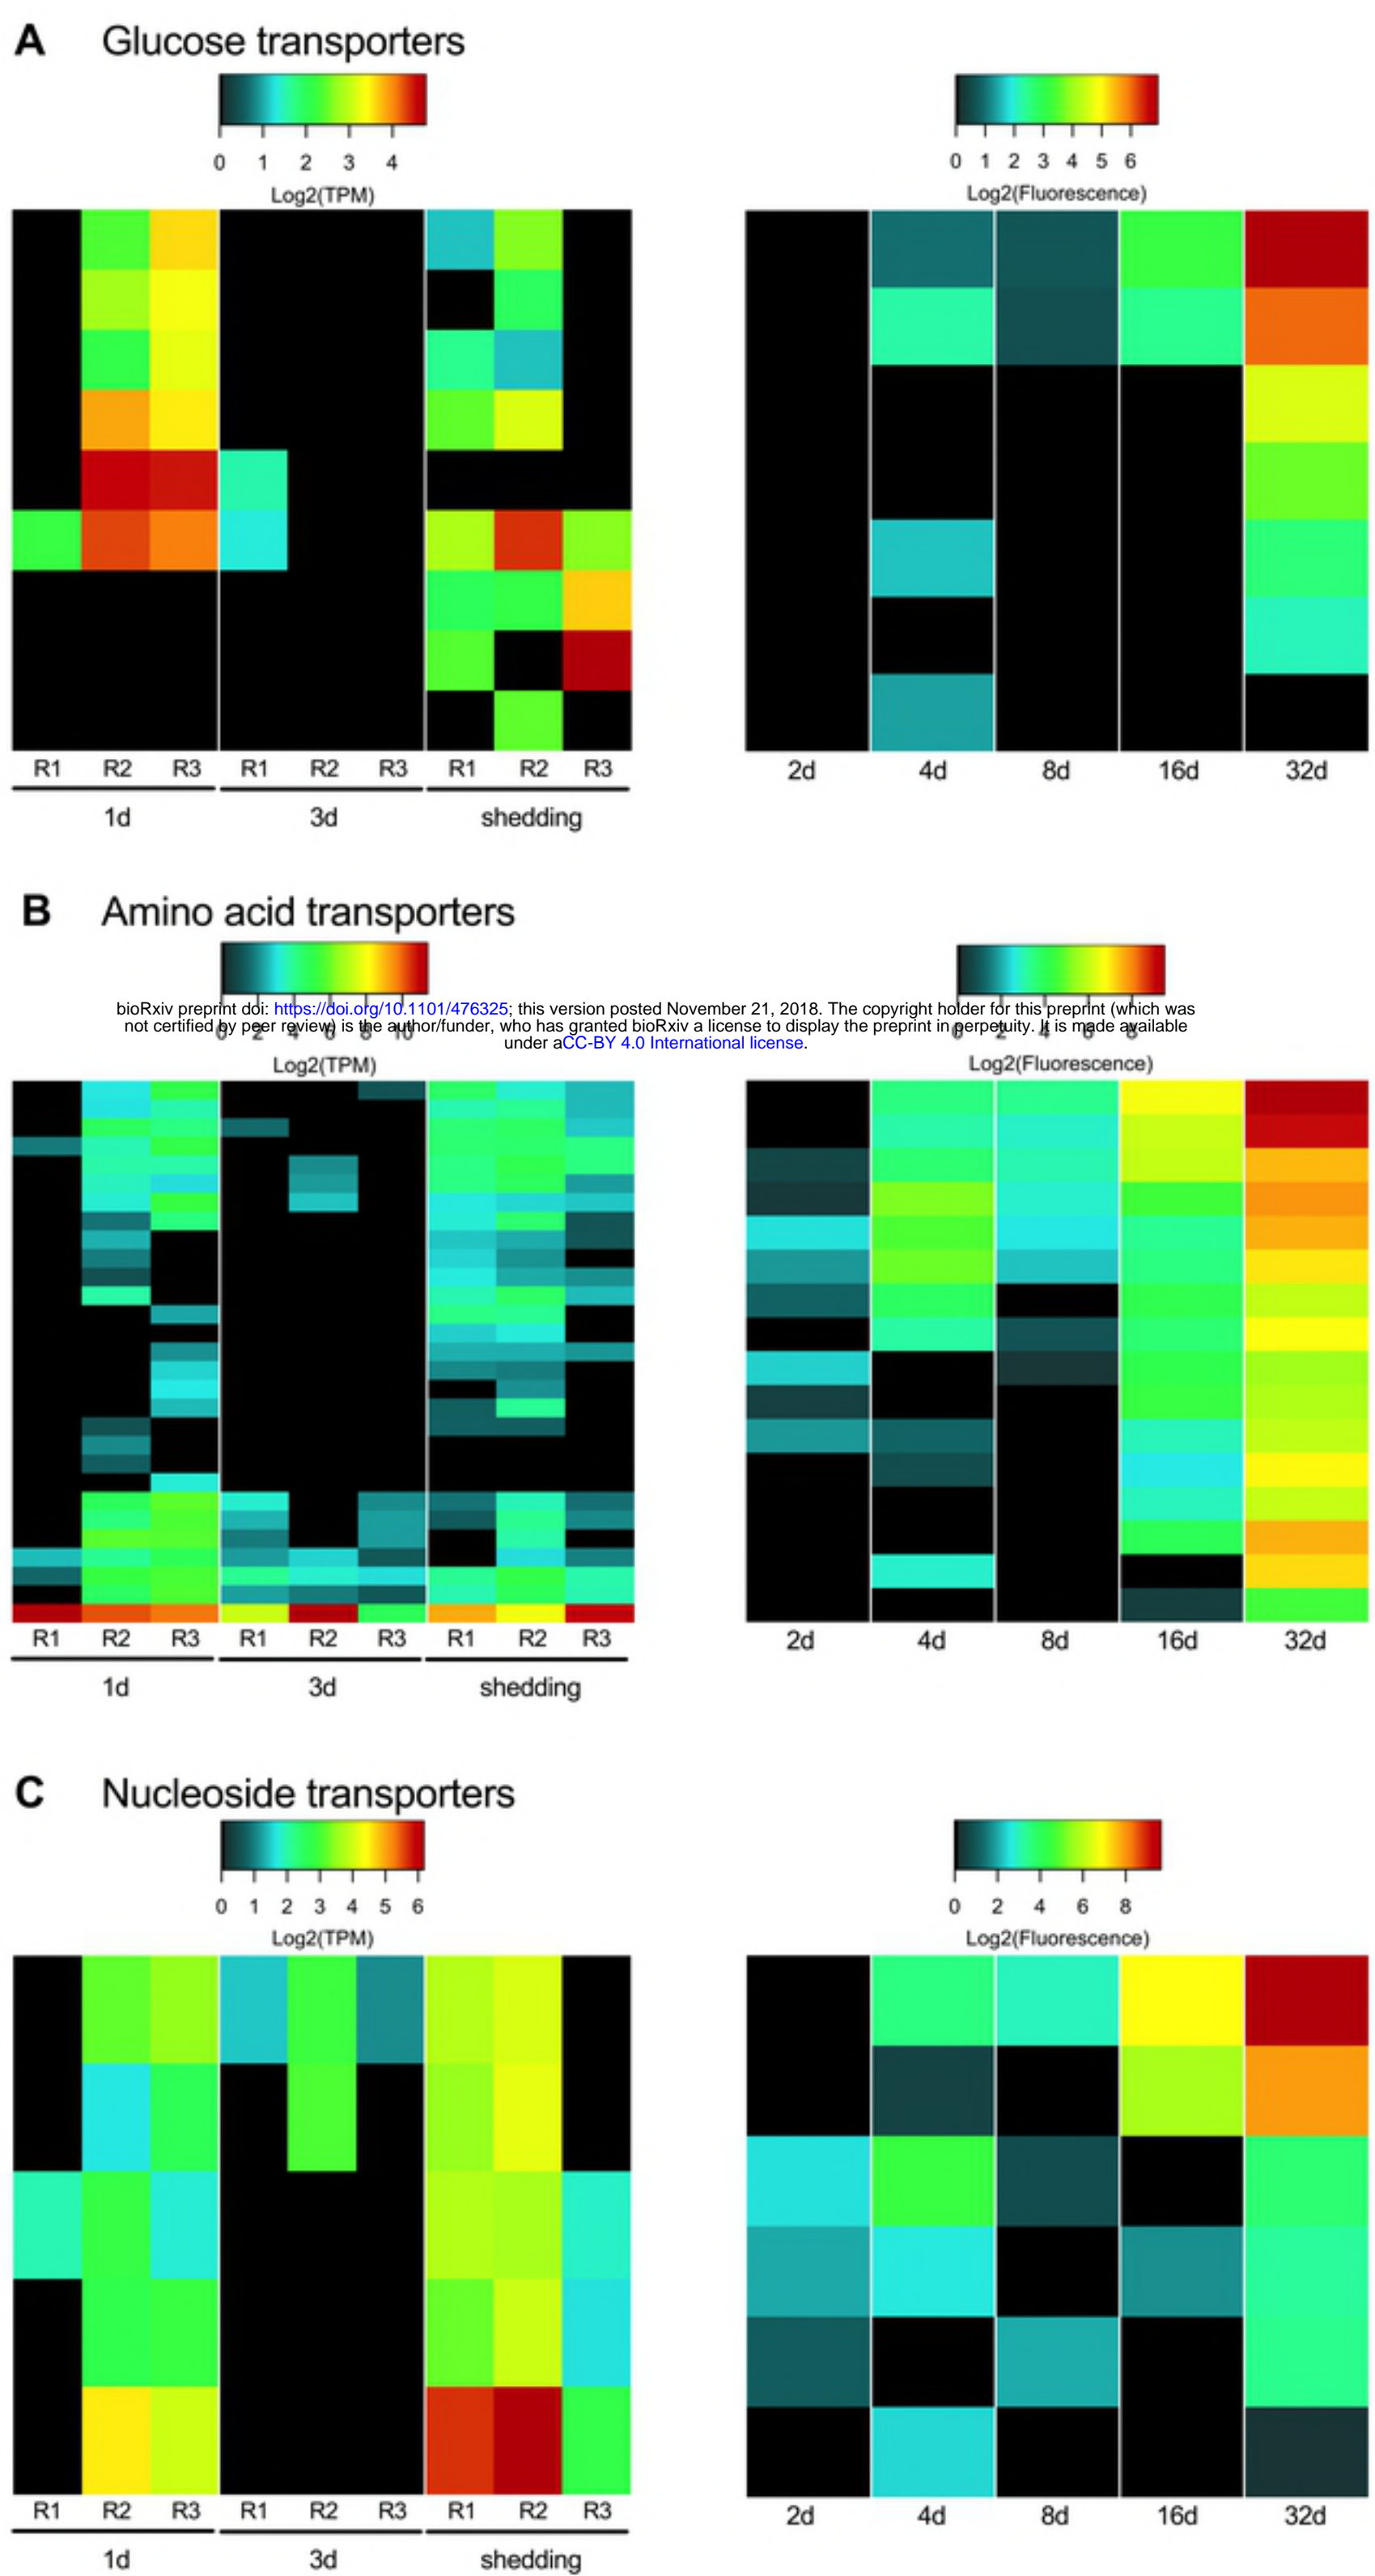

Fig 3

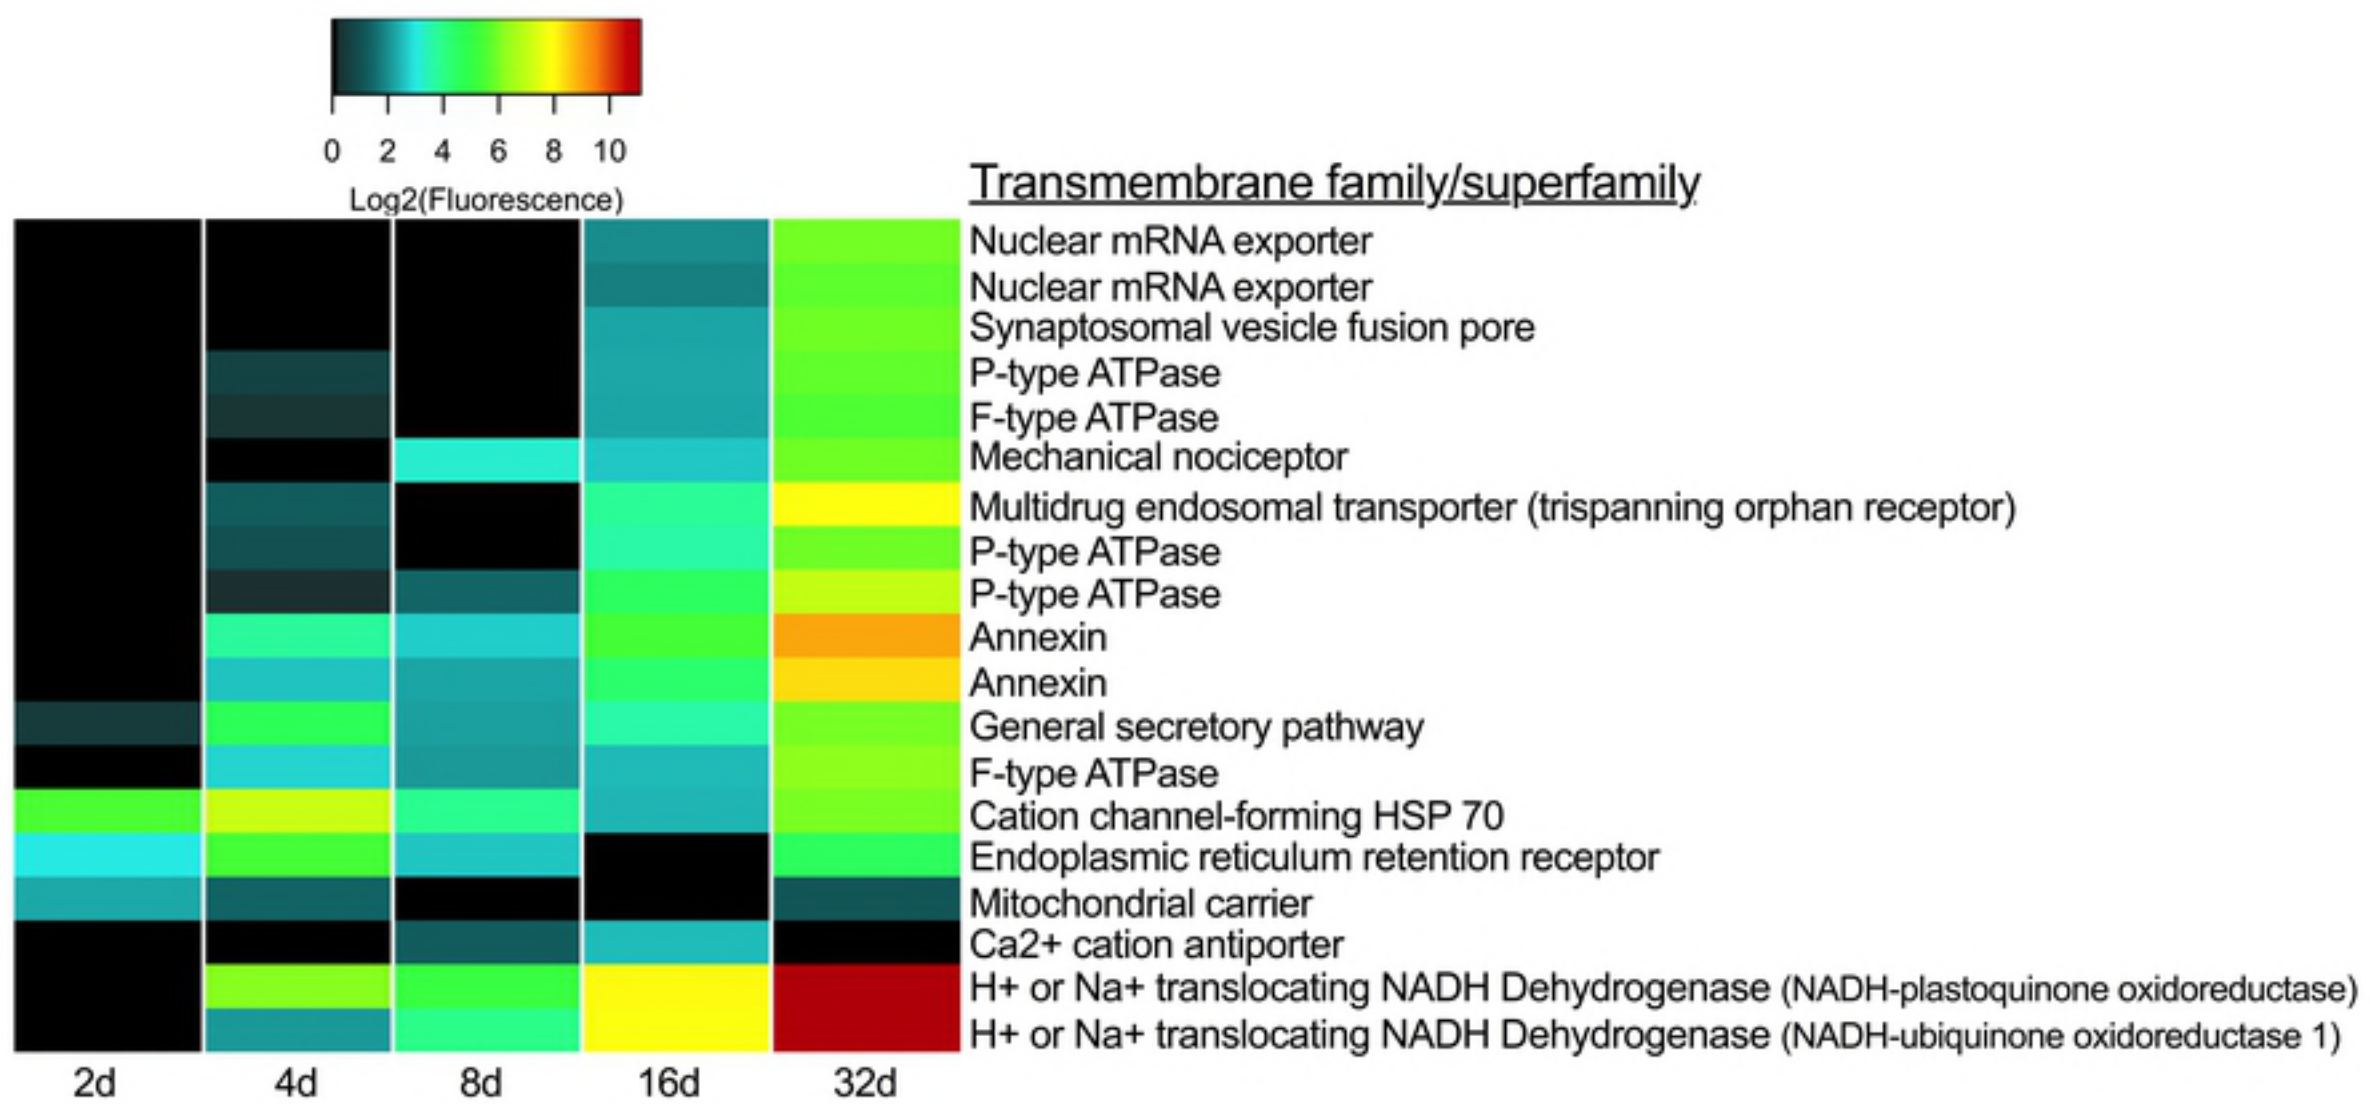

Fig 4

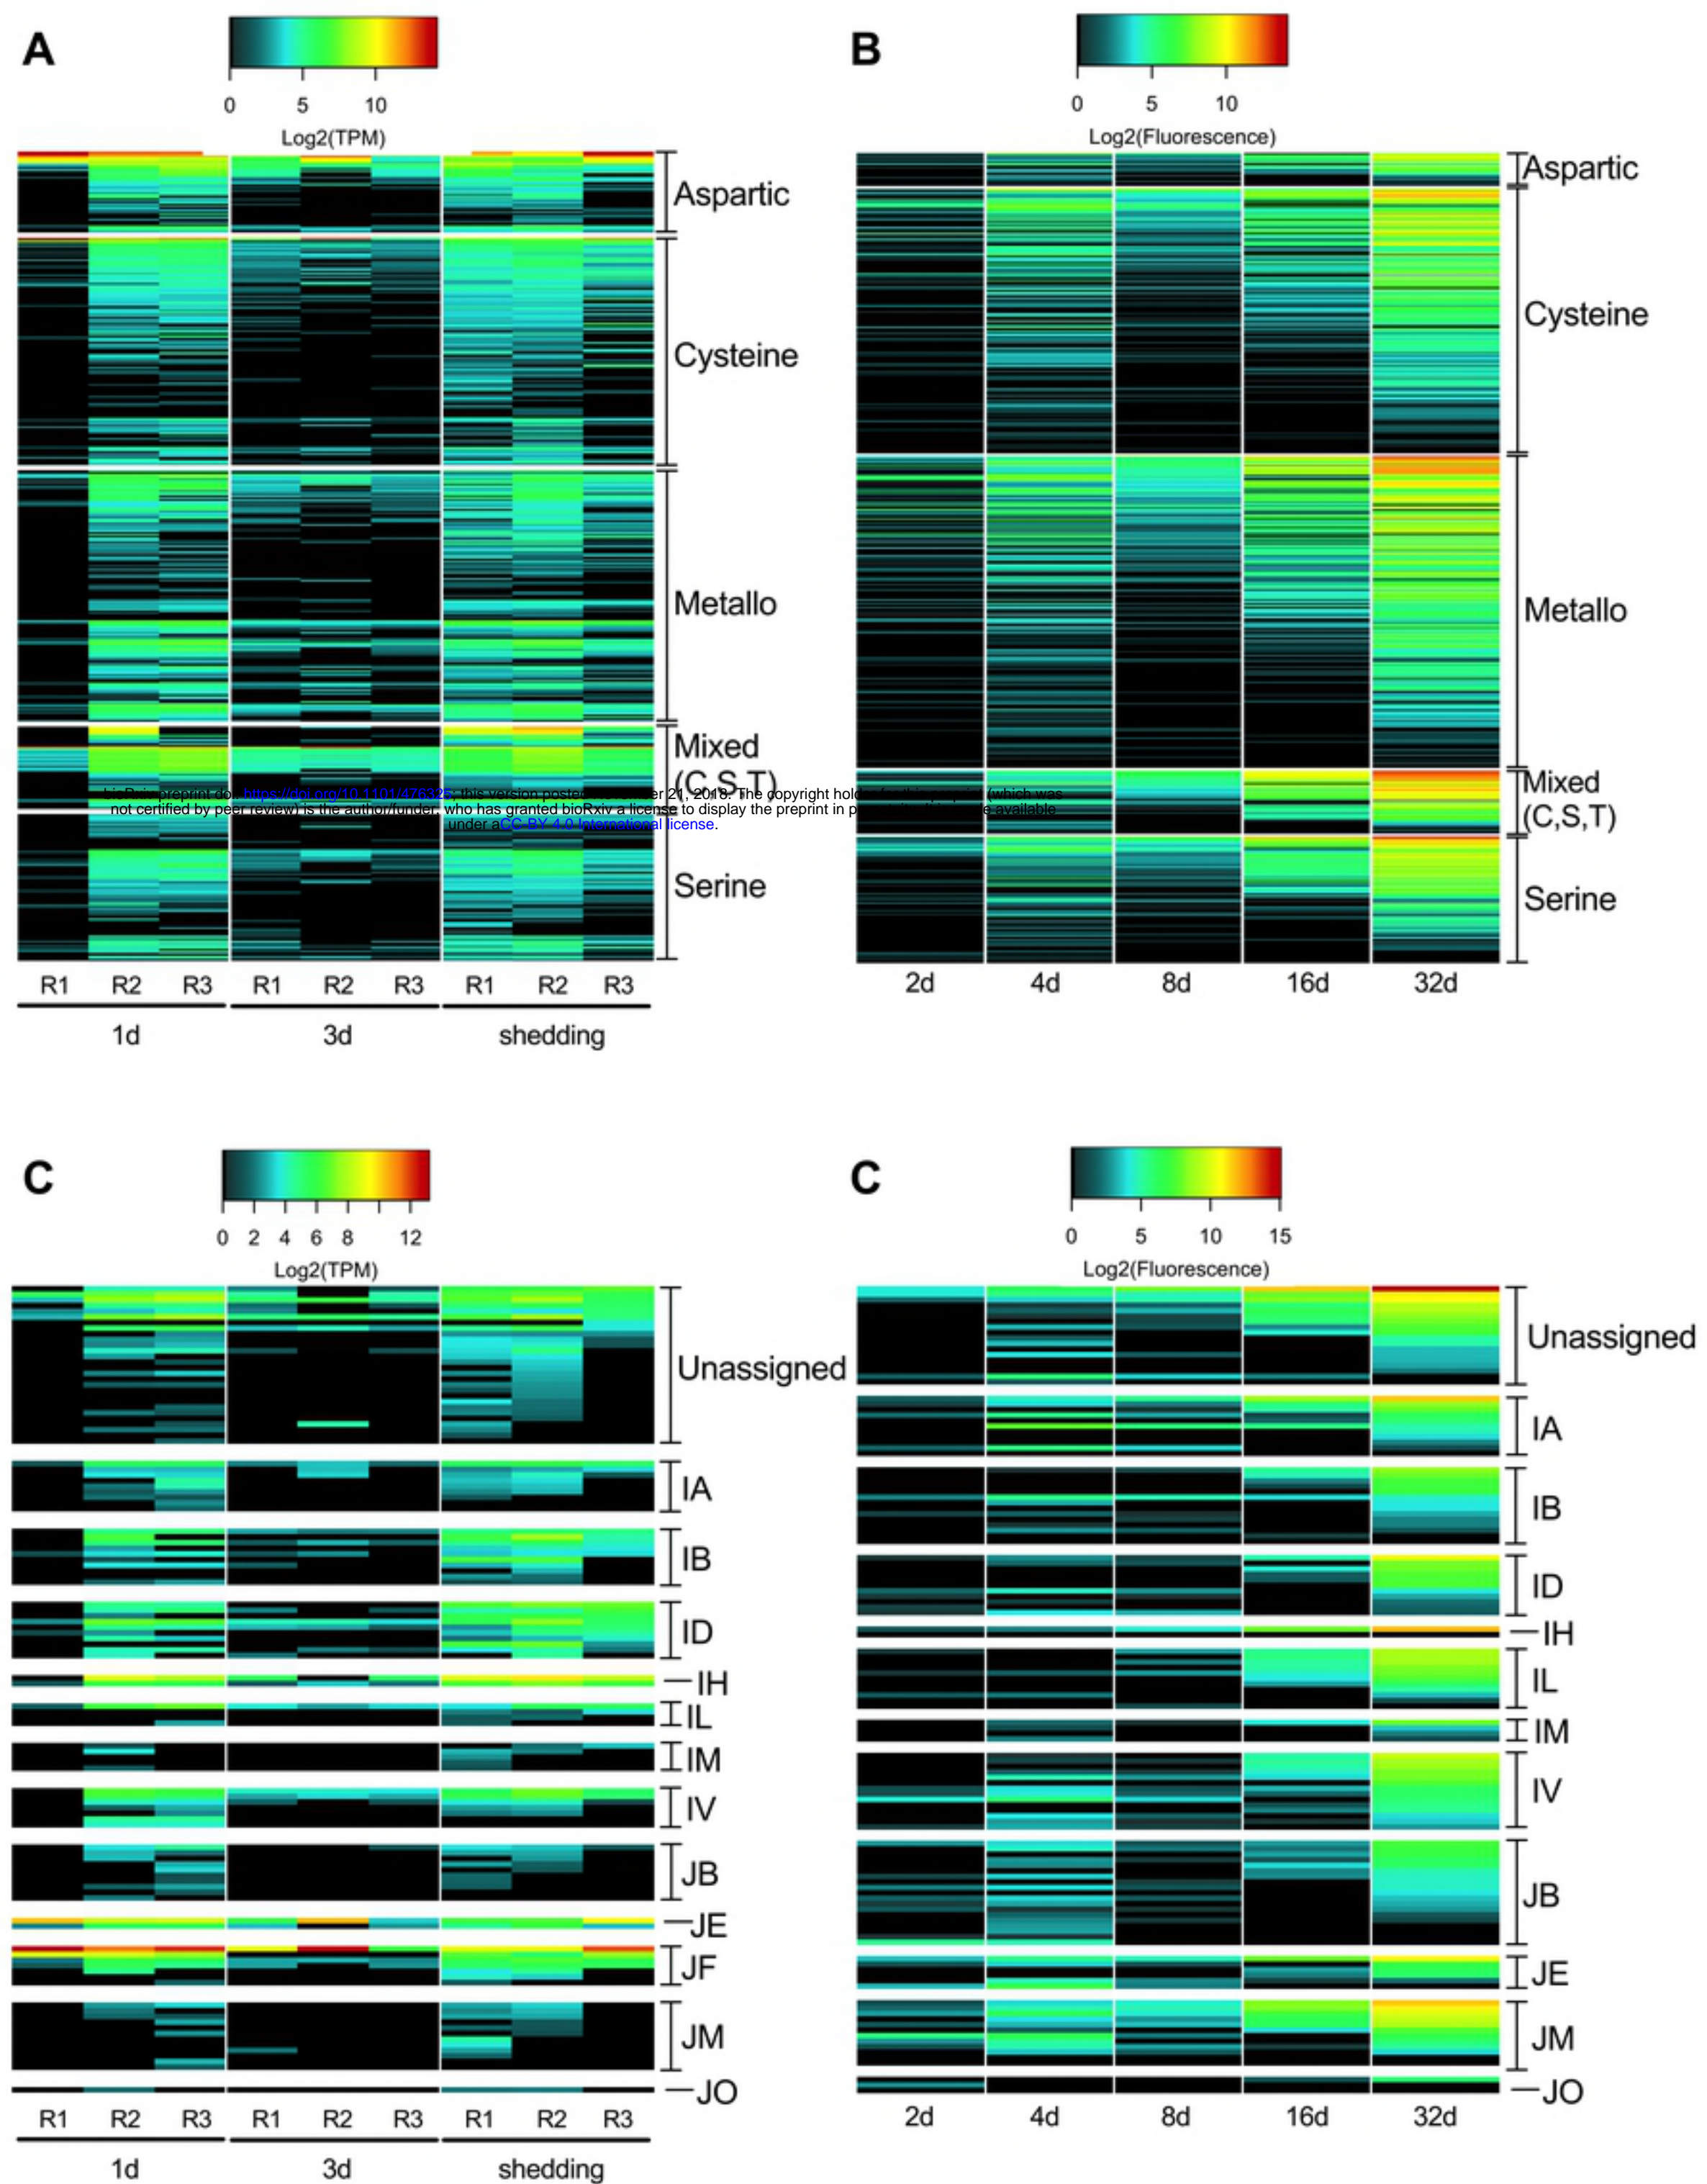

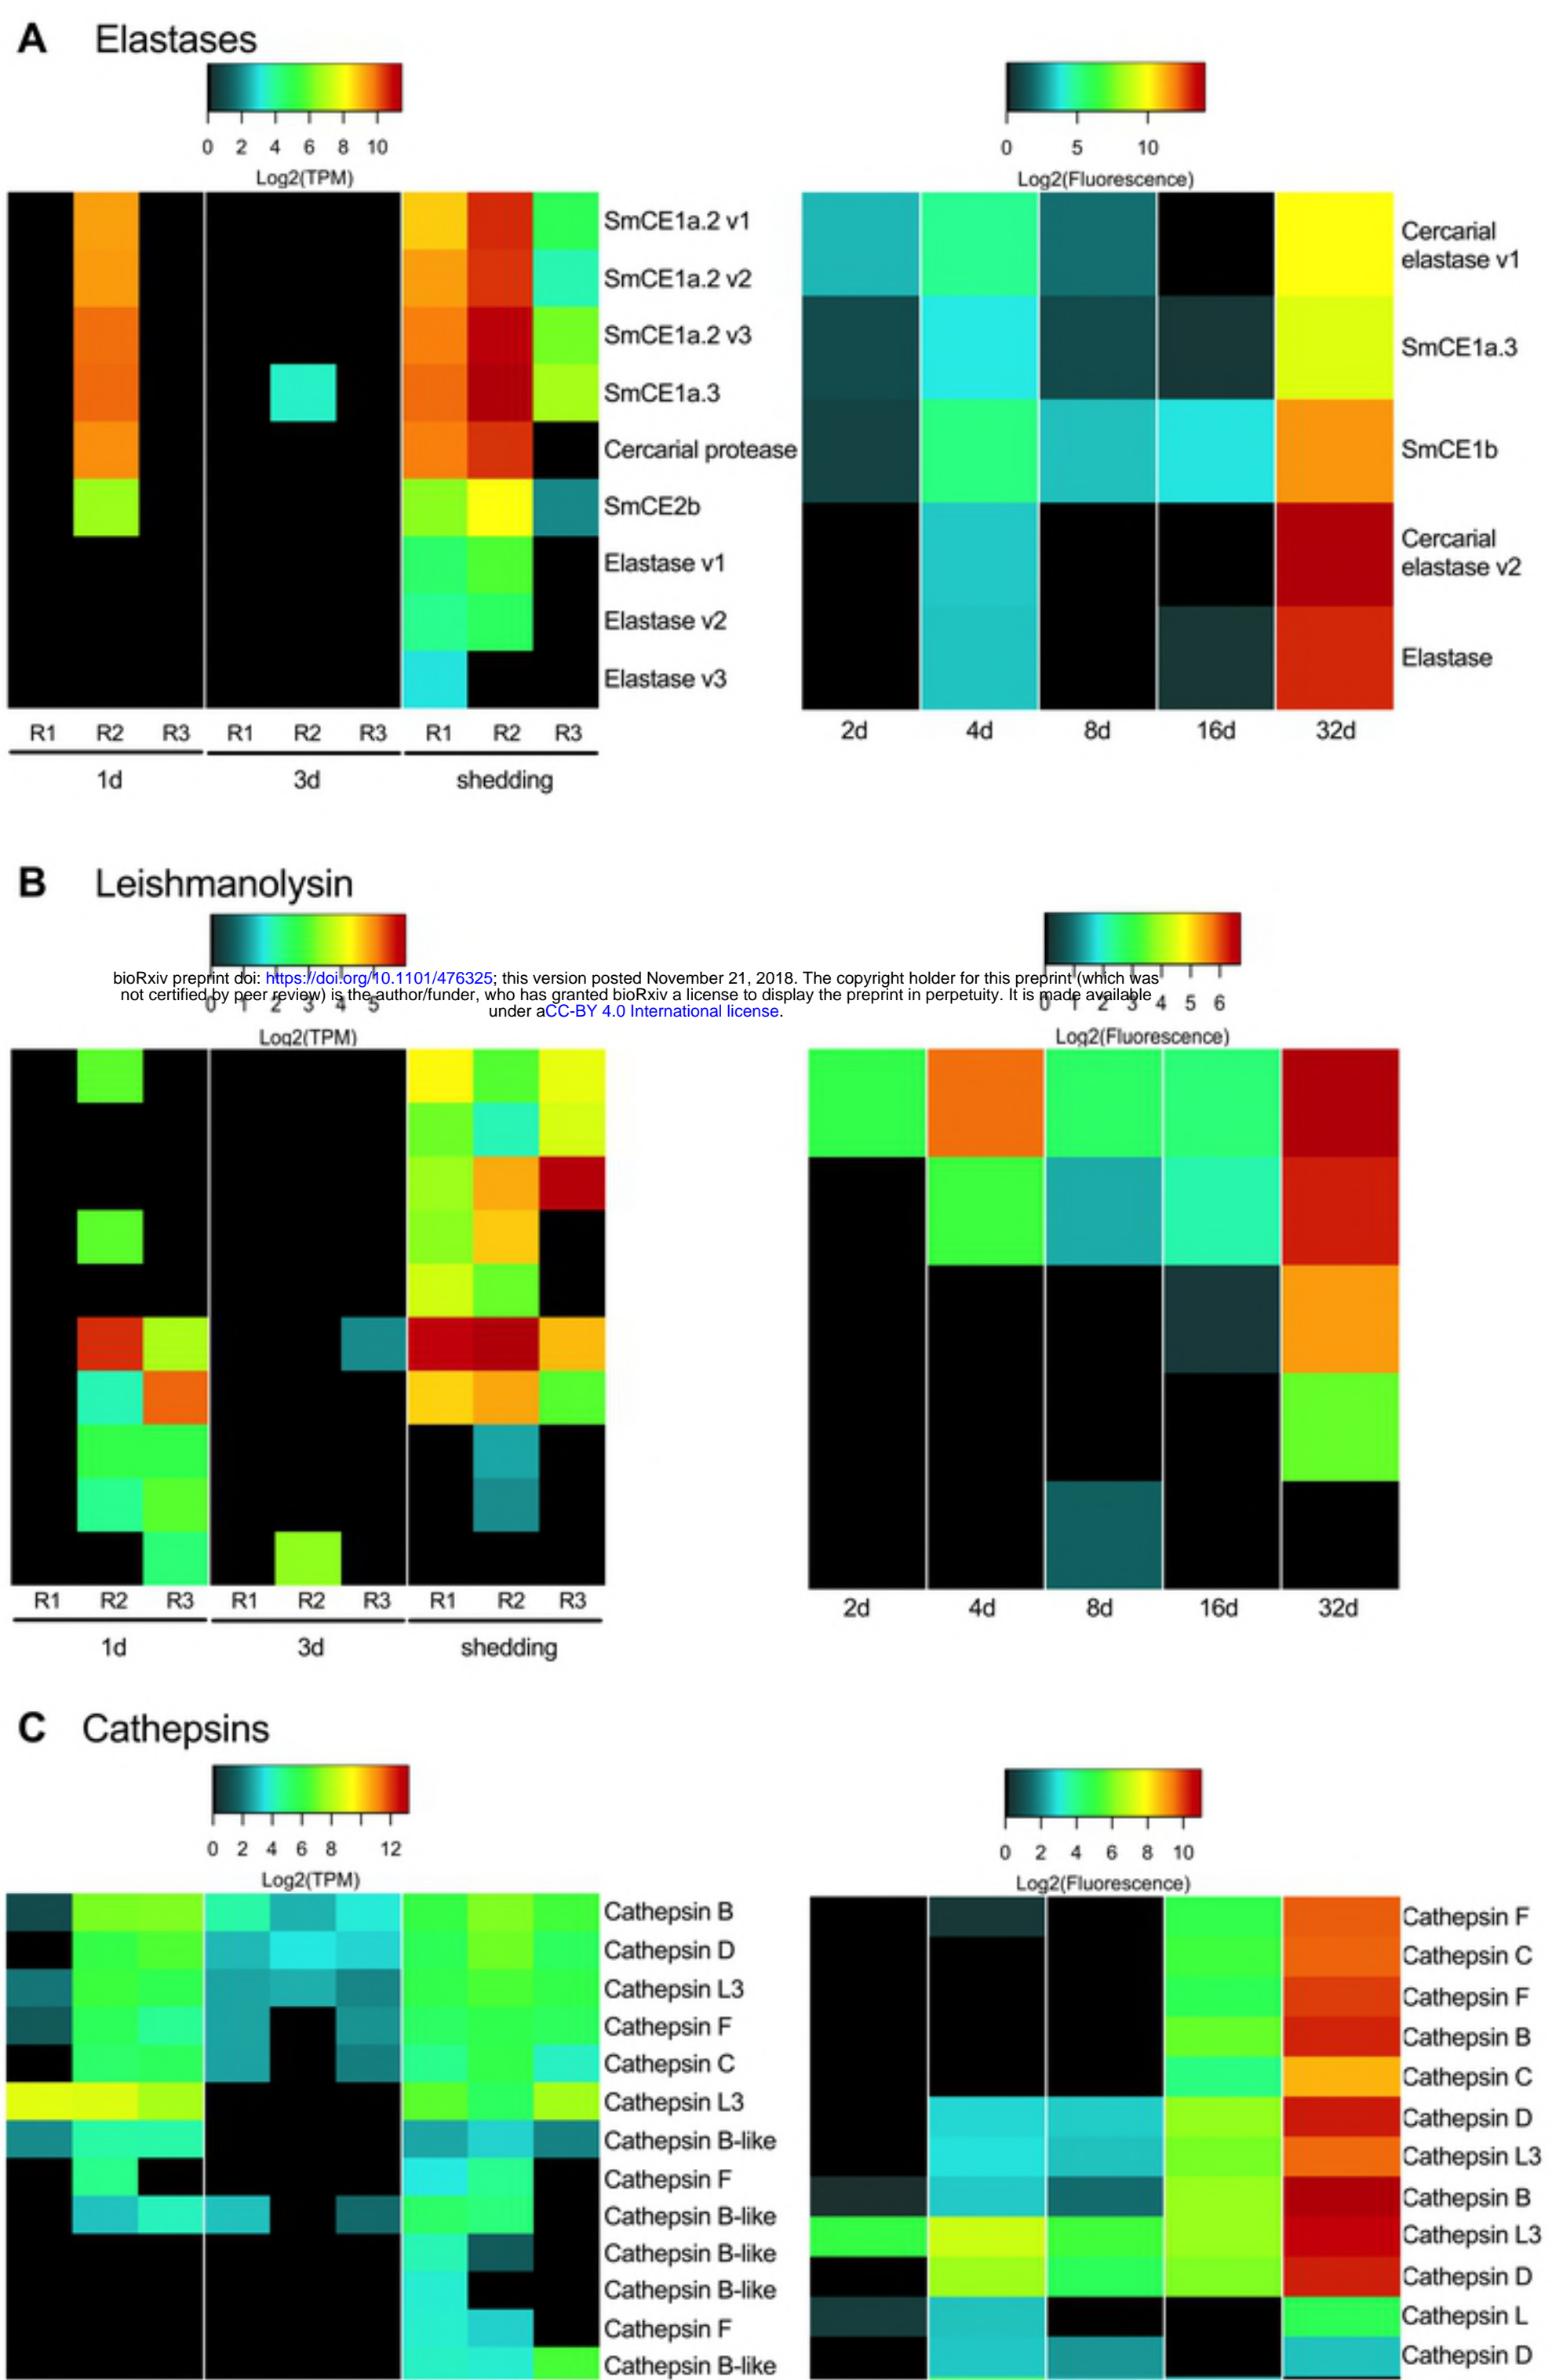

Fig 6



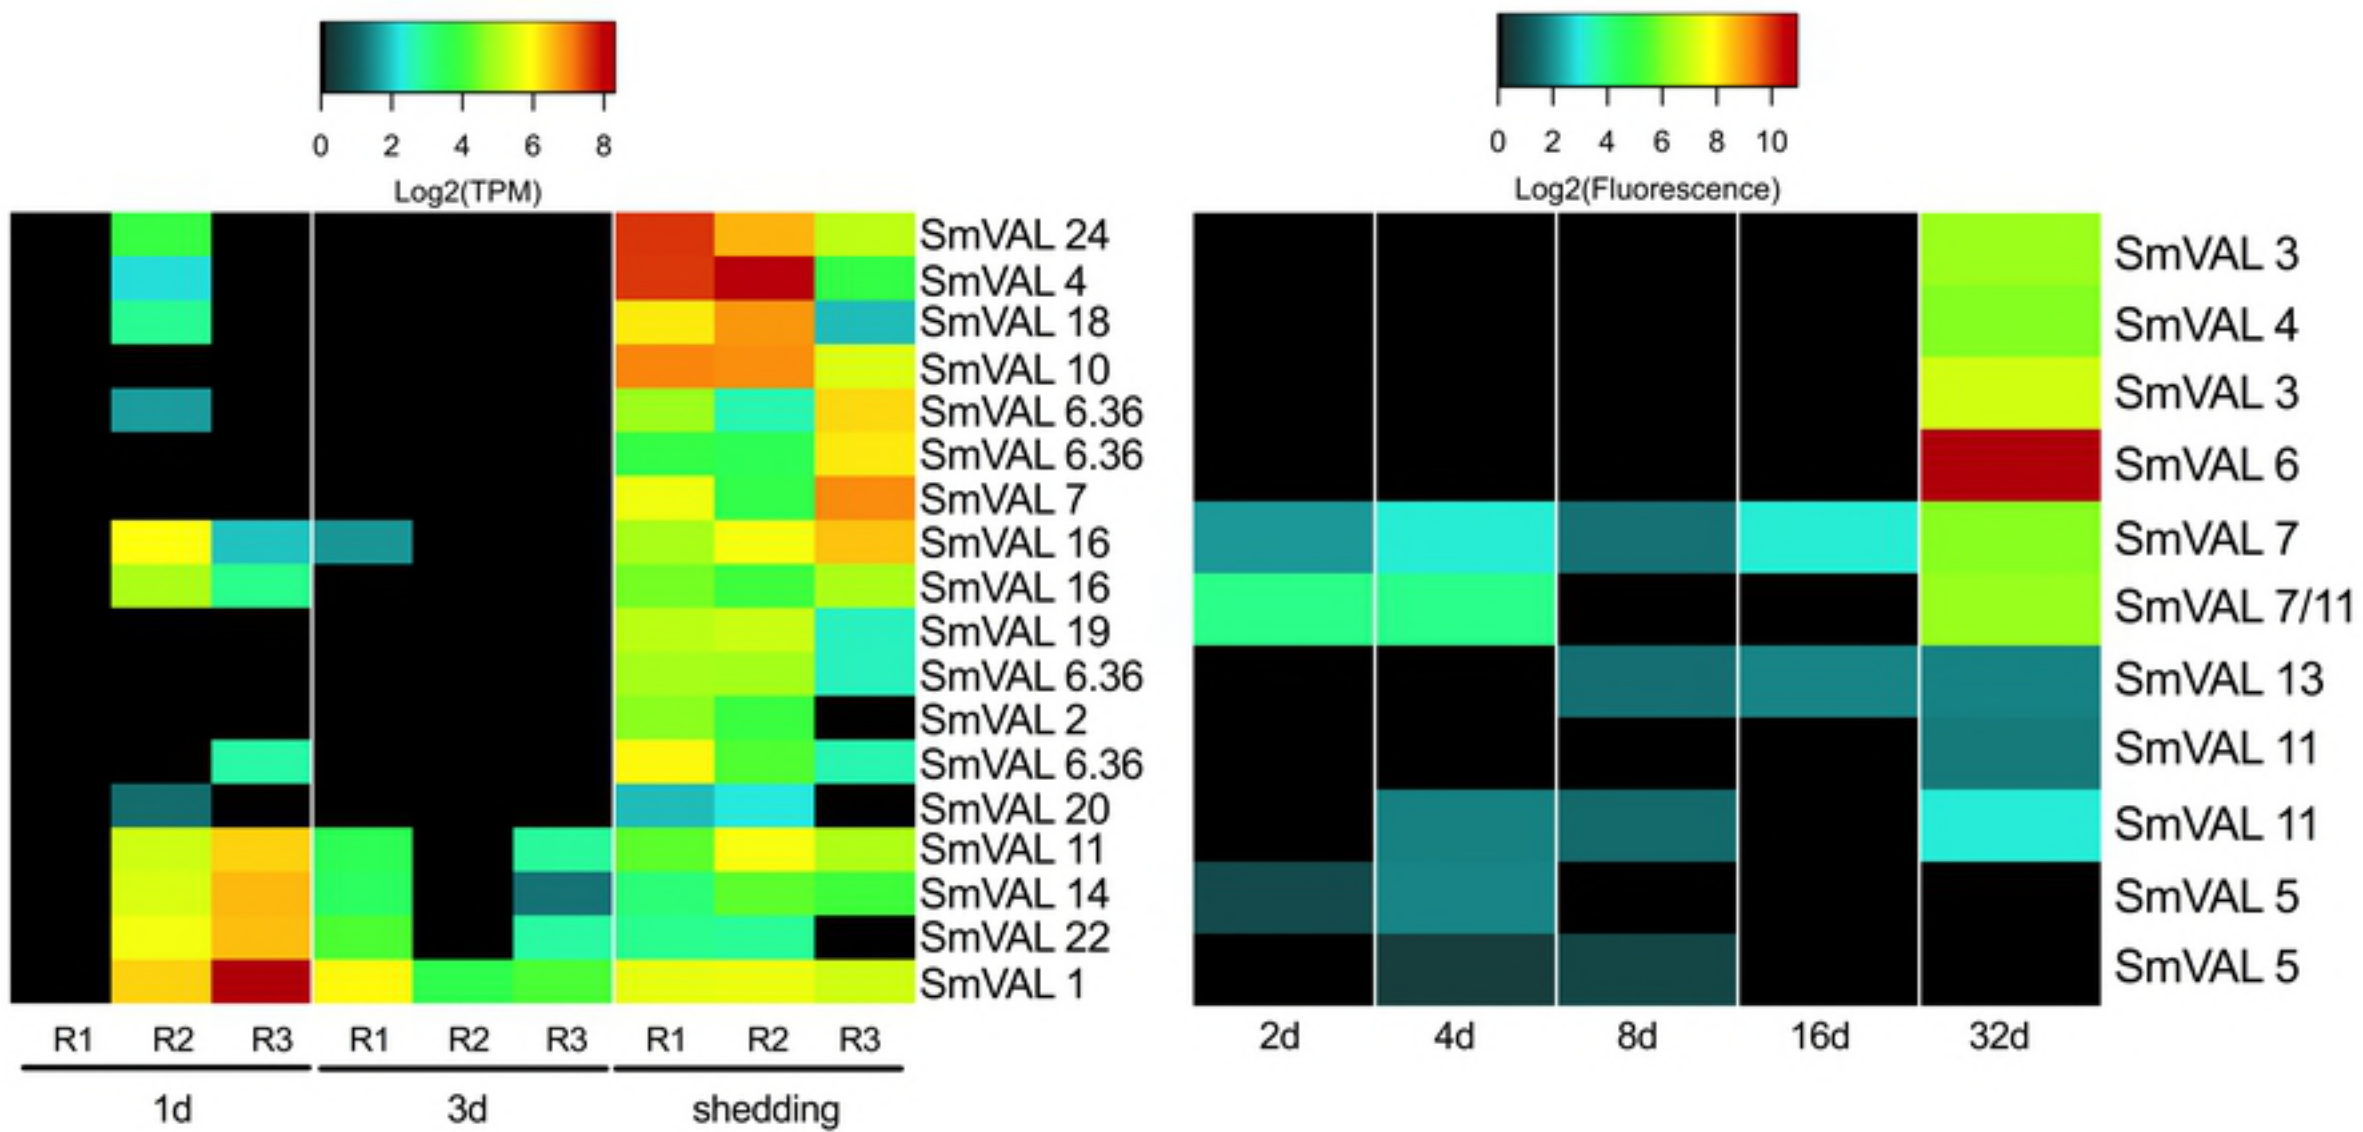

Fig 7

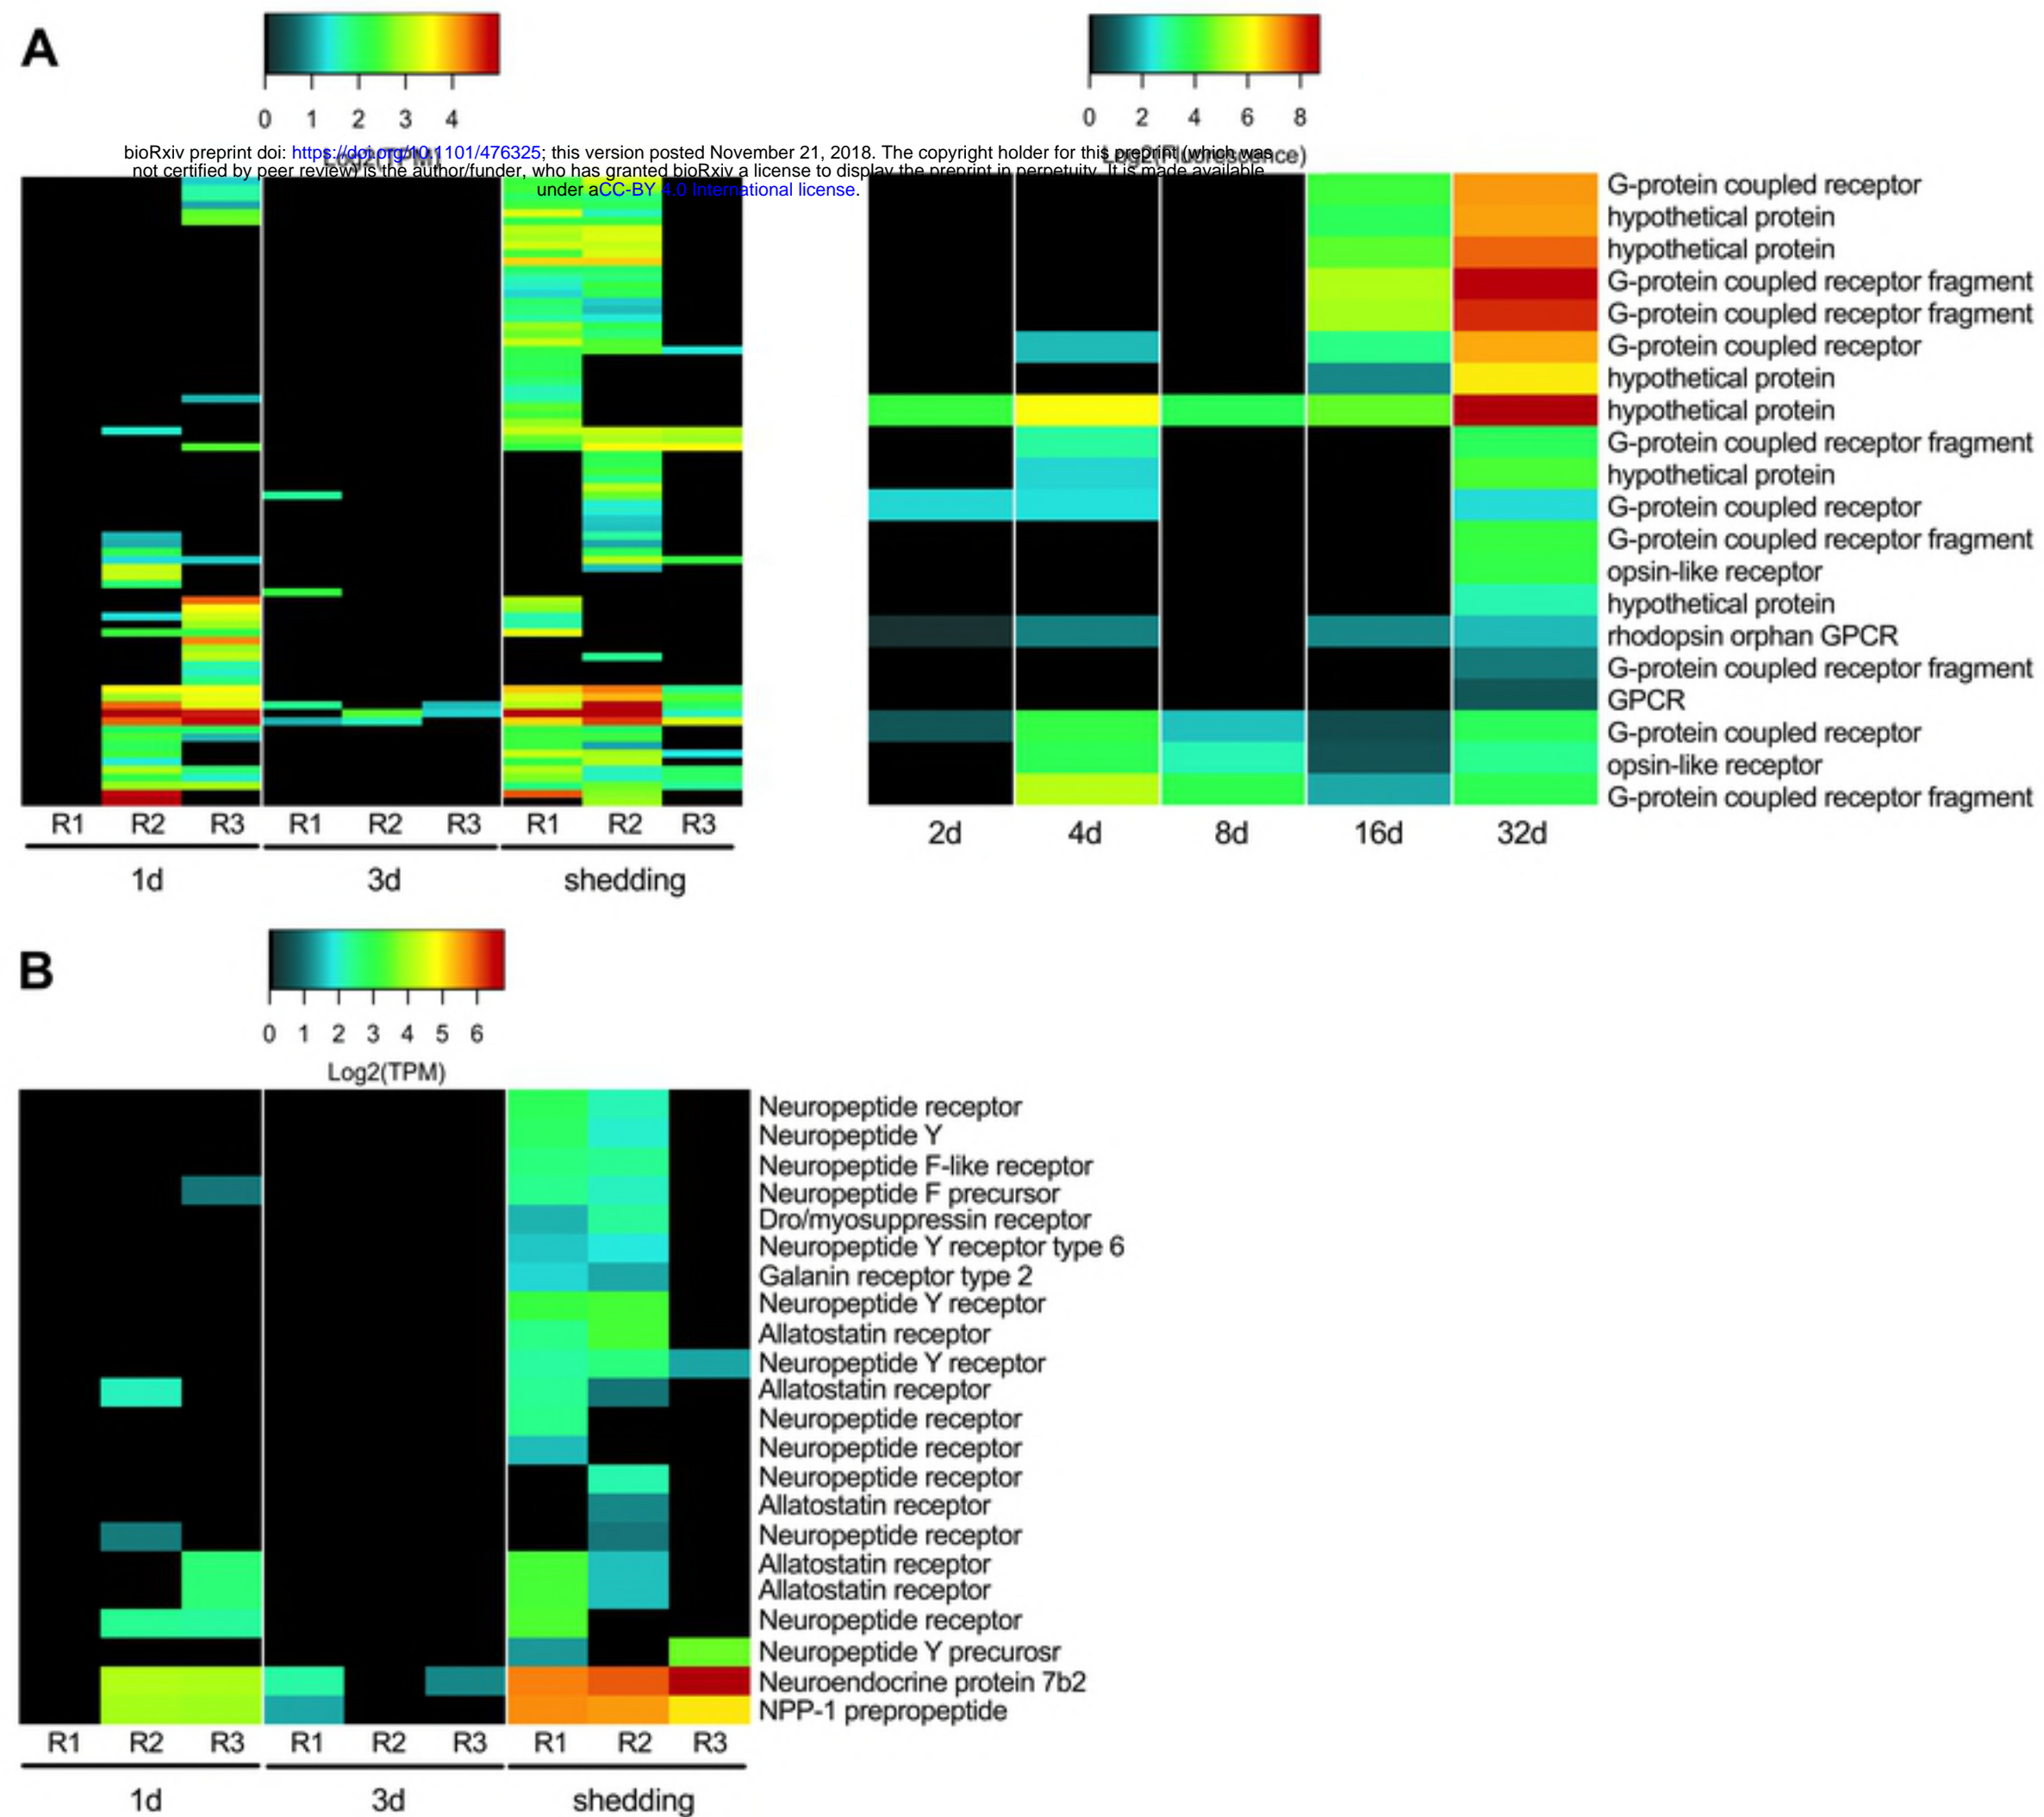

Fig 8

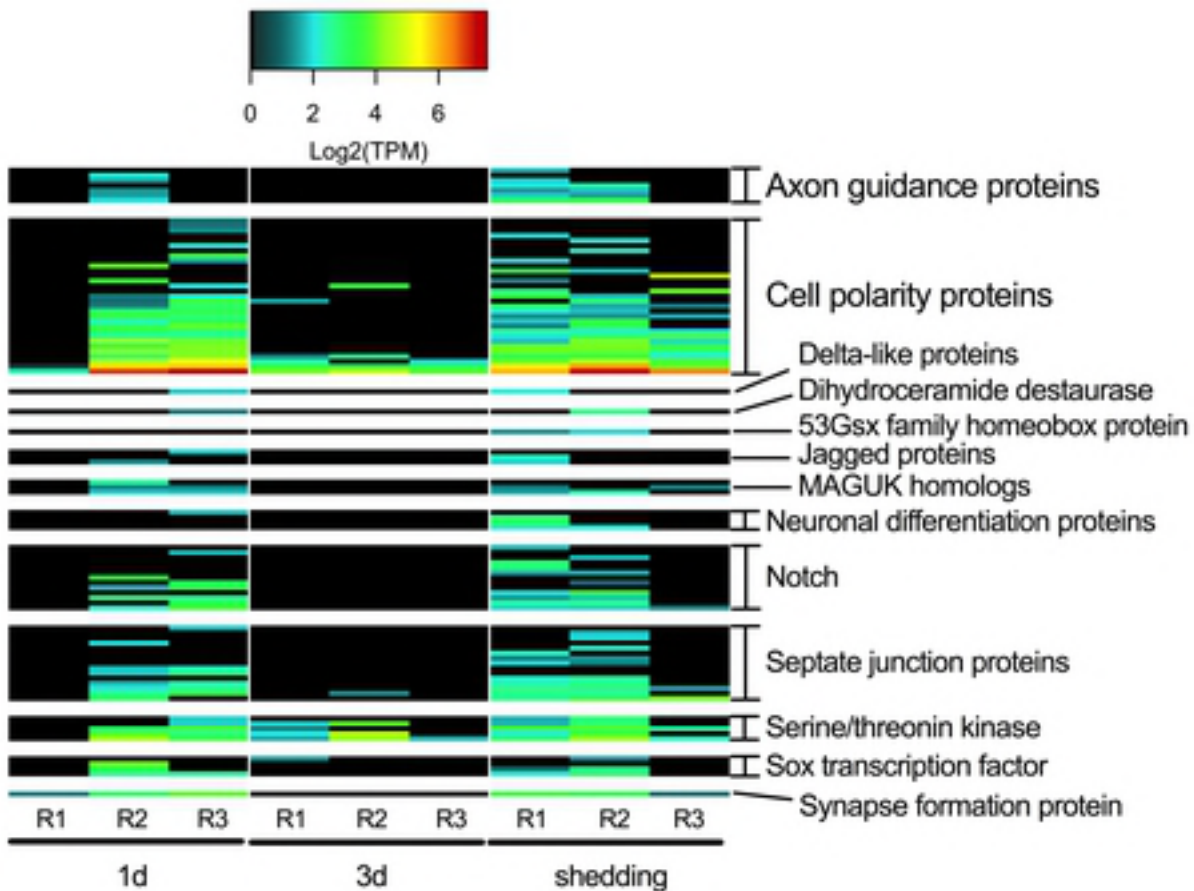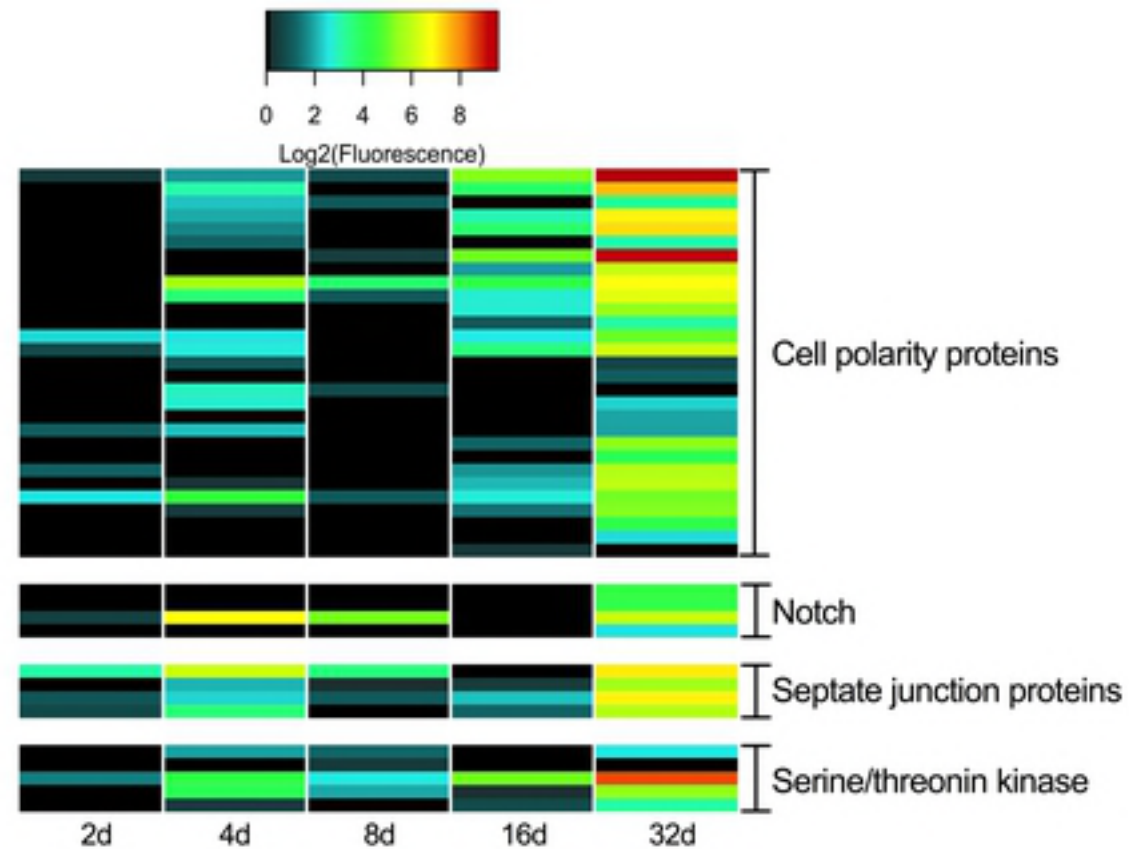

Fig 9

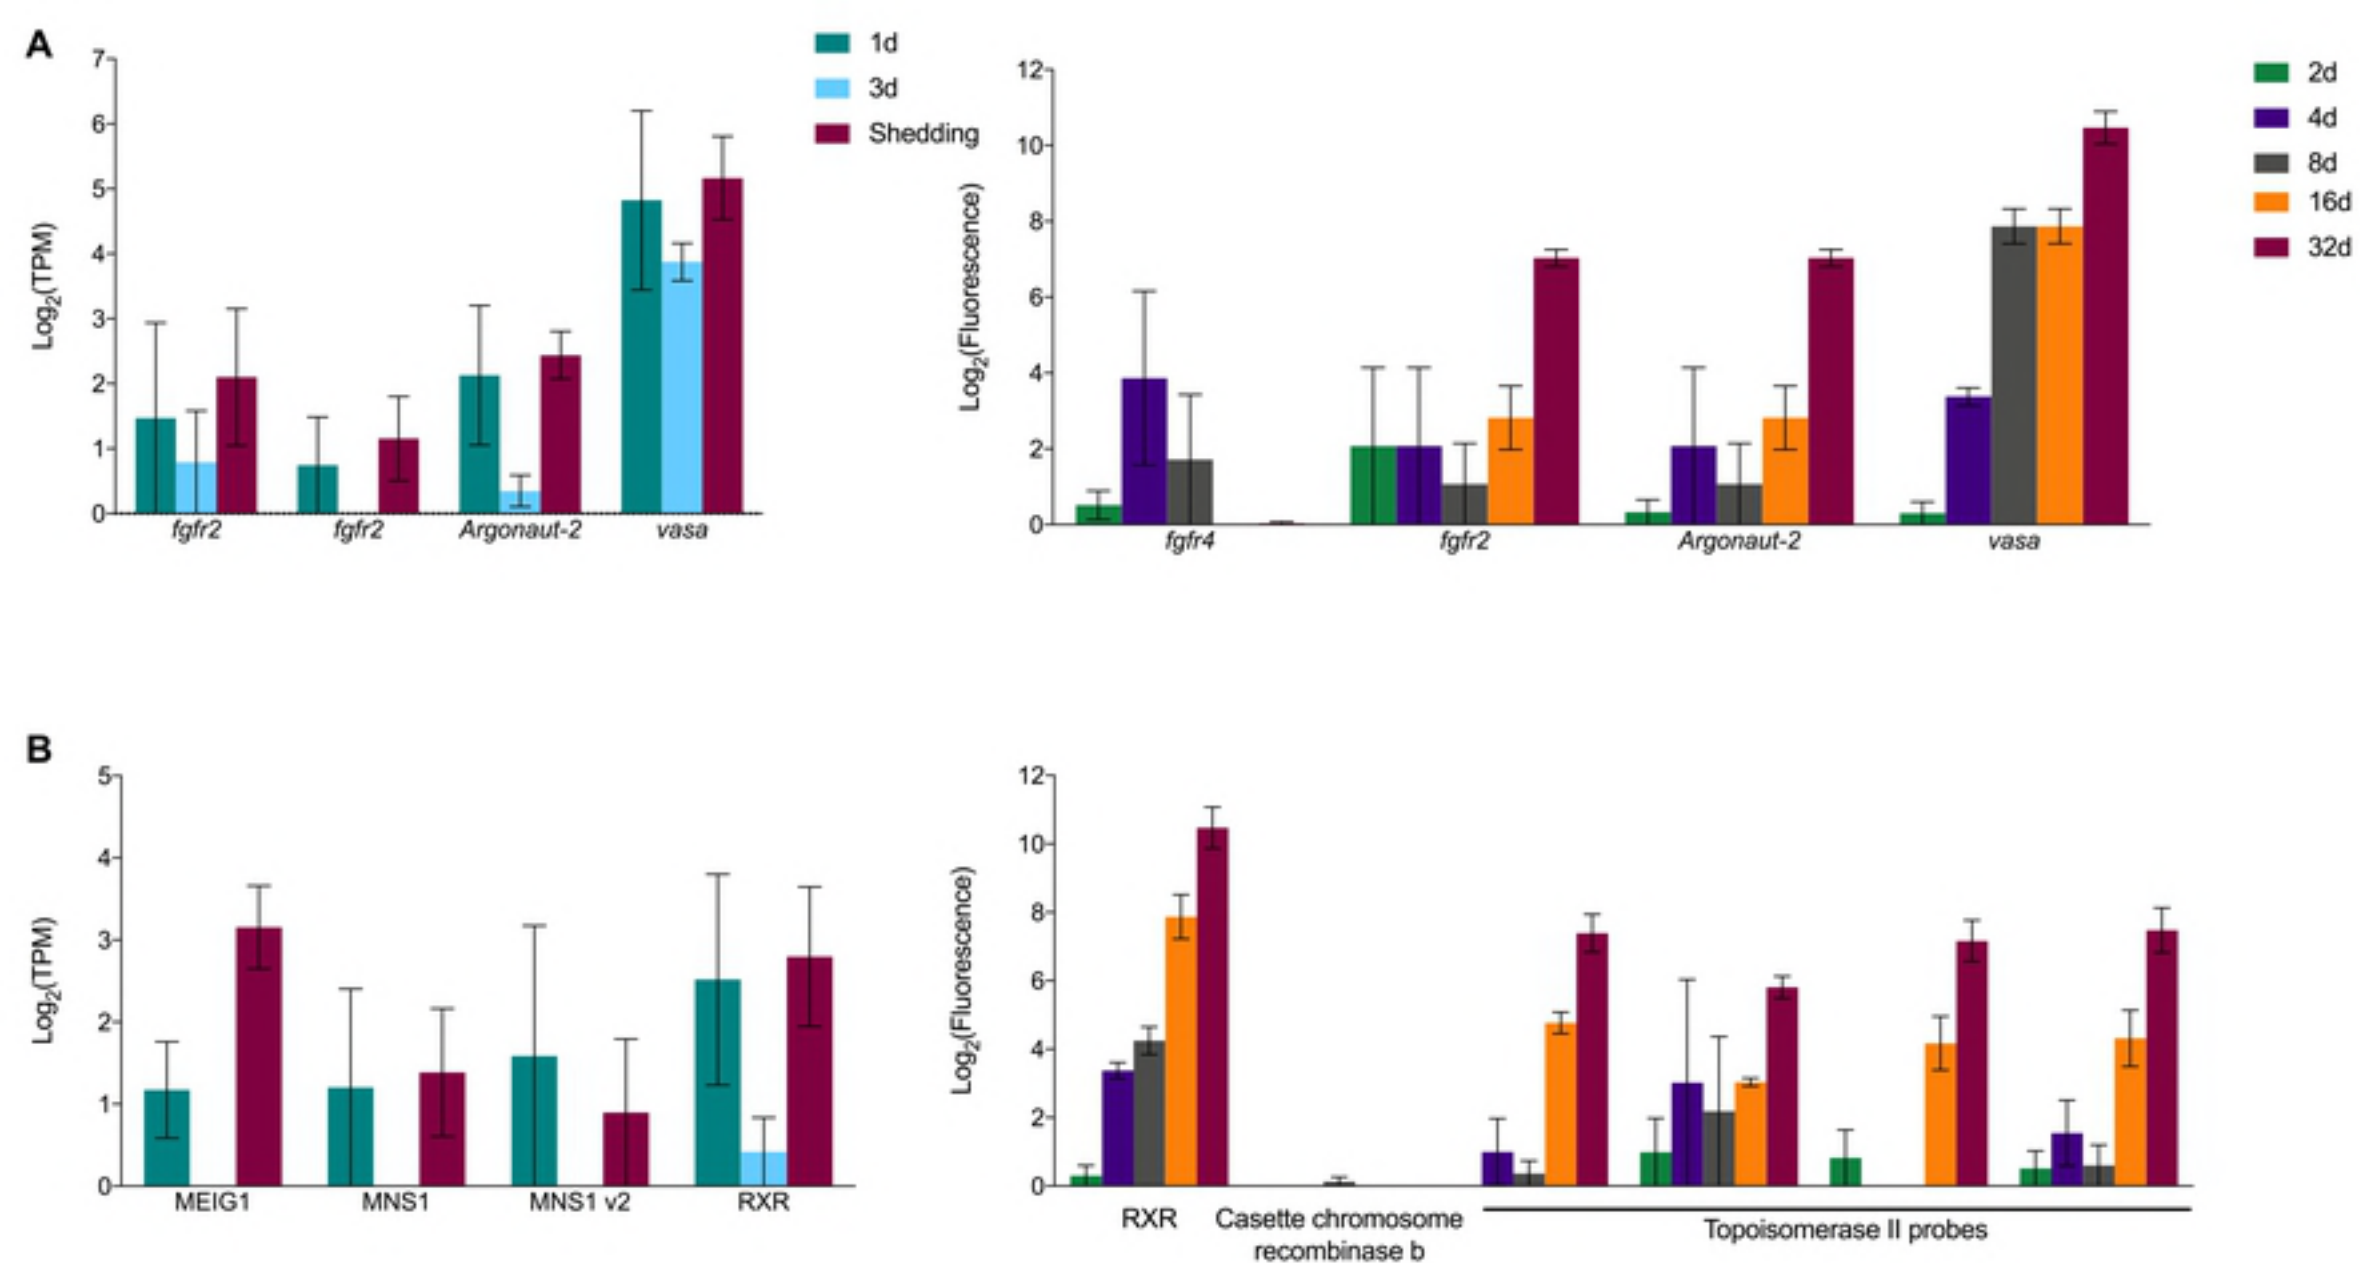

Fig 10

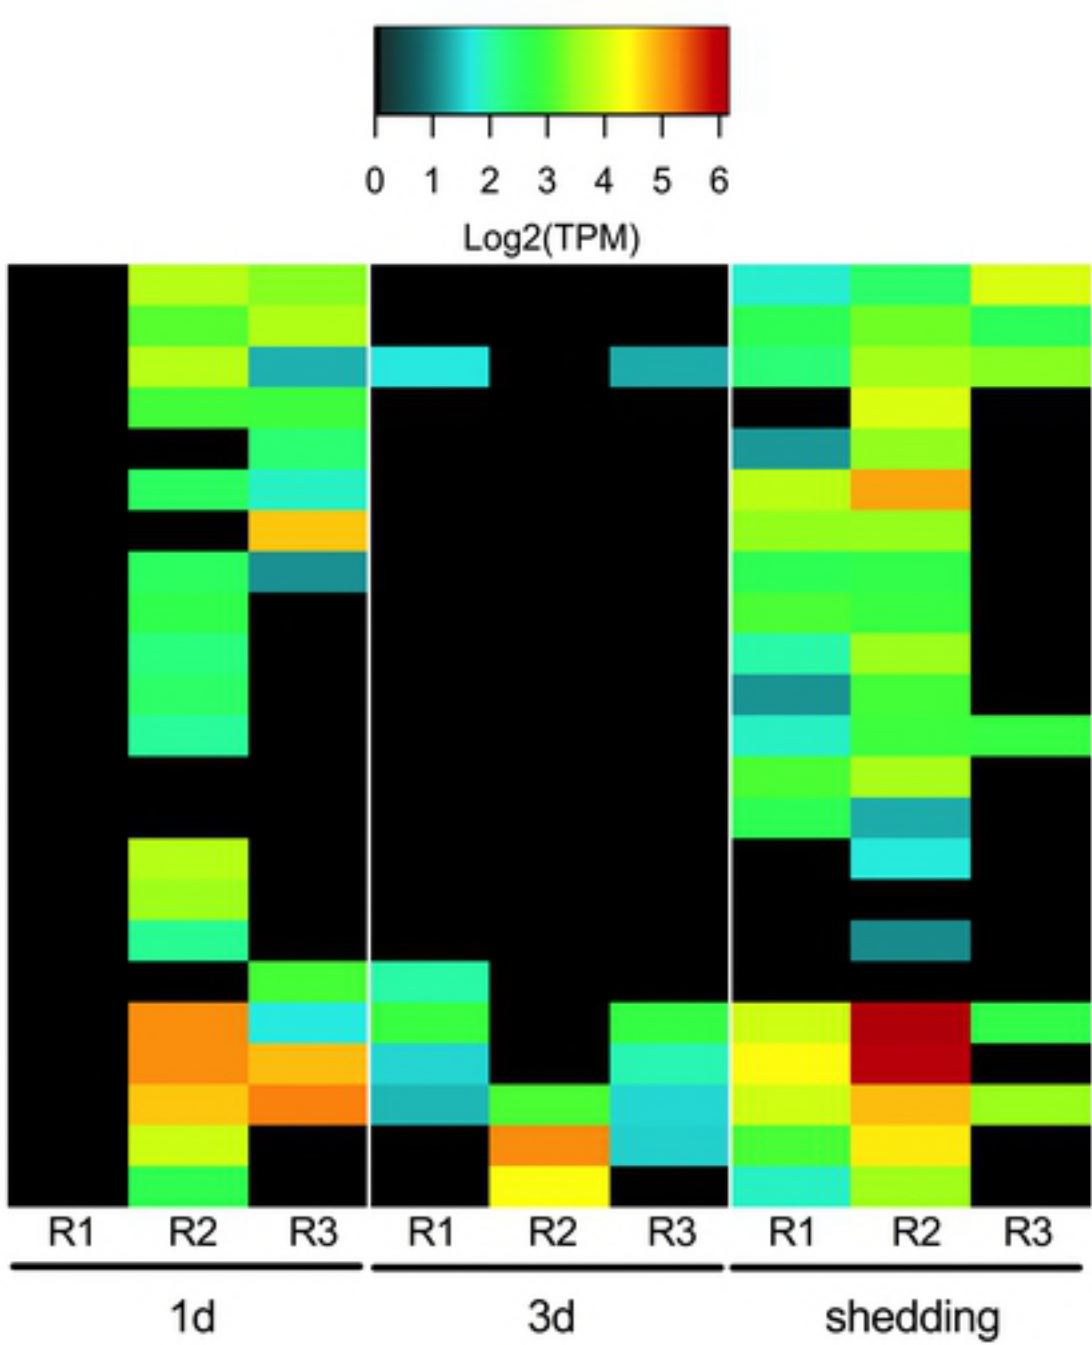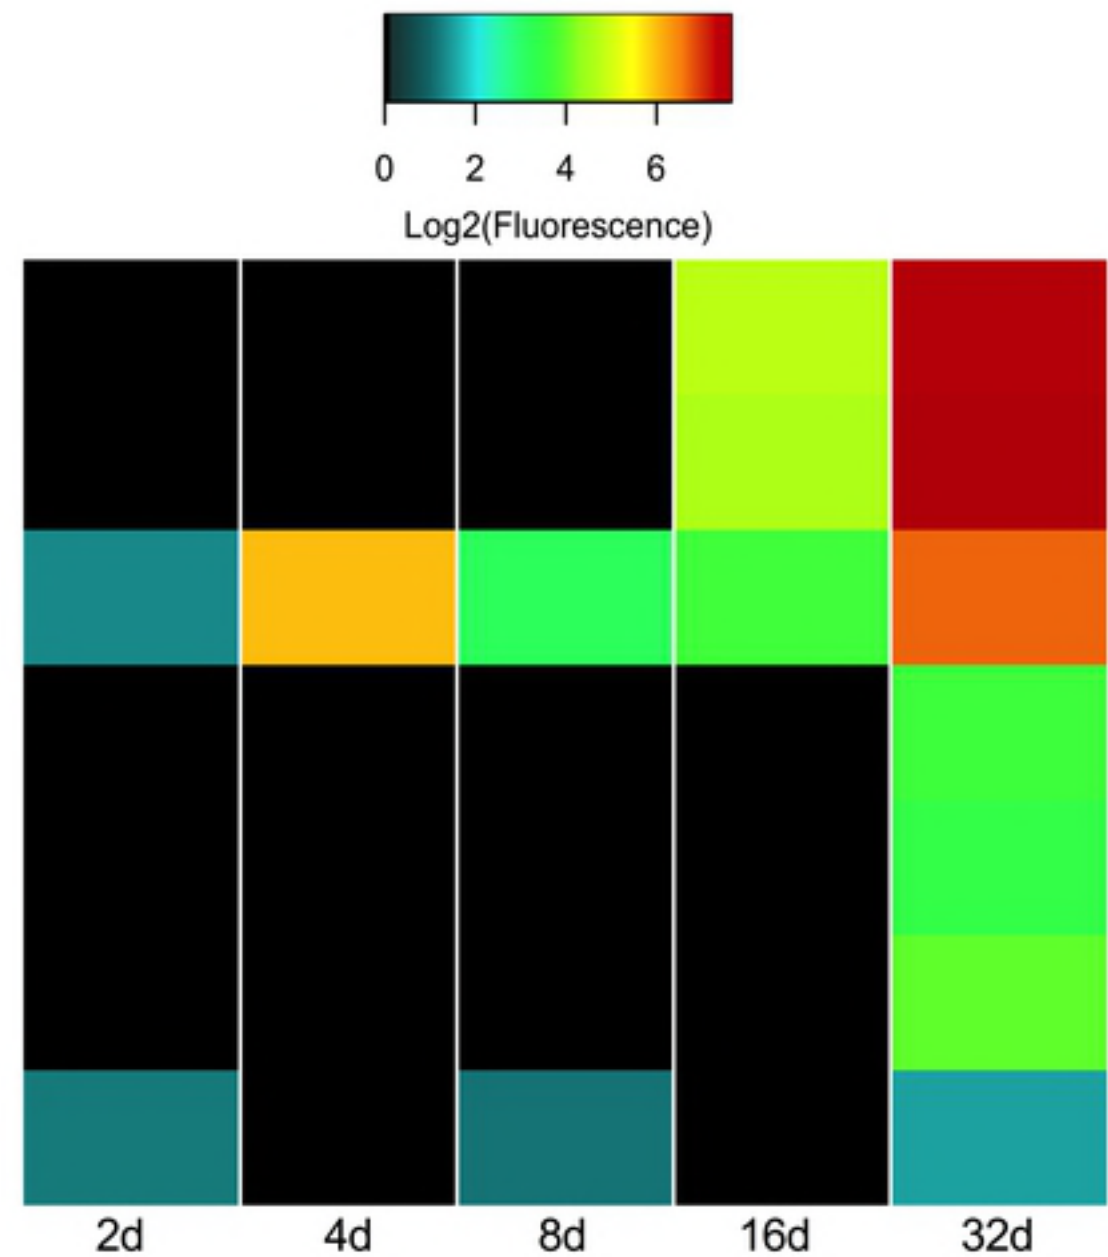

Fig 11

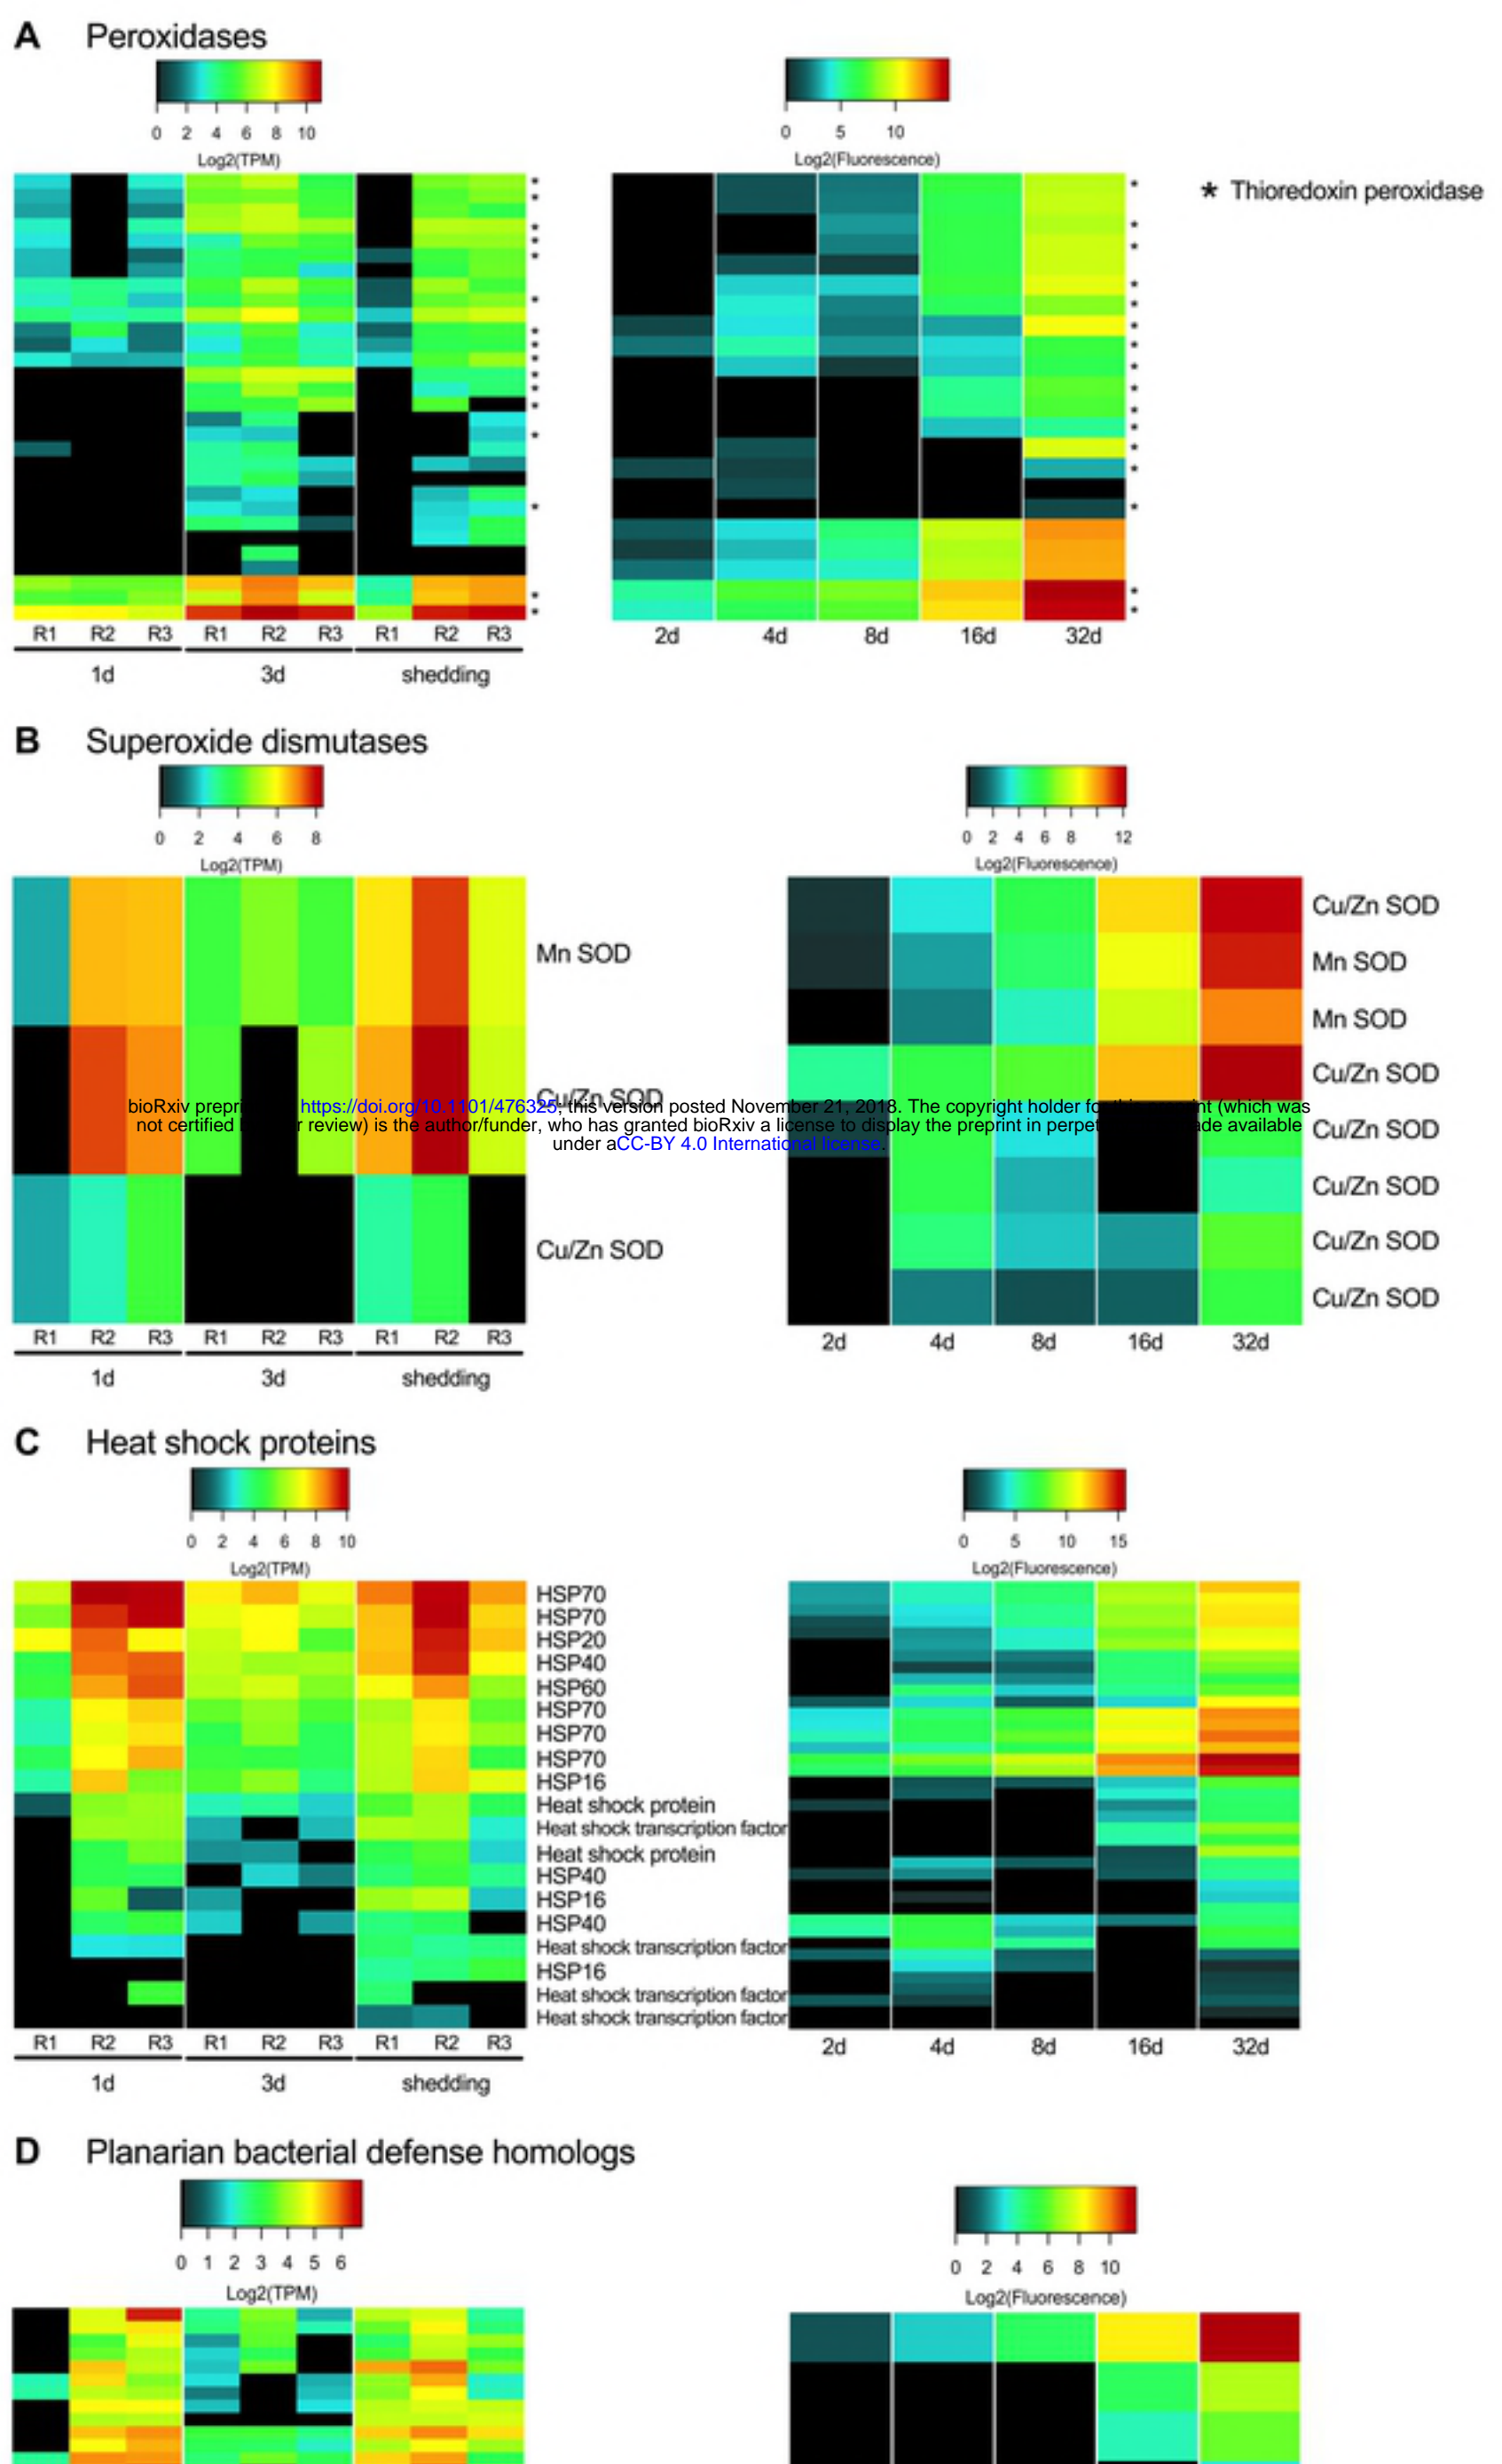

Fig 12

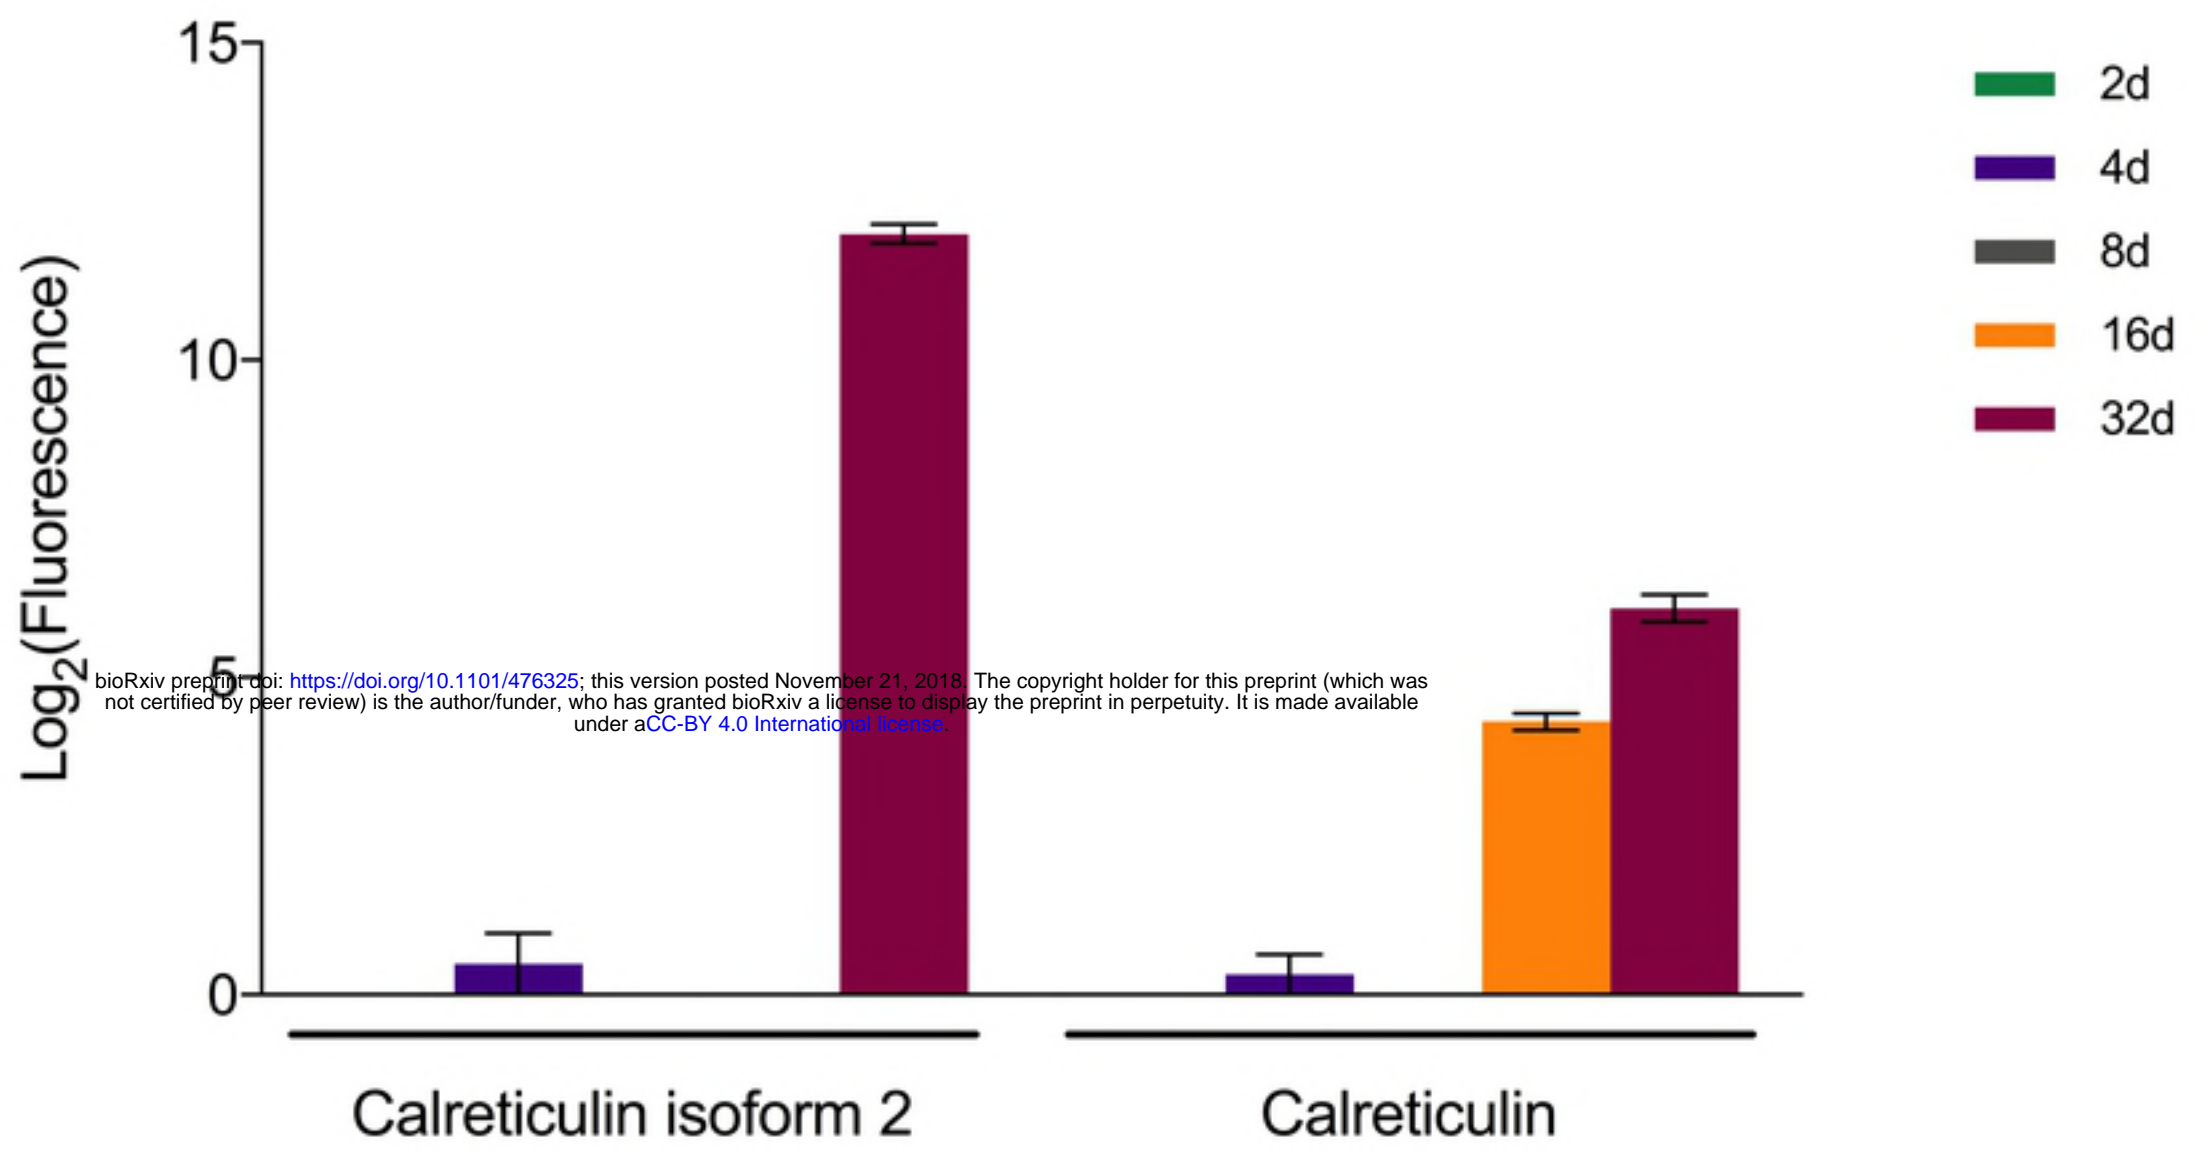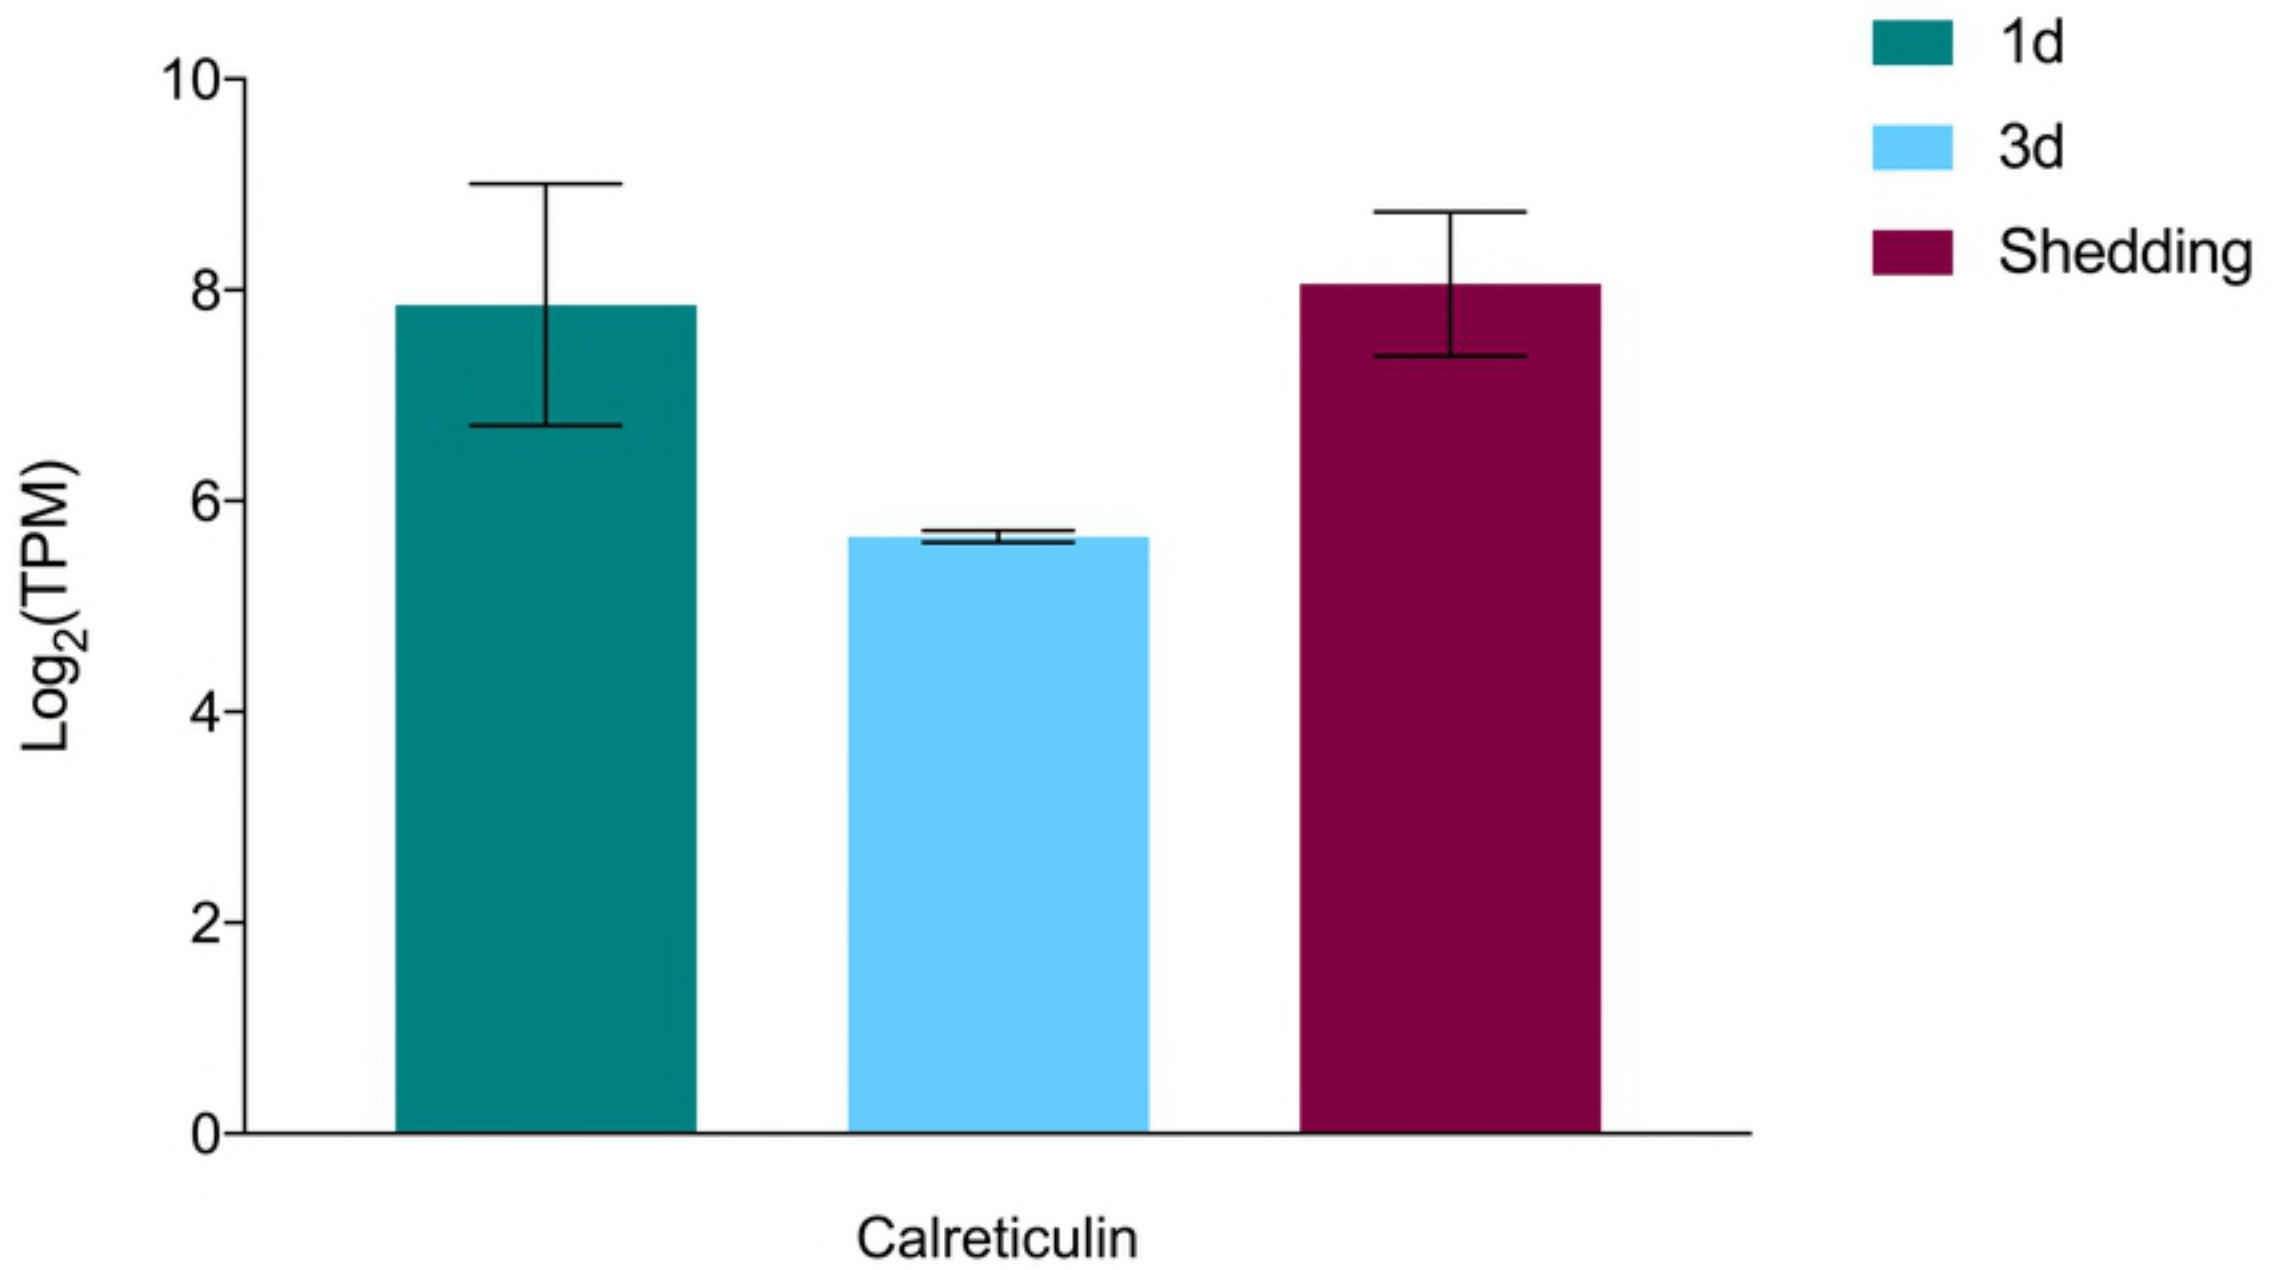

Fig 13
